# Supplementary material for: A new mode of NPR1 action via an NB‐ARC–NPR1 fusion protein negatively regulates the defence response in wheat to stem rust pathogen
Source: PubMed Central journal article supplement — New Phytol. 2020 Aug 26;228(3):959–72. doi: 10.1111/nph.16748 (PMC7589253; doi:10.1111/nph.16748), 2020-08-26
Supplement: NPH-228-959-s001.pdf [file NPH-228-959-s001.pdf]

## New Phytologist Supporting Information

Article title: **A new mode of NPR1 action via an NB-ARC-NPR1 fusion protein negatively regulates defense response to stem rust pathogen in wheat**

Authors: Xiaojing Wang, Hongtao Zhang, Bernard Nyamesorto, Yi Luo, Xiaoqian Mu, Fangyan Wang, Zhensheng Kang, Evans Lagudah and Li Huang

Article acceptance date: 01 June 2020

The following Supporting Information is available for this article:

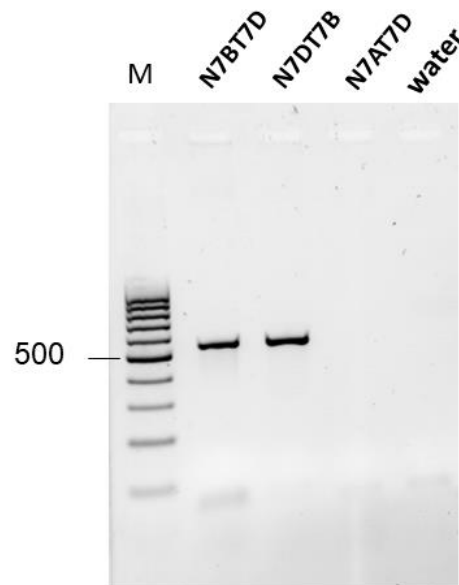

Fig.S1

**Fig. S1** Specificity of primers for screening mutations on *Ta7ANPR1*. The primers were designed based on the specific sequences of *Ta7ANPR1* and only amplified a fragment when 7A chromosome is present. Nothing was amplified when 7A chromosome is absent in N7AT7D or in negative water control.

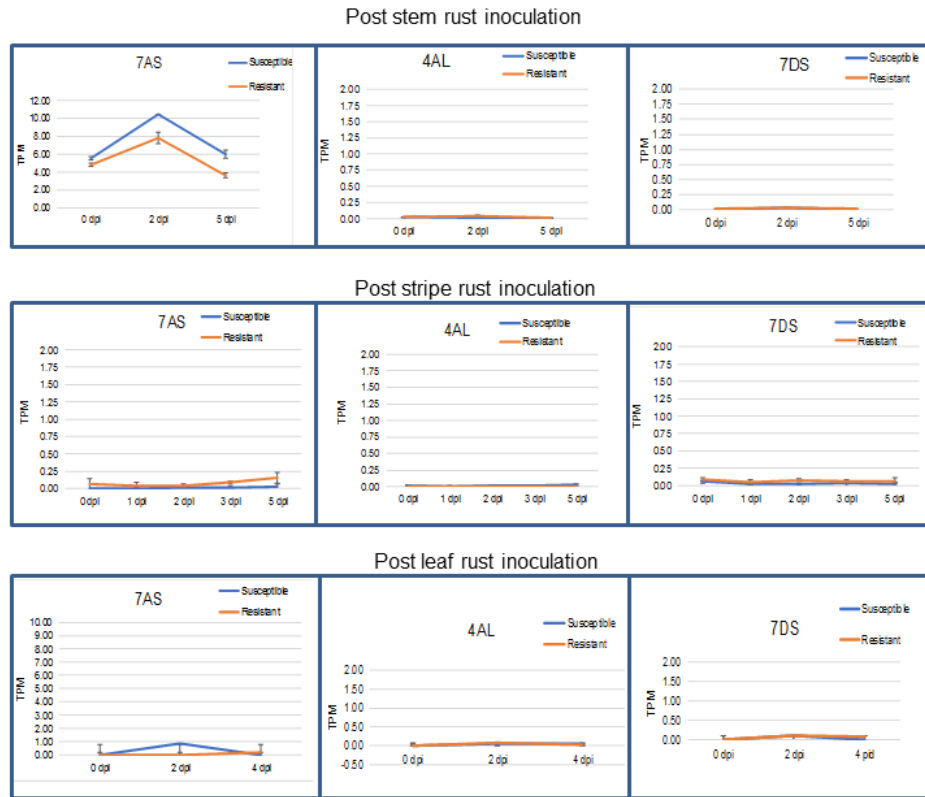

Fig.S2

**Figure S2:** Transcripts of *Ta7ANPR1*, *Ta4ANPR1* and *Ta7DNPR1* in the RNA-seq data generated from Columbus (susceptible) and Colubus-NS765 (Resistant) inoculated with *Pgt*, Avocet+Yr5 and Vuka (susceptible) inoculated with *Pst*, and *Lr48* near-isogenic lines in Lal Bahadur (susceptible) background inoculated with *Pt* inoculated wheat. TPM: Transcripts Per Million. Each error bar shows the standard deviations among the three biological replicates.

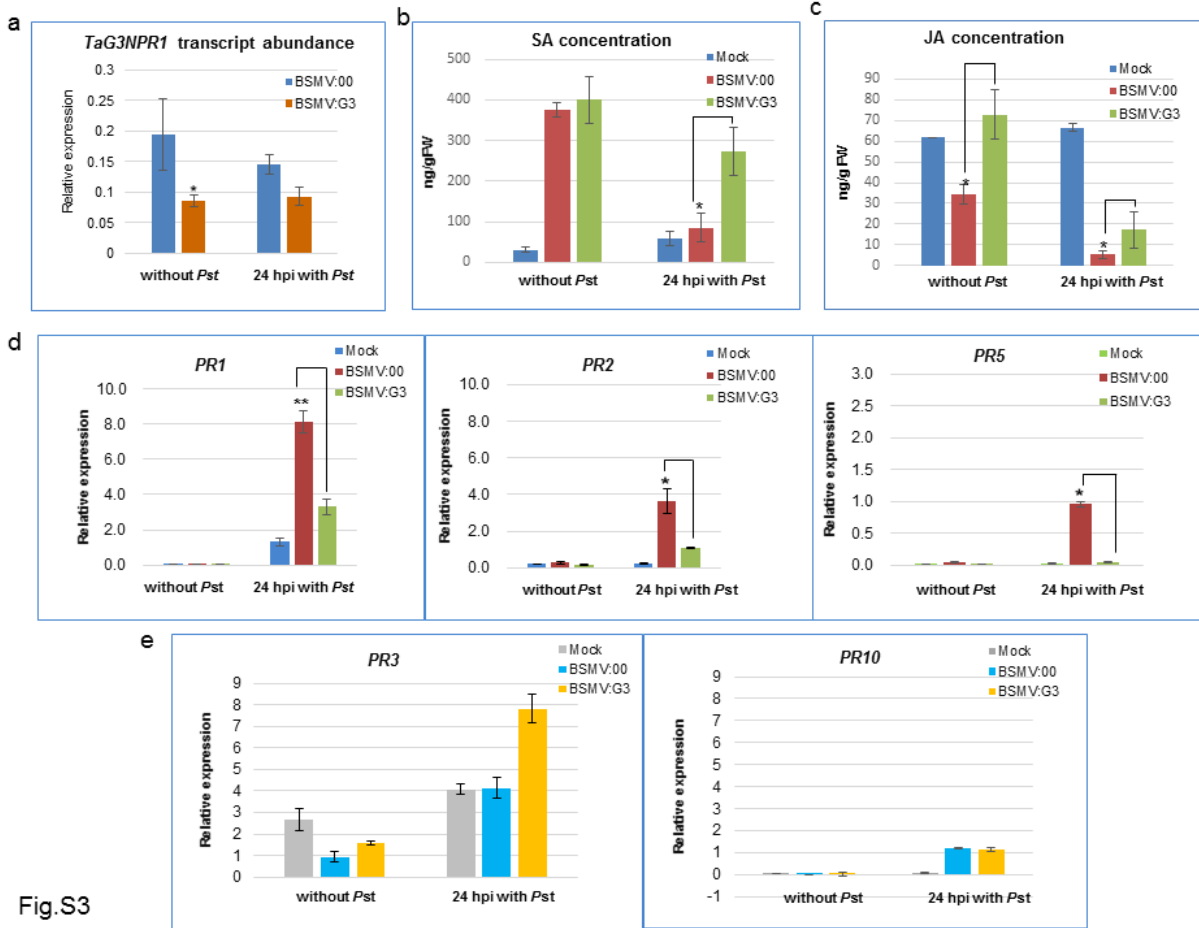

Fig.S3

**Figure S3: 3a:** Transcript abundances of six copies of NPR1 on group 3 homeologous chromosomes at 10 days post BSMV inoculations with or without a silencing target. **3b:** SA concentrations in the silenced leaf segments and the corresponding segments of controls. **3c:** JA concentrations in the leaf segments of six copies of NPR1 on group 3 homeologous chromosomes were silenced and the corresponding segments of controls at 10 days post BSMV inoculations with or without a silencing target. **3d:** Transcript abundances of three SA-responsive *PR* genes at 10 days post BSMV inoculation without *Pst*. **3e:** Transcript abundances of two JA-mediated *PR* genes during the time-course study of post-*Pst* inoculation. \* indicates the  $p$  value  $< 0.05$  and \*\* indicates the  $p$  value  $< 0.01$ . Each error bar shows the standard deviations among the three biological replicates.

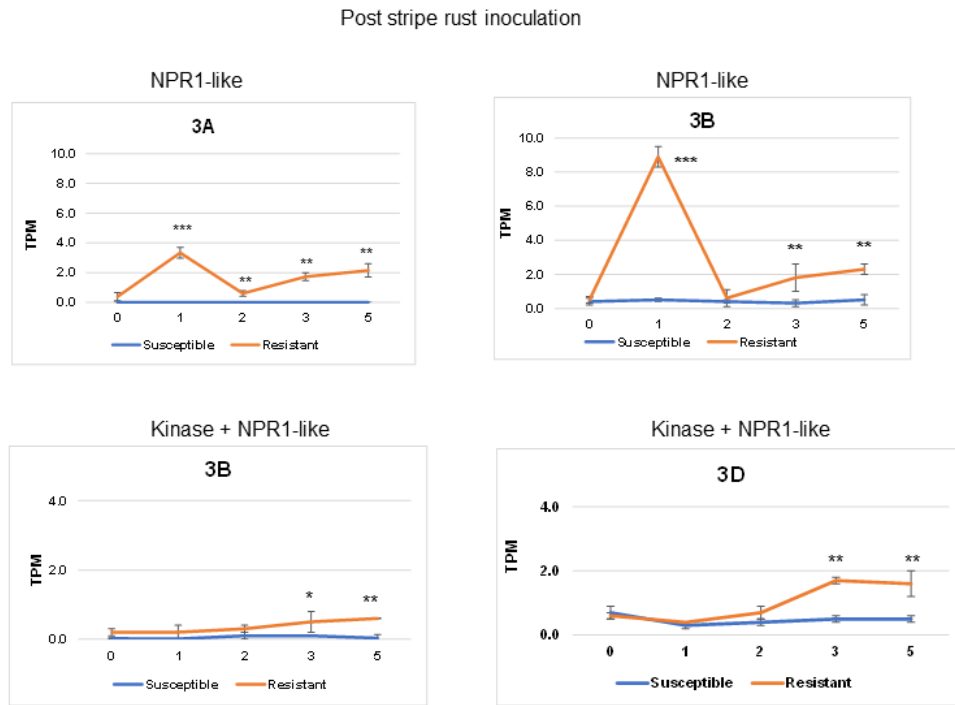

Fig.S4

**Figure S4:** Transcripts of *TaG3NPR1* and *TaG3Kinase-NPR1* in the RNA-seq data generated from Avocet+*Yr5* and Vuka inoculated with *Pst*. TPM: Transcripts Per Million. \* indicates the  $\rho$  value  $< 0.05$  and \*\* indicates the  $\rho$  value  $< 0.01$ . Each error bar shows the standard deviations among the three biological replicates.

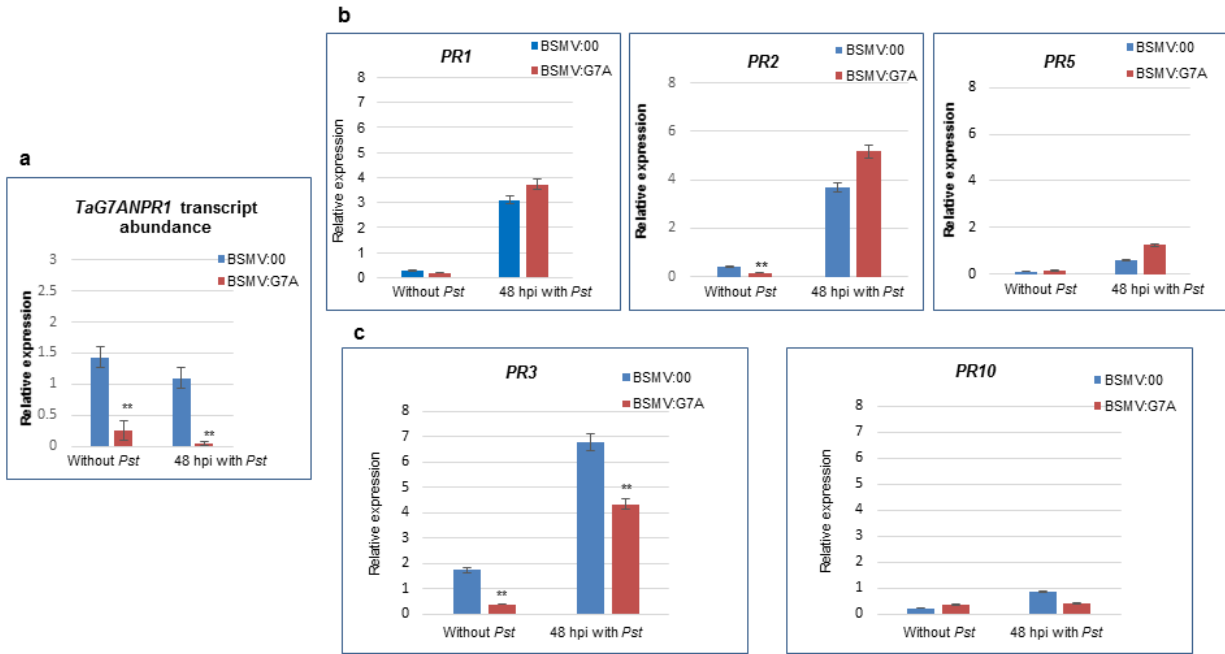

Fig.S5

**Figure S5: 5a:** Transcript abundances of *Ta7ANPR1* at 10 days post BSMV inoculations in BSMV:G7A-silenced plants and BSMV:00 control plants without stripe rust *Pst* rust inoculation and at 48 hpi with *Pst* inoculation (12 days post BSMV inoculations). **5b:** Expression profiles of *PR1*, *PR2* and *PR5* in *Ta7ANPR1*-silenced plants and BSMV:00 control in the absence of *Pst* or at 48 hpi with *Pst*. **5d:** Expression profiles of *PR3* and *PR10* in *Ta7ANPR1*-silenced plants and BSMV:00 control in the absence of *Pst* or at 48 hpi with *Pst*. \*\* indicates the  $\rho$  value < 0.01. Each error bar shows the standard deviations among the three biological replicates.

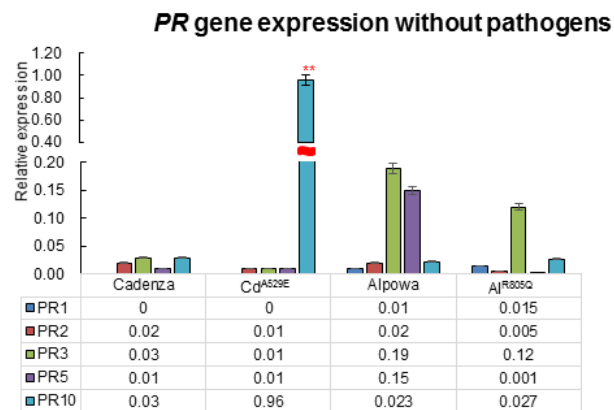

Fig. S6

**Figure S6:** Transcript abundances of five *PR* genes in the wild types and mutants without pathogen inoculation. \*\* indicates the  $p$  value  $< 0.01$ . Each error bar shows the standard deviations among the three biological replicates.

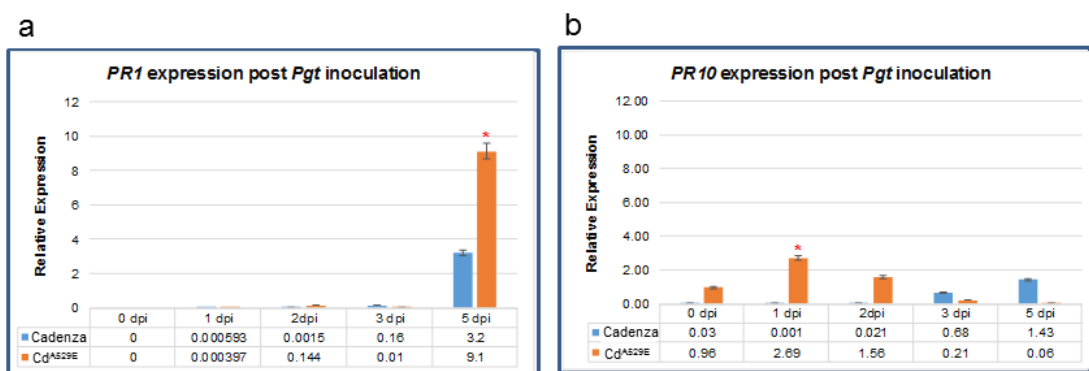

Fig. S7

**Figure S7:** Transcript abundances of two *PR1* (a) and *PR10* (b) genes during a time-course study of post-*Pgt* inoculation. \* indicates the  $p$  value  $< 0.05$ . Each error bar shows the standard deviations among the three biological replicates.

**Table S1** Sequences of the Oligos used to construct silencing constructs

| Primers    | Sequences (5'-3')                                                                          |
|------------|--------------------------------------------------------------------------------------------|
| G3-oligoF  | AGATATTGGAGCAAGCTGAAAGAAGGGATTACAATTTGTAGAAGCATCGGTTTCTCTTGCATTGGCTGGTGACTGTCTTCGTGGGATGT  |
| G3-oligoR  | GAGCTAAGTGTTCCTCCTTCATTTTGAAAGAAGTATCATTTAGATCAACGGTTGTTATCTCCAGAGGTGGATTTGTACCAACATCCCACG |
| G7-oligoF  | TCTTTGACAAGATGGCCGGGTTCTCAGTTCTCAAGTACTTCAAGTTGAGGTTACGAGTGGTATCCCATGGCTGAAATTTGAGGCGGATG  |
| G7-oligoR  | CTCGATGCGGATTAGTTGATGTTGGTCCATTGGGAAATTCATTGAAACCCAGCTTCACTTCCAGAGATTAGGCATTGCATCCGCCTC    |
| G7A-oligoF | GACAGGTATCTAATAGTCATTGATGACTTGTGGGATGCATCAGCATGGGATATTATTAAATGTGCTTTTCCGAAGGGAAGCCATGGCA   |
| G7A-oligoR | GATACATATGAAAATACAGCAAACATGTCTTCAGATGCTGAGGAAGATTATTGTAGCTAAGGTTCACTACTTTTCTCGTTTGCCATGGCT |

**Table S2** Sequences of the primers used for PCR

| Primers              | Sequences (5'-3')                                       | Genes measured               |
|----------------------|---------------------------------------------------------|------------------------------|
| G3-RT-F<br>G3-RT-R   | GGCTTTCCTAACAAACAC<br>AAGTGCGATGTCCAGAAGTT              | NPR1-like on 3A, 3B, 3D      |
| G7-RT-F<br>G7-RT-R   | TGACCCCATAGACCTCACTGG<br>CAAGGCTCCACAGACTGATGA          | NPR1-like on 7A, 4A, 7D      |
| 7A-MF<br>7A-MR       | GTTCGTCGTCTATCTCTCATCTTTGG<br>CCAGAAGTGAAGGAATACACGACAT | TaG7NPR1 mutant screening    |
| 7A-F<br>7A-R         | ACATCACAAGGTCACAAGTTC<br>ATGCAGATATCACTTGTGATC          | Ta7ANPR1                     |
| 7A-Alt-F<br>7A-Alt-R | ACTGAACCTTAGCTACAATAA<br>GCAGCTGTGCGGCGAGCATT           | Ta7ANPR1 alternative isoform |
| 18S-F<br>18S-R       | GTGACGGGTGACGGAGAATT<br>GACACTAATGCGCCCGGTAT            | 18S rRNA                     |
| ACT-F<br>ACT-R       | CCAGCAATGTATGTCGCAATCC<br>CCAGCAAGGTCCAAACGAAGG         | Actin                        |
| GAP-F<br>GAP-R       | GACTGTTAGACTTCGGAAGC<br>CATCAACGTAACCCAAAATG            | GAPDH                        |

**Table S3** qRT-PCR analysis of *TaNPR1*-like gene expression in silenced plants

| Silencing constructs | NPR1 transcripts measured | Relative expression* in CS |      |      | Average | SD   |
|----------------------|---------------------------|----------------------------|------|------|---------|------|
|                      |                           | Exp1                       | Exp2 | Exp3 |         |      |
| BSMV:(G3+G7)         | Group3                    | 0.76                       | 0.70 | 0.76 | 0.74    | 0.03 |
|                      | Group7                    | 0.67                       | 0.68 | 0.70 | 0.68    | 0.01 |
| BSMV:G7              | Group7                    | 0.67                       | 0.7  | 0.71 | 0.69    | 0.02 |
| BSMV:G7A             | NPR1-7A                   | 0.69                       | 0.59 | 0.8  | 0.69    | 0.08 |

\*Relative expression was calculated by dividing the expression value of the target gene in silenced plants by the control plants infected with BSMV: 00. Each number is an average of triplicate.
