# Supplementary material for: A new mode of NPR1 action via an NB‐ARC–NPR1 fusion protein negatively regulates the defence response in wheat to stem rust pathogen
Source: PubMed Central journal article supplement — New Phytol. 2020 Aug 26;228(3):959–72. doi: 10.1111/nph.16748 (PMC7589253; doi:10.1111/nph.16748), 2020-08-26
Supplement: NPH-228-959-s002.pdf [file NPH-228-959-s002.pdf]

## New Phytologist Supporting Information

Article title: **A new mode of NPR1 action via an NB-ARC-NPR1 fusion protein negatively regulates defense response to stem rust pathogen in wheat**

Authors: Xiaojing Wang, Hongtao Zhang, Bernard Nyamesorto, Yi Luo, Xiaoqian Mu, Fangyan Wang, Zhensheng Kang, Evans Lagudah and Li Huang

Article acceptance date: 01 June 2020

**Notes S1:** Amino acid sequences and the location of each predicted functional domain of the TaNPR1 proteins in Fig. 1b, c.

### NPR1-like proteins on group 3 chromosomes

>G105400\_Chr.3AS (400 aa)

MQRHLLDFLDNVEVDNLPLILSVANLNCNKSCVKLFCLEIVVRSNLDMITLEKALPEDVIKQI  
IDSRLTLGLASPEDNGFNPKNHVRRI LKALDSDVELVRMLLTEGQTNLDDAFALHYAVEHCDSK  
ITTELLDIALADVNLNRNPRGYTVLHIAARRRDPKIVVSLLTGKARPSDITFDGRKAVQIAKRLT  
KHGDYFGNTEEGKPS PNDKLCIEILEQAERRDPQLGEASVSLALAGDCLRGKLLYLENRVALAR  
IMFPIEARVAMDIAQVDGTLEFTLGPSTNPPLEITTVDLNDTSFKMKEEHLARMRALSKTVEVG  
KRFFPRCSNKLDKIMDDEPELASLGRDASSERRRRFHDLQDALLKAFSEDKEEFNKTTTLSSSS  
SSTSTVARNLTGRPRR

46-90: DUF3420 unknown domain

89-192: Ankyrin repeats (3 copies)

189-387: NPR1-like-C terminal

-----  
>G123800\_Chr.3B (633 aa)

MEAPSSHVTASFSDCDDSVSMEDAAPDADVEALRRLSDNLAAAFRSPDDFAFLADALVAVPGAP  
DLRVHRCVLSARS PFLRALFKRRAAAAGSSGGVEGNRLELRELLGDEVEVRYEALVLDYLYS  
GRVRDLPKSACACVDEGGCAHVGCHPAVSFMAQVLF AASTFQVGE LANLFQESMYSTFPDIIG  
KHVHHLSPDNSQHRESATFSIVLLFHVF EKRVLTHVMPFFSMQRHLLDFLDKVEVDNLPLILSV  
ANLNCNKSCVKLFCLEMEMVRSNLDMITLEKALPQDVIKQITDLRITLGLASPEDNGFNPKNHVR  
RILRALDSDVELVRMLLTEGQTNLDDAFALHYAVEHCDSKITTELLDIALADVNLNRNPRGYTV  
LHIAAKRRDPKIVVSLLTGKARPSDITFDGRKAVQISKRLTKHGDYFGNTEEGKPS PNDKLCIE  
ILEQAERRDPQLGEASLSLALAGDCLRGKLLYLENRVALARIMFPIEARVAMDIAQVDGTLEFT  
LGSSTNPPLEITTVDLNDTSFKMKEEHLARMRALSKTVELGKRFFPRCSNVLDKIMDDEPELAS  
LGRDASSERKRRFHDLQDTLLKAFSEDKEEFNRTTTLSSSSSSSTSTVARNLAGRTRR

45-185: BTB domain

279-323: DUF3420 unknown domain

322-411: Ankyrin repeat

422-620: NPR1-like-C

-----  
>G107500\_Chr.3D-1 (704 aa)

MEAPSSHVTASFSDCDDSVSMGDAAPDADVEALRRLSDNLAAAFRSPDDFAFLADALVAVPGAP  
DLRVHRCVLSARSPPFLRALFKRRAAAAAATGSSGGAEGRVELRELLGEEVEVGYEALVLDY  
LYSGRVRDLPKSACACVDVDGCAHVGCHPAVSFMAQVLFMASTFQVGEASLQVRLPPPLHH  
DAFLVSDIYGACWEYIFARTFLCSDSKESMYSTFPPDTIGKHVHLLSSDNSQHRESATILYRYL  
NLCISDAEAGDELRVYHLMITPVGLLLVTVFCRCIDKPVLTGMPFFSMQRHLLDFLDKVEVDN  
LPLVLSVANLCNKSCVKLFEFCLEMVVQSDLDMITLEKALPQDVIKQITDSRITLGLASPEDNG  
FPNKHVRRILRALDSDDVELVRMLLTEGQTNLDDAFALHYAVEHCDSKITTELLDIALADVNL  
NPRGYTVLHIAAKRRDPKIVVSLLTGKARPSDLTFDGRKAVQISKRLTKHGDFGNTTEEGKPS  
NDKLCIEILEQAERRDPQFGEASVSLALAGDCLRGMLLYLENRVALARIMFPIEARVAMDIAQV  
DGTLEFTLGYGTNPPELITTVDLNDTSFKMKEEHLARMRALSKTVELGKRFFPRCSNVLDKIMD  
DEPELASLGTDACSERKRRFHDLQDTLLKAFSEDKKEFNRTTTLSSSSSSTSTVARNLAGRTR

45-185:BTB domain  
350-394:DUF3420 unknown domain  
395-481:Ankyrin repeat  
691-727:NPR1-like C

---

>G117002LC\_Chr.3D-2 (902aa)  
MVATRPLAERDAMFVAIDAAAEELDNETEDVISSTSAIPPPFAPLRHDEDTASMYTAVYNE  
EKYNIGGTPPLEFQEGHHQRLAGPHSRYAGMIWMAGSRIIVCGDYHGSSQLDWHTCYKIEGI  
CNGLHYLHEQIDKSVLHLDLKPANVLLDNNLAPKLTDFGLSKLLDQYQTMFTPNRFGTLGYMA  
PEYIDEGTITPKTDIFSGFVIIMELITGHRDYPVAGTSSDGFIELALKKWRNTLEKAQGYTK  
IEVDCQQIKRCIQIGLICVNPECSKRPTTAKIIKMLKGLEISDCRISNEATSSAHQTSNGVSE  
QGKPHPKNTLCIEISEEADRQDLALVSLAIAGDCLCGNLKLLYLKNGEHI SPQASIVRIVVPG  
SPAGTELHVDPYMLSMRSPYLRAIFARHNNHYGASGSSAEGNRMDLQEFGLGKEVKVEYDALL  
VLLYLYSGRVGDLPEPAYICADENGCAHLGCHPTVSFKVQVLFVAFTFQVPELTSLFQVCISL  
SLLPMRDLFDVLHKVEVDNLPLILSVANLCKKSCRKLLERCLEMVVQSNLDMITLEKVLPPDV  
VKQITDLRLSFGLASSEDMGFNPKHVRRILRALDSNDVELVRILIKKGQTNLDDAFALHYAVE  
HCDSKITTELLDIALADVSLRNPRGYTVLHIAARRKDPKIVVSLLTGKARPSDFTLDGRKAVQ  
ISKRLTKHGDFGSTEAGKPSPKDKLCIKILEQAERRDPQLGEASVSLALAGDCLLGKLLYLE  
NRVALARIMFPIEARVAMDIAQVDGTLEFTLGSSTNPPELITTVDLNDTSFKMKEEHLARMRA  
LSKTDKLNANVSSRAVQLYWTSSWMMNLSWLHSEEMHLPRFHDLQDTLLKVFSEDKKEEFART  
TALSSSSSSTSLSKEFDRSA

1-290: Protein Kinase domain  
370-451: BTB domain  
620-695: Ankyrin repeat  
654-679: Ankyrin repeat  
696-891: NPR1-like\_C

>G158300LC\_Chr.3B 96831605-96839117 (932 aa)  
MPAMASSSKALWGSLSSTEQKLACRVALQDADELAPPPLPVDITLGQARAHYTDMRGKSRRRHS  
GRRHRTKGTTYGSSTSTDSRRKKSQSLRDPVRMVATRPLAERDAMFVAIDAAAEELDNETED  
VISSTSAIPPPFAPLRHDEDTASMYTAVYNEEKYNIGGTPPLEFQEGHHQRLAGPHSRYAG  
MIWMAGSRIIVCGDYHGSSQLDWHTCYKIEGICNGLHYLHEQIDKSVLHLDLKPANVLLDNN  
LAPKLTDFGLSKLLDQYQTMFTPNRFGTLGYMAPEYIDEGTITPKTDIFSGFVIIMELITGHR  
DYPVAGTSSDGFIELALKKWRNTLEKAQGYTKIEVDCQQIKRCIQIGLICVNPECSKRPTTA  
KIIKMLKGLEISDCRISNEATSSAHQTSNGVSEQGKPHPKNTLCIEISEEADRQDLALVSLAI

AGDCLCGNLKLLYLKNGEHISPOASIVRIVVPGSPAGTELHVDPYMLSMRSPYLRAIFARHNN  
HYGASGGSAEGNRMDLQEFGLGKEVKVEYDALLVLLLYLYSGRVGDLPEAYICADENGCAHLG  
CHPTVSFKVQVLFVAFVTFQVPELTSLFQVCISLSLLPMRDLFDVLHKVEVDNLPLILSVANLC  
KKSCRKLLERCLEMVVQSNLDMITLKVLPDVKQITDLRLSFGGLASSEDMGFPNKHVRRIL  
RALDSNDVELVRILIKKGQTNLDDAFALHYAVEHCDSKITTELLDIALADVSLRNPRGYTVLH  
IAARRKDPKIIIVSLLTKGARPSDFTLTGDKAVQISKRLTKHGDFGSTEAGKPSPKDKLCIKI  
LEQAERRDPQLGEASVSLALAGDCLLGKLLYLENRVALARIMFPIEARVAMDIAQVDGTLEFT  
LGSSTNPPLEITTVDLNDTSFKMKEEHLARMRALSKTDKVEILDFIFPSC

197-384: Protein Kinase

649-692: Unknown function domain DUF3420

693-781: Ankyrin repeat

792-924: NPR1-like C termina

>Chr.3A 69307893-69310005 (the gene has not been predicted by  
IWGSC) (125 aa) (The DNA sequence corresponding to the Kinase  
region of the 3B and 3D Kinase fused NPR1 gene was used to as a  
query to search the IWGSC, and no homologs found on 3A)

MRGLRLIFGWAGVSEFYVADV RTPAKPPRLLLFCGTS DIRAHLRTNGYRIGWHNASGQLV  
ASARILFPIEARIAMNIAQVDGALEFTLGSSTNPPPAITTVDLNYTPFKLKDVLHARMRA  
LSQNI

1-132: NPR1-like C termina

---

### **NPR1-like proteins on group 7 and 4A chromosomes**

>G023600LC+G023700LC+G021800\_Chr.7A (1,437 aa)

MGRSPSSSTGVAGVKKGPWTVEEDILLINYFQRHGNNGNWRTL PQCAGLNRS GKSCRLRWTNYL  
RPNIKRGTFTDDEEKTIIHLHSIHGNKWSAIAATHLPGRGTGNFIKNYWNTNLRKLLQMGINPV  
THRHTDLSMLKGLPGLHAAAPGNSLSGVSMTGTRAQPHTNAASFAGSSSDMNTLG IKDKAASF  
AGSSSDMTTLGVKDEAASFTGSHSDMKPPRIKDKAASFTGNYSKMKPFRIKDEALSFTGSYS  
DMNSLR IKDEATSFTGSYS DIKSVSLQDETTSFTGSYSATGTGWD MNALSGLQADPKFQLLQ  
DHCWVISASLGAMRALVEKLDMLLLAYSSPQECSSKRVKDGMHLLKDDLEEISSYLDELLEVE  
DPPPMAMCWMNEARELSYDMEDIIDSLLLCVPPDHFNKNKKRKNKKKI IKKRLKWHRQITYI  
AQVSEHGVRTSKRIHVTVVPLPKKSKIAETISEFRIYVQEAIERH DRYLIVIDDLWDASAWD  
IIKCAFPKGS HGSRIIITQIEDVALTCCCDHWEHVFEMKPLDDDH SRKLFNFRLFGSESDCP  
EEFKQVSNEIVDICGGLPLATINIASHLANQQTGLALDLLAYMCD SLRSHSWSSSTLERTRKV  
LNLSYNNLPQHLKTCLLYFHMYPEGSI IWKDDLKQVVAEGFVATGKGKEQDKETTEKTAGIY  
FDALVDRRFIQPLYINYNNKVRRLSLIFGDAKYAKTPENITR SQVRS LRFFGLFKMPCVRDF  
KVLRLVNLQLSGHCGAHPIDLTGISELFQLRYLKITS DICIKLPNSIRGLQCLKTLDLMDAT  
RVTAVPWDIIHLPHLLHLLTPVDTNLLDWIGSMTDSVISLWLSGLKLN YLQDLHLNMSCIPSLL  
GVEALAHLIGGHGNLKTIVMSHGSSVIPGASKAII SWDDLEPLPLLQRFECSPHSCITFSRIP  
KWIKELSHLCILKIAVVELQISWVDILRGLPALTALS LYVRRAPIERII FNKADGFSVLKYFK  
LTCTSGIACLKFEAQAMPNLWKLKLGFNATPRMDQHQLIRIEHMPNLKGISVKFGGVA AHIEY  
ARSVVTSHPRNPTINMQLVNFC SNCDGSTKQNLLTNWAVKSRAAASAPMEDPPSHFTTTTFSSS  
DGIFMADMNLEALCRLSDNLAAVFRSPDVFAFLVDMHIVVPDAPDLPVLF AASTFQIAKLTNL  
FQEKGWRLLDVLDVDDVEVDNLPLILSLVANL CNKSCMKLLERCLEMVVR SNLDMITLKEALPP  
DIIKQIADSRSLGLVSAEDKGFNKHVRRILQALDSNDAEVATILHQEGQTNLDDAFALHYA

VEHCDSKIITEILDITLADVNRNPRGSLMKILFPIEATVAMEIPQVNVQLGKRFFPCCSNVL  
KKIMDDESELDSIGRDTSTERKRRFHELQDLLQKAFSEDKESSSLTSLRFI

15-63:HTH myb-type DNA binding motif  
69-114:HTH myb-type DNA binding motif  
525-814:NB-ARC domain  
1085-1154:BTB domain  
1248-1292: DUF3420 unknown domain  
1315-1390:Ankyrin repeats

Green-color letters are the locations of the mutations in the mutants of Cd<sup>A529E</sup>, Cd<sup>M357I</sup>, and Cd<sup>L1224R</sup>. Red-color letters are the locations of the mutations in Al<sup>S736L</sup> and Al<sup>R805Q</sup>

-----  
>G703400LC+G470500\_Chr.4A (1,314 aa)  
MGRSPSCGSEAPVKKGPWTEEEEDRLLDVYIKLHGTGGNWRTIPKRAGLNRCGKSCRLRWTNYL  
HPDIKRGPFDDDEEKTTHLHSM LGNKYVYCSLLLLLYTIYLS TIFFSNSGASYSVAADDLSL  
KQVVGDCNPSAGKDRQFYQELLEHEPAQEATPHGHRPHHAQPARRPQPAYRAPQSPRHRRRPQ  
MGRSPSCGSEAPVKKGPWTEEEEDRLLDVYIKLHGTGGNWRTIPKRAGLNRCGKSCRLRWTNYL  
HPDIKRGPFDDDEEKTTHLHSM LGNKYVYCSLLLLLYTIYLS TIFFSNSGASYSVAADDLSL  
KQVVGDCNPSAGKDRQFYQELLEHEPAQEATPHGHRPHHAQPARRPQPAYRAPQSPRHRRRPQ  
MKPLDEDHSRKLFFNRLFGSGSDCPEEFKQVSNEIVDVC GGLPLATINIATHLANQQKAVSLD  
FLTYIRDSLRSQSWSSSASERTRQVLNLSYNDLPHHLKTCLLYLHMYPEGSIVWKDDLKQVW  
AEAFINTRKKGKGDQNWMEKAAGIYFDELVDRRFIQPLNINYNKVL SCTVHEVVRDLLAHKS  
VVVDYNRKNISLSHKARRLSLLFANASYAKTPVNITKAQVRS LN FVGLFECMPCIGEFKVLRV  
LNLQLSGHCGDHPIDLTGISEL FQLRYLKITS DVCIKLPNQMRKLQCLETLDIIDAPRVTAI  
PWDI IYLP HLLH LTL PVD TNLL DWIGSMTGSI ISLWSLGNLNYLQDLYLTISSTHPSGHPEKN  
MEALGSLGGHGNLKIIVVSHGPLVMRAYRSM LSVQSPFLDAVFARRAAEGEDDPLDLRELLG  
EEVEVGYEALQLVLEYLYTGRI RDLPKSACVCADVDGCAHVGCLPAISFMAQVIFAASIFEVA  
VLTNH FQVRL FLLLSVAMISSYHLFIMPAGMHIGKRKGNC SKHGNDVLPVLFNKNLFEAVWRG  
ADMRLLLDVLDDVEVDNLPLILSVANLCNKSCMHLLERCLEMVVRSNLDMITLEKALPPDVIK  
QITDSRISLGLISPKDNGFPNKHVRRIFGALDSYDVELVRL LLYEGQTNLDDAFALHYAVEHC  
DPKITTELLDLELADVNRNRNQRGYTVLHIAARRRNPKILVSVLTKGARPSDLTFDGRKAIQIS  
KRLTKHGDYFGITEEGKPSPEYSLCIEILEQAERRGPQLGEASVSLAIAGDCQRGTLHLLENR  
VTLMRIMFPTEARVAMDIAQVDCTLELTL DSEAKPPSEKEVATIDLNETRFQMND EHLARMSA  
LFKTDKIMNDEPELASLQRDTSTERNRRFRGDMHDTLQKAFSEDKGSSSFDKSGS

15-63:HTH myb-type DNA binding motif  
204-252: HTH myb-type DNA binding motif  
369-514:NB-ARC  
768-841:BTB domain  
992-1036:DUF3420 unknown function domain  
1035-1123:Ankyrin repeats  
1135-1314:NPR1-like-C

-----  
>G023000LC+G019000\_Chr.7D (1,351 aa)  
MGRSPSCSSEPPKKGPWTEEEEDRLLDVYIKLHGTGGNWRTIPKRAGLNRCGKSCRLRWTNYL  
HPDIKRGPFDDDEEKTTHLHSM LGNKWSAIATHLPGRTGNFIKNYWN TNLRKKLLHMGIDPI

THNPRTDLSQLTGLPSLPATAAAPMREFLACRYLIIIDDLWDASAWDI IKYAFPNGNRGSR I  
ITTQIEDVALTCCCDHSEHVMMKPLDDDDHSRKLFFNRLFSGSDCPEEFKQVSNEIVDVCGG  
LPLAMINIASHLANQQTAVSLDFLTYIRDSLRSQSWSSSTSERTRQVLNLSYNNLPHHLKTCL  
LYLHMYPEGSIVWKDDLKQWVAEAFINTRKGKEKDQNWMEKAAGIYFDELI DRRFIQPLNIN  
YNNKVLSTVHEVVRDLLAHKSAEENFIVVVDYNRKNI SLSHKARRLSLLFATARYAKTPVNI  
TKPQVRS LN FVGLFECMPCIGEFKVLRLVNLQLSGHCGDHDPI DLTGISELFQLRYLKITS DV  
CIKLPNQMRKLQCLETLDIIDAPRVTAI PWDIIYLPHLLHLTLPVDTNLLDWIGSMTDSI ISL  
WSLGNLNYLQDLYLTISSTHPSGHPEKNMEALGSLGHHGNLKIIVVSHGPSVKDIVVPGASK  
VIISWDELEPLPLLRQFECSPHSCVIFSRIPKWKKLGNLCLIKIAVVELQMSCVDILRGLPA  
LTALS LYVRCAPAQRILFDKMAGFSVLKYFKLRFTSGIPWLKFEADAMPNLWKLKLGFNAI PR  
MDQHQLIRIEHMPDLKEISVKFGGIAALIEYAVKTVISNHLRNPRVHVCLVTSTSYGDESTKE  
KPPTNSAVEMRAYRSVLSVRS PFLDAIFARRAAE GEGNPLDLRELLGEEVEVGYEALQLVLEY  
LYTGCIRDLPKSACVCAVDGCAHVGC LPAISFMAQVIFAASIFQVAVLTNHFQVRLFLLSV  
AMISSYHLFIMPAGMHIGILVLT FHDDL CVYHLRIILVESLLRLLLDVLDDEVDNLPLILSV  
ANLCNKSCMHLLERCLEMVVRSNLDMITLEKALPSDIEEQITDSRLSLGLVSPEDKGF PNKHV  
RRILRALDSDDVCLVRMLLKEGRTNLDGAFALHHA VEHCDSKVTMELLDIGLADVNRNPRGY  
TVLHVAARRRDPKILVSVLTKGARHSDLTFDGRKAVQISKRLTKHGDYFGITEEGKPSREDRL  
CIKILEQAERRDPQLGEASVSLAIAGDRQRGKLLYLENRVALMRIMFPTEARIAMDIAQV DCT  
LKLTLD SGAKPPPEKELATIDLNETPFHMNEEHLARMSTLSKTDKIMDDEPELAPLQRDASTE  
RTRRFGLQDAVQKALSEDKASF DKS GS

- 15-63: HTH Myb-like DNA binding domain
- 69-114: HTH Myb-like DNA binding domain
- 146-347:NB-ARC domain
- 828-886:BTB domain
- 1031-1075:DUF3420 unknown domain
- 1098-1173:Ankyrin repeats
- 1174-1351:NPR1-like domain

-----  
>G021700\_Chr.7A (1,107 aa)  
MEAAAATAFVVGRIAPKLEFLAANHKLRQNLEHDITYIQREFALISA AIQQDDDCRWRSGDHV  
KRAWIQIIRDLAHAIEDCIDRFMHRVTISGASTWIRQAVHRVQTVTVRKEFAKAIRELKKISQ  
ESSKLRETYYSANIGAGTSSSSVASSVMACETATQMVIDD TLSAGQPVGMDAPWEELELIQQ  
QQQLKVISIVGFDGIGKTL LARCVYDTIENQYEARAWVSAAEQGVPTNVIKEILQQFAIPTN  
GGNLSKLCAILRLYLGT KRFFIVIDDMRTEFWHDIKDAFVGLSGRVLVTTAIHVSANACSSS  
AAHDHVYAMKTLADEHSRLLFFKEAFQDDNPPIDKEDQLGSEALKKCDGLPLALVTTARYLQS  
TGNPHTGNWATLCHNLGAHLETKEMLARMKRVLVHSYTSLVKHDVKTCLLYLGIYRSGRTVRR  
GSLIRKWCAEGFIQGDYMCNALDAAKANFKELLNRSIIKHTDASSKNNKDQVKTYH THGMMLE  
FILHMSKCDNFITLLYDQMAPPPPSKIRWLSLHDASARVVNDLSLVRSLTVFGKAHDSVLDL  
SKYELLRVLDLEEC SNHLEDKHLREICSNLLLLRYLSLGA AHKVAVLPKEIKKLQ LLETLDVR  
KTKIEVLPTQVMELPCLIH LFGKFKLQQGVGGRKM HKLQIWFSENSKLETVAGFVVDSNKSQG  
FAQFMEHMKHLTKVKIWCEQSSNNSRDPTASGSSSNTN NYTHVSKAIKGFIKRSTDVKKAHSL  
SLHCNDKWFQDLLVNLSLEKEEASSCYLSS LKLGGNICSLPPFVTMLGGLTKLCLSSPHHQ L  
GGDILVALSRVRCLAYLKMIASQLDNLVIVEGALGNLRQLCIVVEVMTELEVQEGALPLLES L  
QLLCKDLNGFCSKMIQSLRRIKEVTLHDGVNGETKQKWKEAAKKHPRRPNLLFVKTAEDADMG  
SEPADNSESPVAQTTATTVSVIT TQDAISTGQSVQVDGADLQQGDEKEHAYKIDILEDFASKT

CLDPPMNTESFEQMEGMVGLERMEDVTHSTDQADQNVVLSVVGENRRKRARLDIGEDNSM  
DKVVDRVKRKKPEDVQEPRLKARPRGRQVAVGAEDL

6-119:Rx-CC-like domain

176-458:NB-ARC domain

-----  
>G018900\_Ch1.7D (1,103 aa)

MEAAAATAFACRIAPKLLAFLATNHKLRQNLEHDITYIRNEFALISAAIQDDHRWRSRPSR  
DHMQRAWVKIIRDLAHAVEDCIDRFMHRVTISGTSTWLRQAVHRVQTVTVRKEFAKAIREIKK  
ISQESSKLRETYYSASIAAGTSSCSAASSSVASETTTQMAIDDTLSAGRSVGM DAPQDELLEL  
IQQQQQQLKVISIVGFHGIGKTL LARRVYHRMENQYEARAWVSAAKQGVPTNVLKQILQQLGI  
PTNGGGNFNKLCAVLRRLYLGSKRFFIVIDD MQTEFWHDIKDI FVGLSGRVLVTTAIQSVANAC  
SSSAAHDHVYAMKTLADEHSRLLFFKEAFQDDNPPVNKEDQLGSEALKKCDGLPLALVTTARY  
LQSTGNPTRENWATLCHNLGVHLETKEMLARMKCALVHSYTSLVKHDVKTCLLYLGIYHTGRT  
VRRGNLIRKWCAEGFIQGDYMCNALDAAVANFRELVNRSIIQRTDASSKNIKDQVKTYRTHGM  
MLEFILHMSKCDNFITLLYDQLAPPPPPSKVRWLSLHDASARVANDLSLVRSLTVFGKAHESV  
LYFSKYELLRVL DLEECGNHLEDKHLREICNNLLLLRYLSLGAALTVTVLPKEIKKLQLLET  
DVRRTRIEILPTQVMELPCLIH LFGKFKLQQGVGGRKMLKLQTWCSENSKLETVAGFVVDNNK  
SQGFAQLMEHMKHLTKVKIWCQQSTNNSMDPISSGSSSSSKYTHLSEAIKGFIKRSTDKKAHS  
LSLSFNDRWCQDLLVNLSLEKEQASSCYLSSLKVQGGNICSLPPFVTMLGGLTSLCLSSPHHQ  
LSGDILAALS RVRCLAYLR LIASQLGKLVIVRGALGSLRRLCIVVEVMTELEVQEGALPLLES  
LQLLCKDLNGFCSIMI QSLGRIKEVT LHDGVNDETRQKWKEAAKNHPRRPKLLFVKTAEDVDM  
GSEPADNSESP TVPTNDTTL PVTAPHDAI STGQSVQVDGDDLQQDDDEKEDTDKIDMLVDFVS  
KTCLGTMNKESFEQMEGMVVG ENRRKRARTV GEGNSMDKVFDRVKRKNPEDI PVKLGSRLE  
VIFWSWALKFTGDVRNLVAVGDVALIWTIWR C

6-119:Rx-CC-like domain

179-461: NB-ARC domain

-----  
>G470600\_Ch1.4A (1,057 aa)

MEAAAATAFACRIAPKLLAFLAANHKLRQNLEHDITYIRNEFALISAAIQDDHRWRSRPSR  
DYMQRRAWVKIIRDLAHAVEDCIDRFMHRVTISGTSTWLRQAVHRVQTVTVRKEFAKTIRELKK  
ISQESSKLRETYYSASIAAGTSSYSAASSSVASETMTQMAKDDTLSAGRSVGM DAPQDELLEL  
IQQQQQQLKVISIVGFHGIGKTL LARRVYHTIENQYQARAWVSAAEQGFPTNVLKQILQQLGI  
PSNGGGNFNKLCTVLRRLYLRSKRFFIVIDD MQTEFWHDIKDI FVGLSGRILVTTAIQSVANAC  
SSSAAHDHVYAMKTLADEHSRLLFFKEAFQDDNPPVNKEDQLGSEALKKCDGLPLALVTTARY  
LQSTGIYPTGRTVRRGNLIRKWCAEGFIQGDYMCNALDTAVANFKELVNRSIIQRTDASSKNI  
KDQVKTYHTHGM MLEFILHMSKCDNFITLLYDQLAPPPPPSKIRWLSLHDASARVANDLSLVR  
SLTVFGKAHESVLYFSKYELLRVL DLEECGNHLEDKHLREICNNLLLLRYLSL GATLTVTVLP  
KEIKKLQLLETLDVRRTRIEILPTQVMELPCLIH LFGKFKLQQGVGGRKMHKLQTWSSKNSKL  
ETVAGFVVDNNKSQGFAQLMEHMKHLTKVKIWCQQSTNNSMDPISSGSSSSSKYTHLSEAIKG  
FIKRSTDKKAHSLSLNFNDRWCQDLLVNLSLEKEEASSCYLSSLKVQGGNICSLPPFVTMLGG  
LTSLCLSSPHHQ LSGDILAALS RVRCLAYLKL IASQLGKLVIVKGALGSLRRLCIVVEVMTEL  
EVQEGALPLLES LQLLCKDLNGFCSMMIQSLGRIKEVT LHDGVNDETKQKWKEAAKHP RYPK  
LLFVKTTEDVDMGSEPADNSESP TVPTNGRTL PMTAPHDAI STGQSVQVDGDDLQQDDDEKED  
TDKIDMLADFASKTCLGTMNKESFEQMEGMVGLDDQQMEDVTPSTQADQSLVLLLVG ENR  
RKRARTV GEGNSMDKVFDRVKRKNLEDPETRP TKQTAPGLAVAI SDGN

6-119:Rx-CC-like domain  
179-383:NB-ARC domain
