# Supplementary material for: A new mode of NPR1 action via an NB‐ARC–NPR1 fusion protein negatively regulates the defence response in wheat to stem rust pathogen
Source: PubMed Central journal article supplement — New Phytol. 2020 Aug 26;228(3):959–72. doi: 10.1111/nph.16748 (PMC7589253; doi:10.1111/nph.16748), 2020-08-26
Supplement: NPH-228-959-s003.pdf [file NPH-228-959-s003.pdf]

## New *Phytologist* Supporting Information

Article title: **A new mode of NPR1 action via an NB-ARC-NPR1 fusion protein negatively regulates defense response to stem rust pathogen in wheat**

Authors: Xiaojing Wang, Hongtao Zhang, Bernard Nyamesorto, Yi Luo, Xiaoqian Mu, Fangyan Wang, Zhensheng Kang, Evans Lagudah and Li Huang

Article acceptance date: 01 June 2020

**Notes S2:** The alignment of the cDNAs of the *TaG3NPR1* genes and the location of the target region for silencing.

```
CLUSTAL O(1.2.4) multiple sequence alignment
TraesCS3A02G105400.1   ATGGAGGCCCGAGCAGCCACGTACCGCTCCTTCTCCGACTGCGACGACAGCGTCTCC   60
TraesCS3B02G123800.1   ATGGAGGCCCGAGCAGCCACGTACCGCTCCTTCTCCGACTGCGACGACAGCGTCTCC   60
TraesCS3D02G107500.1   ATGGAGGCCCGAGCAGCCACGTACTGCCTCCTTCTCCGACTGCGACGACAGCGTCTCC   60
*****
TraesCS3A02G105400.1   ATGGGGACGCGCGCCGGACGCGGACGTGGAGGCGCTCCGCCCTCTCCGACAACCTC   120
TraesCS3B02G123800.1   ATGGAGGACGCGCGCCGGACGCGGACGTGGAGGCGCTCCGCCCTCTCCGACAACCTC   120
TraesCS3D02G107500.1   ATGGGGACGCGCGCCGGACGCGGACGTGGAGGCGCTCCGCCCTCTCCGACAACCTC   120
****
TraesCS3A02G105400.1   GCCGCCCTTCCGCTCGCCGACGACTTCGCTTCTCTCGCCGACGCGCTCGTCGCCGTG   180
TraesCS3B02G123800.1   GCCGCCCTTCCGCTCGCCGACGACTTCGCTTCTCTCGCCGACGCGCTCGTCGCCGTG   180
TraesCS3D02G107500.1   GCCGCCCTTCCGCTCGCCGACGACTTCGCTTCTCTCGCCGACGCGCTCGTCGCCGTG   180
*****
TraesCS3A02G105400.1   CCGGGCGCGCCGACCTGCGGTGACCGCTGCGTGCTGTCGCGCGGAGCCCTTCCTG   240
TraesCS3B02G123800.1   CCGGGCGCGCCGACCTGCGGTGACCGCTGCGTGCTGTCGCGCGGAGCCCTTCCTG   240
TraesCS3D02G107500.1   CCGGGCGCGCCGACCTGCGGTGACCGCTGCGTGCTGTCGCGCGGAGCCCTTCCTG   240
*****
TraesCS3A02G105400.1   CGCGCCCTTCAAGCGCGCGCCGCGCGC-----CGGTTCGTCGCGCGCGCG   291
TraesCS3B02G123800.1   CGCGCCCTTCAAGCGCGCGCCGCGCGC-----CGGTTCGTCGCGCGCGCG   291
TraesCS3D02G107500.1   CGCGCCCTTCAAGCGCGCGCCGCGCGC-----CGGTTCGTCGCGCGCGCG   300
*****
TraesCS3A02G105400.1   GAGGGCAACTGGTTGAGCTCCGGAGCTTCTCGGACGAGGTCGAGGTCGGGTACGAG   351
TraesCS3B02G123800.1   GAGGGCAACCGGCTGGAGCTCCGGAGCTTCTCGGACGAGGTCGAGGTCAGGTACGAG   351
TraesCS3D02G107500.1   GAGGGCAACCGGTTGAGCTCCGGAGCTTCTCGGACGAGGTTGAGGTCGGGTACGAG   360
**** ** ** ***** ***** *****
```

|                      |                                                              |     |
|----------------------|--------------------------------------------------------------|-----|
| TraesCS3A02G105400.1 | GCGCTGGAGCTGGTGCCTGACTACCTATACAGCGGCCGCGTCCGGACCTCCCAAGTCG   | 411 |
| TraesCS3B02G123800.1 | GCGCTGGAGCTGGTGCCTGACTACCTGTACAGCGGCCGCGTCCGGACCTCCCAAGTCG   | 411 |
| TraesCS3D02G107500.1 | GCGCTGGAGCTGGTGCCTGACTACCTGTACAGCGGCCGCGTCCGGACCTCCCAAGTCG   | 420 |
|                      | *****                                                        |     |
| TraesCS3A02G105400.1 | GCGTGGCCTGCGTCGACGTCGACGGGTGCGCGCACGTGGTCCACCCCGCCGTCTCC     | 471 |
| TraesCS3B02G123800.1 | GCGTGGCCTGCGTCGACGAGGGCGGTGCGCGCACGTGGTCCACCCCGCCGTCTCC      | 471 |
| TraesCS3D02G107500.1 | GCGTGGCCTGCGTCGACGTCGACGGATGCGCCACGTGGTCCACCCCGCCGTCTCC      | 480 |
|                      | ***** * ** *****                                             |     |
| TraesCS3A02G105400.1 | TTCATGGCGCAGGTCCTCTTCGCCGATCCACCTCCAGATCGGCGAGCTGCCAGCCTC    | 531 |
| TraesCS3B02G123800.1 | TTCATGGCGCAGGTCCTCTTCGCCGATCCACCTCCAGTGGCGAGCTGCCAACCTC      | 531 |
| TraesCS3D02G107500.1 | TTCATGGCGCAGGTCCTCTTCGCCGATCCACCTCCAGTGGCGAGCTGCCAGCCTC      | 540 |
|                      | ***** ***** **                                               |     |
| TraesCS3A02G105400.1 | TTCCAGCGCATCTCCTTGATTTCCTTGATAATGTTGAAGTGATAACCTCCGTTGATC    | 591 |
| TraesCS3B02G123800.1 | TTCCAGCGCATCTCCTTGATTTCCTTGATAAAGTTGAAGTGATAACCTCCGTTGATC    | 591 |
| TraesCS3D02G107500.1 | TTCCAGCGCATCTCCTTGATTTCCTTGATAAAGTTGAAGTGATAACCTCCATTGGTC    | 600 |
|                      | ***** ***** ** *                                             |     |
| TraesCS3A02G105400.1 | TTATCTGTGCAAACCTTATGCAACAAATCTGCGTGAAACTGTTGAGAGATGCCTGGAG   | 651 |
| TraesCS3B02G123800.1 | TTATCTGTGCAAACCTTATGCAACAAATCTGCGTGAAACTGTTGAGAGATGCATGGAG   | 651 |
| TraesCS3D02G107500.1 | TTATCTGTGCAAACCTTATGCAACAAATCTGCGTGAAACTGTTGAGAGATGCCTGGAG   | 660 |
|                      | ***** ***** **                                               |     |
| TraesCS3A02G105400.1 | ATAGTAGTCCGGTCAAATCTTGACATGATTACTCTTGAGAAAGCATTGCCTGAAGATGTT | 711 |
| TraesCS3B02G123800.1 | ATGGTAGTCCGGTCAAATCTTGACATGATTACTCTAGAGAAAGCATTGCCTCAAGATGTC | 711 |
| TraesCS3D02G107500.1 | ATGGTAGTCCAGTCAGATCTTGACATGATTACTCTAGAGAAAGCATTGCCTCAAGATGTT | 720 |
|                      | ** ***** ** *****                                            |     |
| TraesCS3A02G105400.1 | ATCAAGCAAATTATTGATTACGGATAACTCTTGATTAGCTTCACCCGAAGACAATGGC   | 771 |
| TraesCS3B02G123800.1 | ATCAAGCAAATTACTGATTACGGATAACTCTTGATTAGCTTCACCCGAAGACAATGGC   | 771 |
| TraesCS3D02G107500.1 | ATCAAGCAAATTACTGATTACGGATAACTCTTGATTAGCTTCACCCGAAGACAATGGC   | 780 |
|                      | ***** *****                                                  |     |
| TraesCS3A02G105400.1 | TTTCTAACAAACACGTAAGAAGGATACTCAAGCACTTGATTCTGATGATGTTGAGCTT   | 831 |
| TraesCS3B02G123800.1 | TTTCTAACAAACACGTAAGAAGGATACTCAGAGCACTTGATTCTGATGATGTTGAGCTT  | 831 |
| TraesCS3D02G107500.1 | TTTCTAACAAACACGTAAGAAGGATACTCAGAGCACTTGATTCTGATGATGTTGAGCTT  | 840 |
|                      | ***** *****                                                  |     |
| TraesCS3A02G105400.1 | GTCAGGATGCTGCTCACAGAAGGGCAGACTAACCTTGACGATGATTGCACTGCACTAT   | 891 |
| TraesCS3B02G123800.1 | GTCAGGATGCTGCTCACAGAAGGGCAGACTAACCTTGATGATGATTGCACTGCACTAT   | 891 |
| TraesCS3D02G107500.1 | GTCAGGATGCTGCTCACAGAAGGGCAGACAAACCTTGATGATGATTGCACTGCACTAT   | 900 |
|                      | ***** *****                                                  |     |

TraesCS3A02G105400.1 GCTGTAGAACACTGTGACTCAAAAATTACAACAGAACTTCTGGACATCGCACTTGCGGAT 951  
TraesCS3B02G123800.1 GCTGTAGAACACTGTGACTCAAAAATTACAACAGAACTTCTGGACATCGCACTTGCGGAT 951  
TraesCS3D02G107500.1 GCTGTAGAACACTGTGACTCAAAAATTACAACAGAACTTCTGGACATCGCACTTGCGGAT 960

\*\*\*\*\*

TraesCS3A02G105400.1 GTTAATCTCAGAAACCAAGAGGTATACTGTTCTTCACATCGCTAGGCGGAGAGAT 1011  
TraesCS3B02G123800.1 GTTAATCTCAGAAACCAAGAGGTATACTGTTCTTCACATCGCGCTAAGCGGAGAGAT 1011  
TraesCS3D02G107500.1 GTTAATCTCAGAAACCAAGAGGTATACTGTTCTTCACATCGCGCTAAGCGGAGAGAT 1020

\*\*\*\*\* \*\*

TraesCS3A02G105400.1 CCTAAAATGTTGTCCTCCTTTTAACCAAGGTGCTCGGCCTCTGATATTACATTTGAT 1071  
TraesCS3B02G123800.1 CCTAAAATGTTGTCCTCCTTTTAACCAAGGTGCTCGGCCTCTGATATTACATTTGAT 1071  
TraesCS3D02G107500.1 CCTAAAATGTTGTCCTCCTTTTAACCAAGGTGCTCGGCCTCTGATATTACATTTGAT 1080

\*\*\*\*\* \*\* \*

TraesCS3A02G105400.1 GGAAGAAAAGCAGTTCAAATCGCAAAGAGACTCAGAAAACATGGGGATTATTTGGGAAT 1131  
TraesCS3B02G123800.1 GGAAGAAAAGCAGTTCAAATCGCAAAGAGACTCAGAAAACATGGGTATTATTTGGGAAT 1131  
TraesCS3D02G107500.1 GGAAGAAAAGCAGTTCAAATCGCAAAGAGACTCAGAAAACATGGGGATTATTTGGGAAT 1140

\*\*\*\*\*

G3-01 igF

TraesCS3A02G105400.1 ACTGAAGAAGGAAGCCGCTCCCAATGATAAAATTATGCATTGAGACTGGAGCAAGCT 1191  
TraesCS3B02G123800.1 ACTGAAGAAGGAAGCCGCTCCCAATGATAAAATTATGCATTGAGATATTGGAGCAAGCT 1191  
TraesCS3D02G107500.1 ACTGAAGAAGGAAGCCGCTCCCAATGATAAAATTATGCATTGAGATATTGGAGCAAGCT 1200

\*\*\*\*\* \*\*

TraesCS3A02G105400.1 GAAAGAAGGGATCCCAACTGGAGAAGCATCGGTTTCTCTTGCAATGGCTGGTACTGT 1251  
TraesCS3B02G123800.1 GAAAGAAGGGATCCCAACTGGAGAAGCATCACTTCTCTTGCAATGGCTGGTACTGT 1251  
TraesCS3D02G107500.1 GAAAGAAGGGATCCCAACTGGAGAAGCATCGGTTTCTCTTGCAATGGCTGGTACTGT 1260

\*\*\*\*\*

TraesCS3A02G105400.1 CTTCTGGGAAGTTACTGTACCTTGAAAACCGAGTTGCTTTGGCAAGGATAATGTTTCCA 1311  
TraesCS3B02G123800.1 CTTCTGGGAAGTTACTGTACCTTGAAAACCGAGTTGCTTTGGCAAGGATAATGTTTCCA 1311  
TraesCS3D02G107500.1 CTTCTGGGAAGTTACTGTACCTTGAAAACCGAGTTGCTTTGGCAAGGATAATGTTTCCA 1320

\*\*\*\*\* \*

TraesCS3A02G105400.1 ATTGAGGCAAGAGTAGCAATGGACATTGCTCAAGTGGATGGTACTTTGGAATTTACCCTT 1371  
TraesCS3B02G123800.1 ATTGAGGCAAGAGTAGCAATGGACATTGCTCAAGTGGATGGTACTTTGGAATTTACCCTT 1371  
TraesCS3D02G107500.1 ATTGAGGCAAGAGTAGCAATGGACATTGCTCAAGTGGATGGTACTTTGGAATTTACCCTT 1380

\*\*\*\*\*

G3-01 igR

TraesCS3A02G105400.1 GGTCTAGTACAATCCACCTCTGGAGATAACAACCGTTGATCTAAATGATACTTCTTTC 1431  
TraesCS3B02G123800.1 GGTCTAGTACAATCCACCTCTGGAGATAACAACCGTTGATCTGAATGATACTTCTTTC 1431  
TraesCS3D02G107500.1 GGTATAGTACAATCCACCTCTGGAGATAACAACCGTTGATCTAAATGATACTTCTTTC 1440

\*\*\* \* \*\*\*\*

TraesCS3A02G105400.1 AAATGAAGGAGGAACACTTAGCTCGGATGAGAGCCCTCCAAAACAGTCGAAGTCGGC 1491  
TraesCS3B02G123800.1 AAAATGAAGGAGGAACACTTAGCTCGGATGAGAGCCCTCCAAAACAGTTGAACTCGGC 1491  
TraesCS3D02G107500.1 AAAATGAAGGAGGAACACTTAGCTCGGATGAGAGCCCTCCAAAACAGTGGAACTCGGC 1500

\*\*\*\*\* \*\*

TraesCS3A02G105400.1 AAACGTTTTTCCCGCGCTGTCAAATAAATTGGACAAGATCATGGATGATGAACCTGAG 1551  
TraesCS3B02G123800.1 AAACGTTTCTCCACGCTGTCAAATGTGCTGGACAAGATCATGGACGATGAACCTGAG 1551  
TraesCS3D02G107500.1 AAACGTTTCTCCCGCGCTGTCAAATGTGCTGGACAAGATCATGGACGATGAACCTGAG 1560

\*\*\*\*\* \*\*

TraesCS3A02G105400.1 CTGGCTTCGCTCGGAAGAGATGCATCCTCAGAGAGGAGGAGGTTTCATGACCTGCAA 1611  
TraesCS3B02G123800.1 CTGGCTCCCTCGGAAGAGATGCATCCTCCGAGAGGAGGAGGTTTCACGACCTGCAA 1611  
TraesCS3D02G107500.1 CTGGCTTCGCTCGGAACAGATGCATGCTCCGAGAGGAGGAGGTTTCACGACCTGCAA 1620

\*\*\*\*\* \*\*

TraesCS3A02G105400.1 GATGCGCTCCTGAAGGCGTTACGCGAGGACAAGGAGGAGTTTAAACAAAACGACAACCTT 1671  
TraesCS3B02G123800.1 GATACGCTTCTGAAGGCGTTACGCGAGGACAAGGAGGAGTTTAAACAGAACGACAACCTT 1671  
TraesCS3D02G107500.1 GATACGCTTCTGAAGGCGTTACGCGAGGACAAGGAGGAGTTTAAACAGAACGACAACCTT 1680

\*\*\* \*\*

TraesCS3A02G105400.1 TCATCTTCCTCATCGTCGACGTCCACTGTAGCAAGGAACTTGACAGGCCGGCTAGGAGA 1731  
TraesCS3B02G123800.1 TCATCTTCGTATCGTCGACGTCCACTGTAGCAAGGAACTTGGCAGGTCGAACTAGGAGA 1731  
TraesCS3D02G107500.1 TCATCTTCGTATCGTCGACGTCCACTGTAGCAAGGAACTTGGCAGGTCGAACTAGGAGA 1740

\*\*\*\*\* \*\*

TraesCS3A02G105400.1 TGA 1734  
TraesCS3B02G123800.1 TGA 1734  
TraesCS3D02G107500.1 TGA 1743

\*\*\*
