# Supplementary material for: A new mode of NPR1 action via an NB‐ARC–NPR1 fusion protein negatively regulates the defence response in wheat to stem rust pathogen
Source: PubMed Central journal article supplement — New Phytol. 2020 Aug 26;228(3):959–72. doi: 10.1111/nph.16748 (PMC7589253; doi:10.1111/nph.16748), 2020-08-26
Supplement: NPH-228-959-s004.pdf [file NPH-228-959-s004.pdf]

## New *Phytologist* Supporting Information

Article title: **A new mode of NPR1 action via an NB-ARC-NPR1 fusion protein negatively regulates defense response to stem rust pathogen in wheat**

Authors: Xiaojing Wang, Hongtao Zhang, Bernard Nyamesorto, Yi Luo, Xiaoqian Mu, Fangyan Wang, Zhensheng Kang, Evans Lagudah and Li Huang

Article acceptance date: 01 June 2020

**Notes S3:** The alignment of the cDNAs of the *TaG7NPR1* genes and the location of the target region for silencing.

CLUSTAL O(1.2.4) multiple sequence alignment

```
G7ANBS-cDNA2          ATGGGTGCGTGCCTCCTCCACCGGTGTCGCCGGCGTGAAGAAGGGCCCGTGGACGGTA      60
TRIAE_CS42_4AL_TGACv1_288580_AA0952690.1  ATGGGGAGGTACCGTCTCGGTAGTGAGGCCCCCGTCAAGAAGGGCCCGTGGACGGAG      60
TRIAE_CS42_7DS_TGACv1_622487_AA2040690.1  ATGGGGAGGTGCGCGTCTGTCAGCAGTGAGCCCCCTTGAAGAAGGGCCCATGGACGGAG      60
***** ** * ** * * * * * ** * * * **

G7ANBS-cDNA2          GAGGAGGATATACTGCTATAAATACTTCCAGAGGCATGGCAACGGCGGCAACTGGCGA      120
TRIAE_CS42_4AL_TGACv1_288580_AA0952690.1  GAGGAGGACAGGCTGCTCGTGGACTACATCAAGTTGCATGGCACCGGCGCAACTGGCGA      120
TRIAE_CS42_7DS_TGACv1_622487_AA2040690.1  GAGGAGGACAGGCTGCTCGTGGACTACATCAAGTTGCATGGCACCGGCGCAACTGGCGA      120
***** * * ** * * * ** * * * **

G7ANBS-cDNA2          ACCTTGCCCCAGTGCGCCGGCTGAACCGCTCCGGCAAGAGTGCCGCTCCGCTGGACC      180
TRIAE_CS42_4AL_TGACv1_288580_AA0952690.1  ACCATCCCCAAGCGCGTGGCCTCAACCGTGCAGCAAGAGTGCCGCTCCGTTGGACC      180
TRIAE_CS42_7DS_TGACv1_622487_AA2040690.1  ACCATCCCCAAGCGCGCCTCAACCGTGCAGCAAGAGTGCCGCTCCGTTGGACC      180
*** * ** * * ** * ** * **

G7ANBS-cDNA2          AACTACCTCCGCCCAACATCAAGCGGGAACCTTACCAGATGAGGAGAAAACCATC      240
TRIAE_CS42_4AL_TGACv1_288580_AA0952690.1  AACTACCTCCACCCGACATCAAGCGGACCCTTACCAGATGAGGAGAAAACCATC      240
TRIAE_CS42_7DS_TGACv1_622487_AA2040690.1  AACTACCTCCACCCGACATCAAGCGGACCCTTACCAGATGAGGAGAGAAAACCATC      240
***** ** * ** * ** * ** * **

G7ANBS-cDNA2          ATACACCTCCACTCCATTCACGGGAACAAGTGGTCGGCGATCGCGACTATTGCCGGGG      300
TRIAE_CS42_4AL_TGACv1_288580_AA0952690.1  ATCCACCTCCACTCCATGCTCGGCAACAAGTGGTCGGCGATTGCAACCCATCTGCCGGGA      300
TRIAE_CS42_7DS_TGACv1_622487_AA2040690.1  ATCCACCTCCACTCCATGCTCGGCAACAAGTGGTCGGCGATTGCAACCCATCTGCCAGGA      300
** ***** * ** ***** ** * ** * **

G7ANBS-cDNA2          AGAACAGGCAATTTATCAAGAATTACTGGAACACGAACTGCGCAAGAAGTCTCCAG      360
TRIAE_CS42_4AL_TGACv1_288580_AA0952690.1  AGGACAGGCAATTTATCAAGAATTACTGGAACATGAACTGCGCAAGAAGTCTCCAC      360
TRIAE_CS42_7DS_TGACv1_622487_AA2040690.1  AGGACAGGCAATTTATCAAGAATTACTGGAACACAACTGCGCAAGAAGTCTCCAC      360
** ***** ***** *****

G7ANBS-cDNA2          ATGGGCATCAACCCCGTCACGCACCGACACTGAC---CTCAGCATGCTCAAGGGGCTC      417
TRIAE_CS42_4AL_TGACv1_288580_AA0952690.1  ATGGGCATCGACCCATCACGCACAGCCCGCGCGGACCTCAGCCAGCTTACAGGGCTC      420
```

|                                          |                                                              |     |
|------------------------------------------|--------------------------------------------------------------|-----|
| TRIAE_CS42_7DS_TGACv1_622487_AA2040690.1 | ATGGGCATGACCCCATCAGCACAACCCGGCACCACCTCAGCCAGCTTACAGGGCTC     | 420 |
|                                          | ***** ** * ** * ** * ** * ** *                               |     |
| G7ANBS-cDNA2                             | CCGGCCTGCACGCCGT-----GCCCGGTAATAGCCTCTCCTTGGTGTCAGCATG       | 471 |
| TRIAE_CS42_4AL_TGACv1_288580_AA0952690.1 | CCAGTCTCCCGCCACCGCCGCCCCAGTAATAGCCTCTC---CGGCGTCAGCATG       | 477 |
| TRIAE_CS42_7DS_TGACv1_622487_AA2040690.1 | CCAGTCTCCCGCCACCGCCGCCCCAGTAATAGCCTCTC---CAGCGTCAGCATG       | 477 |
|                                          | ** * * * * ** * ** * ** * ** * ** *                          |     |
| G7ANBS-cDNA2                             | -----GGCACCAGGCACAGCCACACCAACGCGGCCAGCTTCGCC                 | 513 |
| TRIAE_CS42_4AL_TGACv1_288580_AA0952690.1 | GGCCCCAGCGCTGGGACATGAATGCTGTCCAGGCCACGCGCAGTGGCCAGCTTCGCC    | 537 |
| TRIAE_CS42_7DS_TGACv1_622487_AA2040690.1 | CCCCCAGCACCTGGGACATGAATGCTGCCAGGCCACGCTGACGTGGCCAGCTTCGCC    | 537 |
|                                          | * * ** * ** * ** * ** * ** *                                 |     |
| G7ANBS-cDNA2                             | GGGAGCAGCTCGGACATGAACACTCTCGGGATCAAGGACAAAGCAGCCAGCTTCGCCGG  | 573 |
| TRIAE_CS42_4AL_TGACv1_288580_AA0952690.1 | GGGGGCGGCTCGGACATGAACACTCTCAGGATCAAGGACGAAGTACCAGCTTCACCGC   | 597 |
| TRIAE_CS42_7DS_TGACv1_622487_AA2040690.1 | GGGGG-----GGTCTCAGGATCAAGGACGAAGTACCAGCTTCACCGC              | 582 |
|                                          | ** * ** * ** * ** * ** * ** *                                |     |
| G7ANBS-cDNA2                             | AGCAGCAGCTCGGACATGACTACTCTCGGGTCAAGGACGAAGCCGCGCAGCTTCAGTGC  | 633 |
| TRIAE_CS42_4AL_TGACv1_288580_AA0952690.1 | ---AGTACTCAGACATGAAACCTCCAGGATCAAGGATGAAGCCAGCAGCTTCACCGT    | 654 |
| TRIAE_CS42_7DS_TGACv1_622487_AA2040690.1 | ---AGTACTCAGACATGAAACCTCCTATGATCAAGGATGAAGCCAGCAGCTTCACCGC   | 639 |
|                                          | ** ** * ** * ** * ** * ** * ** * ** *                        |     |
| G7ANBS-cDNA2                             | AGCCACTCAGACATGAAACCTCCAGGATCAAGGACAAAGCCGCGCAGCTTACCGCAAC   | 693 |
| TRIAE_CS42_4AL_TGACv1_288580_AA0952690.1 | AGCCACTCGGAAATGAAACCTCCAGAATCAAGTACGAAGCCGCGCAGCTTACAGTAGC   | 714 |
| TRIAE_CS42_7DS_TGACv1_622487_AA2040690.1 | AGTACTCGGAACTGAAACCTCCAGGATCAAGTACGAAGCCAGCTTACCGGTAGC       | 699 |
|                                          | ** * ** * ** * ** * ** * ** * ** * ** *                      |     |
| G7ANBS-cDNA2                             | TACTCGAAGATGAAACCTTTCAGGATCAAGGACGAAGCCAGCTTCACTGGCAGCTAC    | 753 |
| TRIAE_CS42_4AL_TGACv1_288580_AA0952690.1 | CACTCGGACATGAAACCTCCAGGATCAAGGACGAAGCCGCGCAGCTTCACTGGAAGACAC | 774 |
| TRIAE_CS42_7DS_TGACv1_622487_AA2040690.1 | CACTCGGACATGAAACCTCAGGATCAAGGACGAAGCCGCGCAGCTTCACTGGCAGACAC  | 759 |
|                                          | ***** * ** * ** * ** * ** * ** * ** * ** *                   |     |
| G7ANBS-cDNA2                             | TCGGACATGAATCTCTCAGGATCAAGGACGAAGCCAGCTTACAGGACGCTACTCG      | 813 |
| TRIAE_CS42_4AL_TGACv1_288580_AA0952690.1 | TCGGACATGAAACCTCTCAGGATCAAGGACGAAGCCGCGCTGCTTACCGGACGCTACTCG | 834 |
| TRIAE_CS42_7DS_TGACv1_622487_AA2040690.1 | TCGGACATGAAACCTCTCAGGATCAAGGACGAAGCCGCGCTTACCGGACGTTGCTCG    | 819 |
|                                          | ***** ** * ** * ** * ** * ** * ** * ** *                     |     |
| G7ANBS-cDNA2                             | GACATTAATCTGTGAGTCTCAGGACGAAACACCAGCTTCACTGGCAGCTACTCGGC     | 873 |
| TRIAE_CS42_4AL_TGACv1_288580_AA0952690.1 | GACAGGAAACCTCCAGGATCCAGGACGAAG-----GCAGTACTCAGGC             | 879 |
| TRIAE_CS42_7DS_TGACv1_622487_AA2040690.1 | GACAGGAAACCTCCAGGATCCAGGACGAAG-----GCAGTACTCAGGC             | 864 |
|                                          | ** * ** * ** * ** * ** * ** * ** * ** *                      |     |
| G7ANBS-cDNA2                             | ACCGCAGTGGCTGGGACATGAATGCTCTCCGGGCTCAGGCCGACCCGACAAGTTC      | 933 |

|                                          |                                                               |      |
|------------------------------------------|---------------------------------------------------------------|------|
| TRIAE_CS42_4AL_TGACv1_288580_AA0952690.1 | GCTGTTGCTGGCTGGGACATGAACACTCTCTCCATGCTCCAGCCCAACACCGCCAAGTTC  | 939  |
| TRIAE_CS42_7DS_TGACv1_622487_AA2040690.1 | GCTGGTGCTGGTTGGGACATGAACACTCTCTCCATGCGCCAGTCCAACGCGCCAAGTTC   | 924  |
|                                          | * * **** ***** ***** ** ** * * * * *                          |      |
| G7ANBS-cDNA2                             | CAGCTCCTCCAGGACCATTGTTGGGTGATCAGTGCTTCGTTGGGCGCCATGAGAGCCCTT  | 993  |
| TRIAE_CS42_4AL_TGACv1_288580_AA0952690.1 | CATCTCCTCCAGGGCCATTGTTGGGTGATCAGTGCTTCCTTGGGCGCCATGAGAGCTCTT  | 999  |
| TRIAE_CS42_7DS_TGACv1_622487_AA2040690.1 | CATCTCCTCCAGGGCCATTGTTGGGTGATCAGTGCTTCCTTGGGCGCCATGAGAGCTCTT  | 984  |
|                                          | ** ***** ***** ***** ***** **                                 |      |
| G7ANBS-cDNA2                             | GTTGAGAAGCTGGACATGCTGCTGCTAGCTTATTCATCTCTCAGGAATGCTCTCCAAG    | 1053 |
| TRIAE_CS42_4AL_TGACv1_288580_AA0952690.1 | GTTGGGAAGCTGGAGCTGCTGCTAGATGATTTCATCTCTCAGAAATCTTCTCCAAG      | 1059 |
| TRIAE_CS42_7DS_TGACv1_622487_AA2040690.1 | GTTGGGAAGCTGGACATGCTGCTGCTAGATGATTTCATCTCTCAGAAATCTTCTCCAAG   | 1044 |
|                                          | **** ***** ***** * ***** ** * *                               |      |
| G7ANBS-cDNA2                             | AGGGTGAAGGATGGGATGCACCTTCTCAAAGATGACCTGAAGAGATAAGCTCTACCTT    | 1113 |
| TRIAE_CS42_4AL_TGACv1_288580_AA0952690.1 | AGGGTGAAGGATGGGTTGCGCCTCTCAAAGATGATGTGAAGAGCTAAGCTCTACCTT     | 1119 |
| TRIAE_CS42_7DS_TGACv1_622487_AA2040690.1 | AGGGTGAAGGATGGGATGCCTCTCAAAGATGATGTGAAGAGATAAGCTCTACCTT       | 1104 |
|                                          | ***** ***** ** * ***** * ***** *****                          |      |
| G7ANBS-cDNA2                             | GATGAACTTTTAGAGGTTGAGGACCCTCCCCGATGGCCATGTGCTGGATGAATGAGGCA   | 1173 |
| TRIAE_CS42_4AL_TGACv1_288580_AA0952690.1 | GATGAACTGTGAGGTTGATGACCATCCCCAATAGCCATGTGCTGGATGAATGAGGCG     | 1179 |
| TRIAE_CS42_7DS_TGACv1_622487_AA2040690.1 | GATGAACTGTGAGGTTGATGACCATCCCCAATAGCCATGTGCTGGATGAATGAGGTG     | 1164 |
|                                          | ***** * ***** ** * ***** * ***** *****                        |      |
| G7ANBS-cDNA2                             | CGCGAACTGTCTTATGACATGGAGGATTACATTGACAGCTTATTATTATGTGCCACCT    | 1233 |
| TRIAE_CS42_4AL_TGACv1_288580_AA0952690.1 | CGTGATCTGTCTTACGACATGGAGGATTACATTGACAGCCTTTTA---TCTGTGCCACCT  | 1236 |
| TRIAE_CS42_7DS_TGACv1_622487_AA2040690.1 | CGTGACCTGTCTTACGACATGGAGGATTACATTGACAGCCTTTTA---TCTGTGCCACCT  | 1221 |
|                                          | ** * ***** ***** ***** * ** * *****                           |      |
| G7ANBS-cDNA2                             | GACCATTTCAACAAAAAAGAAGAGGAAGAAGATAAAAAAGAAGATAATAAAGAAGAGG    | 1293 |
| TRIAE_CS42_4AL_TGACv1_288580_AA0952690.1 | GACCATTTCAACAAAAACAAGAAGAAGAAAAACAAGAAGATGATGACCATAAAGAAGAGG  | 1296 |
| TRIAE_CS42_7DS_TGACv1_622487_AA2040690.1 | GACCATTTCAACAAAAACAAGAAGAAGAAAAACAAGAAGATGATGACCATAAAGAAGAGG  | 1281 |
|                                          | ***** ***** ***** ** * * * * * * * *****                      |      |
| G7ANBS-cDNA2                             | CTCAAGTGGCACAGACATCACATACATTGCGCAAGTGTGAGAACATGGTGTGAGGACC    | 1353 |
| TRIAE_CS42_4AL_TGACv1_288580_AA0952690.1 | CTCAAAATGGTACAAACAGATCACATACGTCACGCAAGTGTGAGAACATGGTGTGAGGACC | 1356 |
| TRIAE_CS42_7DS_TGACv1_622487_AA2040690.1 | CTCAAAATGGTACAAACAGATCACATACGTCATGCAAGTGTGAGAACATGGTGTGAGGACC | 1341 |
|                                          | ***** ** * ***** * ***** *****                                |      |
| G7ANBS-cDNA2                             | AGCAAACGCGATTATGTTACTGTTGTCCTCCTCTTCCAAAAAGTCCAAGATTGCGGAA    | 1413 |
| TRIAE_CS42_4AL_TGACv1_288580_AA0952690.1 | AGCAAACGCGTTATGTTAGTGTGTCCTCGTCTTCCAAAGAAGCCCAAGATTGCGGAA     | 1416 |
| TRIAE_CS42_7DS_TGACv1_622487_AA2040690.1 | AGCAAACGCGTTATGTTAGTGTGTCCTCGTCTTCCAAAGAAGCCCAAGATTGCGGAA     | 1401 |
|                                          | ***** ***** ***** ***** ** *****                              |      |

|                                          |                                                               |      |
|------------------------------------------|---------------------------------------------------------------|------|
| G7ANBS-cDNA2                             | ACAATATCAGAATTCAGGATCTATGTCCAGGAGGCAATTGAACGGCATGAC-----      | 1464 |
| TRIAE_CS42_4AL_TGACv1_288580_AA0952690.1 | ACAATTCAGATTCAGGATCTATGTCCAGGAGGCCATTGAACGGTACGATAGATATATG    | 1476 |
| TRIAE_CS42_7DS_TGACv1_622487_AA2040690.1 | ACAATTCAGATTCAGGATCTATGTCCAGGAGGCTATTGAACGGTATGACAGATATAAT    | 1461 |
|                                          | ***** **                                                      |      |
| G7ANBS-cDNA2                             | -----                                                         | 1464 |
| TRIAE_CS42_4AL_TGACv1_288580_AA0952690.1 | CTCCATTGTTGCAGCAACTTGAGGAGACGTACATCTTGTCCACTGGCCATATGCTTCCA   | 1536 |
| TRIAE_CS42_7DS_TGACv1_622487_AA2040690.1 | CTCCATTGTTGCAGCAACTTGAGGAGACGTACATCTTGTCCACTGGCCATATGCTTCCA   | 1521 |
| G7ANBS-cDNA2                             | -----                                                         | 1464 |
| TRIAE_CS42_4AL_TGACv1_288580_AA0952690.1 | ATGCACTATGAAGAAACCAATGATCATGTTGTAATTGATGGCCGGATGAATGAGTTTATC  | 1596 |
| TRIAE_CS42_7DS_TGACv1_622487_AA2040690.1 | ATGCACTATGAAGAAACCAATGATCAGCTTGTAAATTGATGGCCGGATGAATGAGTTTATC | 1581 |
| G7ANBS-cDNA2                             | -----                                                         | 1464 |
| TRIAE_CS42_4AL_TGACv1_288580_AA0952690.1 | GACTCACTGGTGGCTGATATTGTGGCAGATCAGCAGCAGCTCAAGTGGTATCTGTCCCTT  | 1656 |
| TRIAE_CS42_7DS_TGACv1_622487_AA2040690.1 | GACTCACTGGTGG-----CAGATCAGCAGCAGCTCAAGTGGTATCTGTCCCTT         | 1629 |
| G7ANBS-cDNA2                             | -----                                                         | 1464 |
| TRIAE_CS42_4AL_TGACv1_288580_AA0952690.1 | GGATCTGGATGTCTGGGTAATACTACACTTGCCAAAGTGTGTACAACAGAATTGGGATA   | 1716 |
| TRIAE_CS42_7DS_TGACv1_622487_AA2040690.1 | GGATTTGGATGTCTGGGTAATACTACACTTGCCAAAGTGTGTACAACAGAATTGGGATG   | 1689 |
| G7ANBS-cDNA2                             | -----                                                         | 1464 |
| TRIAE_CS42_4AL_TGACv1_288580_AA0952690.1 | CAATTTGATTGCAGAGCTTTCATTCGGATGCCAAAAGCCGGATATGCAGATACTTTTC    | 1776 |
| TRIAE_CS42_7DS_TGACv1_622487_AA2040690.1 | CAATTTGATTGCAGAGCTTTCATTCGAGTGTCCAAAAGCCGGATATGCAGATACTTTTC   | 1749 |
| G7ANBS-cDNA2                             | -----                                                         | 1464 |
| TRIAE_CS42_4AL_TGACv1_288580_AA0952690.1 | TGCGACTTGTCTCACAACCCACCAGAAAAGCGGCCACTACATGCCAATTCTAATGAG     | 1836 |
| TRIAE_CS42_7DS_TGACv1_622487_AA2040690.1 | TGCGACTTGTCTCACAACCCACCAGAAAAGCGGCCAATACATGCCAATTCTAATGAG     | 1809 |
| G7ANBS-cDNA2                             | -----AGGTCTAATAGTC                                            | 1477 |
| TRIAE_CS42_4AL_TGACv1_288580_AA0952690.1 | CTTGGCATCAGCGACATTAATATCAGAAAACATCTGCAAGATAAAAGGTATCTAATGT    | 1896 |
| TRIAE_CS42_7DS_TGACv1_622487_AA2040690.1 | CTTGGCATCAGCGACATTAATATCAGAAAACATCTGCAAGATAAAAGGTACCTAATTAT   | 1869 |
|                                          | ***** *                                                       |      |
| G7ANBS-cDNA2                             | ATTGATGACTTGTGGGATGCATCAGCATGGGATATTATAAATGTGCTTTTCCGAAGGGA   | 1537 |
| TRIAE_CS42_4AL_TGACv1_288580_AA0952690.1 | ATTGATGATTGTGGGACGCATCAGCATGGGATATTATCAAGTATGCCTTTCCAAATGGA   | 1956 |
| TRIAE_CS42_7DS_TGACv1_622487_AA2040690.1 | ATTGATGATTGTGGGACGCATCAGCATGGGATATTATCAAAATGCTTTTCCAAATGGA    | 1929 |
|                                          | ***** ** * ** * ** * ** *                                     |      |

|                                          |                                                               |      |
|------------------------------------------|---------------------------------------------------------------|------|
| G7ANBS-cDNA2                             | AGCCATGGCAGTAGAATAATAAACCACACAGATTGAAGATGTTGCATTAACATGTTGC    | 1597 |
| TRIAE_CS42_4AL_TGACv1_288580_AA0952690.1 | AACCGTGGCAGCAGAATAATAAATAACTACACAGATTGAAGATGTTGCATTAACATGTTGC | 2016 |
| TRIAE_CS42_7DS_TGACv1_622487_AA2040690.1 | AACCGTGGCAGCAGAATAATAAATAACTACACAGATTGAAGATGTTGCATTAACATGTTGC | 1989 |
|                                          | * * * * *                                                     |      |
| G7ANBS-cDNA2                             | TGTGATCACTGGGAGCATGTTTTCGAGATGAAACCTCTTGACGACGATCACTCAAGAAAG  | 1657 |
| TRIAE_CS42_4AL_TGACv1_288580_AA0952690.1 | TCTGATCACTCAGAACATGTTTTCGAGATGAAACCTCTTGACGAGATCACTCAAGAAAG   | 2076 |
| TRIAE_CS42_7DS_TGACv1_622487_AA2040690.1 | TGTGATCACTCAGAACATGTTTTCATGATGAAACCTCTTGATGACGATCACTCAAGAAAG  | 2049 |
|                                          | * * * * *                                                     |      |
| G7ANBS-cDNA2                             | CTATTCTTTAACAGACTTTTTGGTCTGAAAGTGACTGTCCTGAAGAATTCAAACAAGTT   | 1717 |
| TRIAE_CS42_4AL_TGACv1_288580_AA0952690.1 | CTATTCTTTAACAGGCTTTTTGGTCTGGAAGTGACTGTCCTGAAGAATTTAAACAAGTT   | 2136 |
| TRIAE_CS42_7DS_TGACv1_622487_AA2040690.1 | CTGTTCTTTAACAGACTTTTTGGTCTGGAAGTGACTGCCCTGAAGAATTTAAACAAGTT   | 2109 |
|                                          | * * * * *                                                     |      |
| G7ANBS-cDNA2                             | TCAAATGAAATTGTTGATATATGTGGTGGTTGCCGCTAGCAACAATCAATATAGCTAGT   | 1777 |
| TRIAE_CS42_4AL_TGACv1_288580_AA0952690.1 | TCAAATGAAATTGTTGATATATGTGGTGGTTGCCGCTAGCTACGATCAACATAGCTACT   | 2196 |
| TRIAE_CS42_7DS_TGACv1_622487_AA2040690.1 | TCAAATGAAATTGTTGATATATGTGGTGGTTGCCGCTAGCTATGATCAACATAGCTAGT   | 2169 |
|                                          | * * * * *                                                     |      |
| G7ANBS-cDNA2                             | CATTTGGCAAACCAACAGCAGGATTAGCACTTGATTGCTGGCATAACATGTTGATTCA    | 1837 |
| TRIAE_CS42_4AL_TGACv1_288580_AA0952690.1 | CATTTGGCAAATCAACAGAAAGCAGTATCACTGGATTCTTGACATACATACGTGATTCCG  | 2256 |
| TRIAE_CS42_7DS_TGACv1_622487_AA2040690.1 | CATTTGGCAAATCAACAGCAGCAGTATCACTGGATTCTTGACATACATACGTGATTCCG   | 2229 |
|                                          | * * * * *                                                     |      |
| G7ANBS-cDNA2                             | CTGAGGTCCCATTCTTGGTCAAGTTCTACCTTGGAAAGAACGAGAAAAGTACTGAACTTT  | 1897 |
| TRIAE_CS42_4AL_TGACv1_288580_AA0952690.1 | TTGAGGTCAACATCGTGGTCAAGTTCTGCTTCGAAAGAACAAGACAAGTACTGAACTTC   | 2316 |
| TRIAE_CS42_7DS_TGACv1_622487_AA2040690.1 | TTGAGGTCAACATCGTGGTCAAGTTCTACTTCGAAAGAACAAGACAAGTACTGAACTTC   | 2289 |
|                                          | * * * * *                                                     |      |
| G7ANBS-cDNA2                             | AGCTACAATAATCTTCTCAGCATCTGAAGACATGTTGCTGTATTTTCATATGTATCCA    | 1957 |
| TRIAE_CS42_4AL_TGACv1_288580_AA0952690.1 | AGCTACAATGATCTTCTCATCATCTGAAGACATGTTGTTGTATCTTCATATGTATCCA    | 2376 |
| TRIAE_CS42_7DS_TGACv1_622487_AA2040690.1 | AGCTACAATAATCTTCTCATCATCTGAAGACATGTTGTTGTATCTTCATATGTATCCA    | 2349 |
|                                          | * * * * *                                                     |      |
| G7ANBS-cDNA2                             | GAGGGCTCCAATCTGGAAGGATGATCTGGTGAAGCAATGGGTGGCTGAAGGGTTGTT     | 2017 |
| TRIAE_CS42_4AL_TGACv1_288580_AA0952690.1 | GAGGGCTCCATAGTCTGGAAGGATGATCTGGTGAAGCAATGGGTGGCTGAAGCCCTTCATC | 2436 |
| TRIAE_CS42_7DS_TGACv1_622487_AA2040690.1 | GAGGGCTCCATAGTCTGGAAGGATGATCTGGTGAAGCAATGGGTGGCTGAAGCCCTTCATC | 2409 |
|                                          | * * * * *                                                     |      |
| G7ANBS-cDNA2                             | GCTACAGGAAAAGGAAAGAGCAAGATAAAGAAACGACAGAAAACGACGGAATCTAT      | 2077 |
| TRIAE_CS42_4AL_TGACv1_288580_AA0952690.1 | AATACAGGAAAAGGAAAGAAAGATCAAACTGGATGGAGAAAGCTGCAGGAATCTAT      | 2496 |
| TRIAE_CS42_7DS_TGACv1_622487_AA2040690.1 | AATACAGGAAAAGGAAAGAAAGATCAAACTGGATGGAGAAAGCTGCAGGAATCTAT      | 2469 |

```

*** ***** ** * ** ***** *****

G7ANBS-cDNA2      TTTGATGCGCTTGTGATAGAAGATTCAATCAACCTTTATATCAACTACAACAATAAG      2137
TRIAE_CS42_4AL_TGACv1_288580_AA0952690.1  TTCGATGAACCTTGTGATAGAAGATTCATCCAACCCCTAAATATCAACTACAACAATAAG      2556
TRIAE_CS42_7DS_TGACv1_622487_AA2040690.1  TTCGATGAACCTTGTGATAGAAGATTCATCCAACCTCTAAATATCAACTACAACAATAAG      2529
** ** * ** ***** ** * ** *****

G7ANBS-cDNA2      GTGTTGTCCTGTACAGTTCATGACGTAGTACGTGATCTTATTGCAAAAAGTCTGCAGAA      2197
TRIAE_CS42_4AL_TGACv1_288580_AA0952690.1  GTGTTGTCATGTACTGTTTCATGAAGTGGTACGTGATCTTCTTGCACACAAGTCTG-----      2611
TRIAE_CS42_7DS_TGACv1_622487_AA2040690.1  GTGTTGTCCTGTACTGTTTCATGAAGTGGTACGTGATCTTCTTGCACACAAGTCTGCAGAA      2589
***** ** * ** ***** ** * ** *****

G7ANBS-cDNA2      GAGAATTCATTGGTAGTAGACTACAATTGAAAAATATAGCACTTCCCATAAGGTT      2257
TRIAE_CS42_4AL_TGACv1_288580_AA0952690.1  -----TGGTAGTAGATTATAATCGAAAGAATATACACTTCTCATAAGGCC      2658
TRIAE_CS42_7DS_TGACv1_622487_AA2040690.1  GAGAATTCATTGGTAGTAGATTATAATCGAAAGAATATACACTTCTCATAAGGCC      2649
***** ** * ** ***** ** * ** *****

G7ANBS-cDNA2      CGTCGCTATCTCTCATCTTTGGTGATGCAAAATATGCCAAGACACCAGAAAACATCACA      2317
TRIAE_CS42_4AL_TGACv1_288580_AA0952690.1  CGTCGGCTATCTCTCTCTTTGCCAATGCAAGTTATGCCAAGACACCTGTAACATCACA      2718
TRIAE_CS42_7DS_TGACv1_622487_AA2040690.1  CGTCGGCTATCTCTCTCTTTGCCACTGAAGGTATGCCAAGACACCAGTAAACATCACA      2709
***** ***** ** * ** ***** ** * ** *****

G7A-RTR
G7ANBS-cDNA2      AGGTCACAAGTTCGGTCACTCAGATTTTTGGATTATTCAAGTGATGCCTTGTGTTAGA      2377
TRIAE_CS42_4AL_TGACv1_288580_AA0952690.1  AAGCGCAGGTCGGTCACTTAATTTGTTGGATTGTCGAGTGCATGCCTTGTATTGGA      2778
TRIAE_CS42_7DS_TGACv1_622487_AA2040690.1  AAGCCGCAAGTTCGGTCACTTAATTTGTTGGATTGTCGAGTGCATGCCTTGTATTGGA      2769
* * * ** ***** * ** ***** ** * ** ***** ** * **

G7ANBS-cDNA2      GACTTCAAGGTTCTCCGTGCTCAAACCTTCAACTATCTGGTCATTGTGGGCCCATGAC      2437
TRIAE_CS42_4AL_TGACv1_288580_AA0952690.1  GAGTTC AAGGTTCTCCGTGTTCTGAACCTTCAACTATCCGGTCATTGTGGGCCCATGAC      2838
TRIAE_CS42_7DS_TGACv1_622487_AA2040690.1  GAGTTC AAGGTTCTCCGTGTTCTGAACCTTCAACTATCCGGTCATTGTGGGCCCATGAC      2829
** ***** ** * ** ***** ** * ** *****

G7ANBS-cDNA2      CCCATAGACCTCACTGGCATTTCAGAGCTGTTTCAGTTAAGATATTTGAAGATACAAGT      2497
TRIAE_CS42_4AL_TGACv1_288580_AA0952690.1  CCCATAGACCTCACTGGGATTCAGAAGCTGTTTCAGTTGAGATATTTGAAGATTACAAGT      2898
TRIAE_CS42_7DS_TGACv1_622487_AA2040690.1  CCCATAGACCTCACTGGGATTCAGAAGCTGTTTCAGTTGAGATATTTGAAGATTACAAGT      2889
***** ***** ** * ** ***** ** * ** *****

G7ANBS-cDNA2      GATATCGCATAAACTACCAAACAGTATACGAGGGCTGCAATGTTGAAAACGCTCGAT      2557
TRIAE_CS42_4AL_TGACv1_288580_AA0952690.1  GATGTGTGCATAAACTACCAAACAAATGCGAAAGCTGCAATGTTGAAAACGCTGGAT      2958
TRIAE_CS42_7DS_TGACv1_622487_AA2040690.1  GATGTGTGCATAAACTACCAAACAAATGCGAAAGCTGCAATGTTGAAAACGCTGGAT      2949
*** * ***** ** * ** ***** ** * ** *****

G7ANBS-cDNA2      CTTATGGATGCAACAAGAGTCACTGCTGTTCCATGGGATATTATACATCTCCCACACTTG      2617
TRIAE_CS42_4AL_TGACv1_288580_AA0952690.1  ATTATAGATGCCAACAGAGTCACTGCTATCCGTGGGATATTATATCTCCCACACTTG      3018

```

|                                          |                                                               |      |
|------------------------------------------|---------------------------------------------------------------|------|
| TRIAE_CS42_7DS_TGACv1_622487_AA2040690.1 | ATTATAGATGCACCAAGAGTCACTGCTATCCCATGGGATATTATATATCTCCCACTTG    | 3009 |
|                                          | **** * * * * *                                                |      |
| G7ANBS-cDNA2                             | TTGCACCTGACTCTCCGGTTGACACAAATCTGCTGGATTGGATAGGCAGCATGACTGAC   | 2677 |
| TRIAE_CS42_4AL_TGACv1_288580_AA0952690.1 | TTGCACCTGACGCTTCTGTTGACACAAATCTGCTGGATTGGATTGGCAGCATGACTGGC   | 3078 |
| TRIAE_CS42_7DS_TGACv1_622487_AA2040690.1 | TTGCACCTAACCCCTCTCTGTTGACACAAATCTGCTGGATTGGATTGGCAGCATGACTGAC | 3069 |
|                                          | ***** * * * * *                                               |      |
| G7ANBS-cDNA2                             | TCAGTCATCAGTCTGTGGACCTTGGCAAGCTGAACTACCTGCAGGATCTTCATCTTAAC   | 2737 |
| TRIAE_CS42_4AL_TGACv1_288580_AA0952690.1 | TCCATCATCAGTCTGTGGACCTTGGCAACCTGAACTACCTGCAAGATCTTTATCTTACC   | 3138 |
| TRIAE_CS42_7DS_TGACv1_622487_AA2040690.1 | TCCATCATCAGTCTGTGGACCTTGGCAACCTGAACTACCTGCAAGATCTTTATCTTACC   | 3129 |
|                                          | ** * * * * *                                                  |      |
| G7ANBS-cDNA2                             | ATGTCGTGTTCTTCTAC-----TTCTGGGCGTGAAGCTCTGGCTCATTG             | 2785 |
| TRIAE_CS42_4AL_TGACv1_288580_AA0952690.1 | ATTTCTTCTACACATCTTCTGGCCATCCAGAGAAAAACATGGAAGCTCTGGGTCTTTA    | 3198 |
| TRIAE_CS42_7DS_TGACv1_622487_AA2040690.1 | ATTTCTTCTACACATCTTCTGGCCATCCAGAGAAAAACATGGAAGCTCTGGGTCTTTA    | 3189 |
|                                          | ** * * * * *                                                  |      |
| G7ANBS-cDNA2                             | ATCGGAGGACATGGTAACCTGAAAATATAGTAATGTCTCATGGCTCATCG-----       | 2836 |
| TRIAE_CS42_4AL_TGACv1_288580_AA0952690.1 | CTAGGAGGACATGGCAACCTGAAAATATAGTAGTGTCTCATGGCCATTGGTTAAAGAT    | 3258 |
| TRIAE_CS42_7DS_TGACv1_622487_AA2040690.1 | CTAGGAGGACATGGCAACCTGAAAATATAGTAGTGTCTCATGGCCATCGGTTAAAGAT    | 3249 |
|                                          | * * * * *                                                     |      |
| G7ANBS-cDNA2                             | ---GTGATTCCTGGCGCTCAAAGCAATAATTTCTGGGATGACTTGAACCTCTCCCC      | 2893 |
| TRIAE_CS42_4AL_TGACv1_288580_AA0952690.1 | ATTGTGGTTCCTGGTGCCTCAAAGTAATCATTTCCTGGGATGAGTTGAACTCTCCCA     | 3318 |
| TRIAE_CS42_7DS_TGACv1_622487_AA2040690.1 | ATTGTGGTTCCTGGTGCCTCAAAGTAATCATTTCCTGGGATGAGTTGAACTCTCCCA     | 3309 |
|                                          | ** * * * * *                                                  |      |
| G7ANBS-cDNA2                             | CTTCTCCAGAGATTGAATGCTCGCCGACAGCTGCATCATTTCCTCCGAATTCCTAAG     | 2953 |
| TRIAE_CS42_4AL_TGACv1_288580_AA0952690.1 | CTTCTCCAGAGATTGAATGCTCGCCGACAGCTGCATCATTTCCTCCGAATTCCTAAG     | 3378 |
| TRIAE_CS42_7DS_TGACv1_622487_AA2040690.1 | CTTCTCCAGAGATTGAATGCTCACCGCAGCTGCATCATTTCCTCCGAATTCCTAAG      | 3369 |
|                                          | ***** * * * * *                                               |      |
| G7ANBS-cDNA2                             | TGGATTAAGAAGTTCACCTGTGCATTCTGAAGATTGCAGTGGTGAAGTGCAGATT       | 3013 |
| TRIAE_CS42_4AL_TGACv1_288580_AA0952690.1 | TGGATTAAGAAATGGTAACCTGTGCATTCTGAAGATTGCAGTGGTGAAGTGCAGATG     | 3438 |
| TRIAE_CS42_7DS_TGACv1_622487_AA2040690.1 | TGGGTTAAAAAAGTGGTAACCTGTGCATTCTGAAGATTGCAGTGGTGAAGTGCAGATG    | 3429 |
|                                          | ** * * * *                                                    |      |
| G7ANBS-cDNA2                             | AGTTGGTTGATATTCTGAGAGATTGCCTGCCCTCACTGCTCTGTCTGTATGTGCGG      | 3073 |
| TRIAE_CS42_4AL_TGACv1_288580_AA0952690.1 | AGTTGTGTGATATTCTCAGAGATTGCCTGCCCTCACTGCTCTGTCTGTATGTGCGG      | 3498 |
| TRIAE_CS42_7DS_TGACv1_622487_AA2040690.1 | AGTTGTGTGATATTCTCAGAGATTGCCTGCCCTACTGCTCTGTCTGTATGTGCGG       | 3489 |
|                                          | ***** * * * * *                                               |      |
|                                          | G7-Olig                                                       |      |
| G7ANBS-cDNA2                             | CGTGCGCCATTGAAAGATCACTTCAACAAGGAGCGGTTCTCAGTTCTCAAGTAC        | 3133 |





|                                          |                                                                |      |
|------------------------------------------|----------------------------------------------------------------|------|
| G7ANBS-cDNA2                             | TCGCCGGATGCTTCGCCTTCCTTGTGACATGCACATCGTCGTCGCCGACGCGCCGAC      | 3652 |
| TRIAE_CS42_4AL_TGACv1_288580_AA0952690.1 | TCTCCAGAAGACTTCACCTTCCTGT-----CGAC                             | 4068 |
| TRIAE_CS42_7DS_TGACv1_622487_AA2040690.1 | CCTCCAGAAGACTTCACCTTCCTGT-----CGAC                             | 4059 |
|                                          | * * * * * ***** *                                              | **** |
| G7ANBS-cDNA2                             | CTGCCGTGACCTTCCCATGCTCTGCGCAGGAAGTCCCTTCCTGCATGATTCTTCATG      | 3712 |
| TRIAE_CS42_4AL_TGACv1_288580_AA0952690.1 | ATGCGTGCGTACCGTCCATGCTCTCCGTCCAGAGTCCCTTCCTGGATGCCGTCTTCGCG    | 4128 |
| TRIAE_CS42_7DS_TGACv1_622487_AA2040690.1 | ATGCGTGCGTACCGTCCGTCTCCGTCCGAGTCCCTTCCTTGATGCCATCTTCGCG        | 4119 |
|                                          | *** * * * * * * ***** * * ***** * * * * * * * *                |      |
| G7ANBS-cDNA2                             | CGCCGTGCCGTGCCGTGAGGGCAACNNGGCGGACCTCCGGAGCTTCTGGGTGAGA        | 3772 |
| TRIAE_CS42_4AL_TGACv1_288580_AA0952690.1 | CGTCGTGCCGTGAAGGGAGGA--CGACCCGCTGGACCTCCGGAGCTTCTGGGTGAGG      | 4186 |
| TRIAE_CS42_7DS_TGACv1_622487_AA2040690.1 | CGTCGTGCCGTGAAGGGAGGG--CAACCCGCTGGACCTCCGGAGCTTCTGGGTGAGG      | 4177 |
|                                          | ** ***** * ***** ** ***** *****                                |      |
| G7ANBS-cDNA2                             | AGATGGAGGTCGGGTACGAGTCATTGCAGCTGGTGTGCTCGAGTACCTGTACACCGGCTGCG | 3832 |
| TRIAE_CS42_4AL_TGACv1_288580_AA0952690.1 | AGGTGGAGGTCGGGTATGAGGCACTGCAGTTGGTGTGCTCGAGTACCTGTACACCGCGCA   | 4246 |
| TRIAE_CS42_7DS_TGACv1_622487_AA2040690.1 | AGGTGGAGGTCGGGTATGAGGCACTGCAGTTGGTGTGCTCGAGTACCTGTACACCGGCTGCA | 4237 |
|                                          | ** ***** * * * * * ***** *****                                 |      |
| G7ANBS-cDNA2                             | TCGGCGACTTCCCAAGTCGGTGTGCGTCTGCGTGATGTAGATGGCTGCACGCATGTCG     | 3892 |
| TRIAE_CS42_4AL_TGACv1_288580_AA0952690.1 | TCCGCGACTTCCCAAGTCAGATGCGTTTGGCGCAGTGGACGGCTGCGCCACGTCG        | 4306 |
| TRIAE_CS42_7DS_TGACv1_622487_AA2040690.1 | TCCGCGACTTCCCAAGTCGGCATGCGTTTGGCGCAGACGTTGGACGGCTGCGCCATGTCG   | 4297 |
|                                          | ** ***** * * * * * ***** * * * * * ***** * * * * *             |      |
| G7ANBS-cDNA2                             | GCTGCCACCCGTCATCTCCTTCATGGTGCAGTCTCTTTGCCGATCCACCTCCAGA        | 3952 |
| TRIAE_CS42_4AL_TGACv1_288580_AA0952690.1 | GTTGCCTTCCCGCATCTCCTTCATGGCGCAGTTCATTTGCCGATCCATCTTCGAGG       | 4366 |
| TRIAE_CS42_7DS_TGACv1_622487_AA2040690.1 | GCTGCCTCCCGCATCTCCTTCATGGCGCAGTTCATTTGCCGATCCATCTTCAGG         | 4357 |
|                                          | * * * * * * * * * * * * * * * * * * * * * * * * * * * * * *    |      |
| G7ANBS-cDNA2                             | TTGCCAAGCTCACCAACTCTCCAGGGGTTGCTTAAAAATTTGCTTTTTCAGATTTT       | 4012 |
| TRIAE_CS42_4AL_TGACv1_288580_AA0952690.1 | TTGCGGTGCTCACCAAC-----                                         | 4383 |
| TRIAE_CS42_7DS_TGACv1_622487_AA2040690.1 | TTGCGGTGCTCACCAAC-----                                         | 4374 |
|                                          | **** *****                                                     |      |
| G7ANBS-cDNA2                             | ATTTAGTATTTTGTTTTGAAGTTCTGACTTGTGTATCTATGATGTGATAAATTCGT       | 4072 |
| TRIAE_CS42_4AL_TGACv1_288580_AA0952690.1 | -----                                                          | 4383 |
| TRIAE_CS42_7DS_TGACv1_622487_AA2040690.1 | -----                                                          | 4374 |
| G7ANBS-cDNA2                             | GTCGGTGTACTTGAACATTTTACTATCATAGTGTGTTGCGTTTTTAAATAGCCAAT       | 4132 |
| TRIAE_CS42_4AL_TGACv1_288580_AA0952690.1 | -----                                                          | 4383 |
| TRIAE_CS42_7DS_TGACv1_622487_AA2040690.1 | -----                                                          | 4374 |

|                                          |                                                                         |      |
|------------------------------------------|-------------------------------------------------------------------------|------|
| G7ANBS-cDNA2                             | ACTAAGCCACGTCTTTCCATGCAGTGGCGTCTCCTTGATGTCCTTGATGATGTTGAAGT             | 4192 |
| TRIAE_CS42_4AL_TGACv1_288580_AA0952690.1 | -----CACTTCCAGCGGCTTCTCCTTGATGTCCTTGATGATGTTGAAGT                       | 4427 |
| TRIAE_CS42_7DS_TGACv1_622487_AA2040690.1 | -----CACTTCCAGCGGCTTCTCCTTGATGTCCTTGATGATGTTGAAGT                       | 4418 |
|                                          | * * ** * ** *****                                                       |      |
| G7ANBS-cDNA2                             | TGATAACCTTCCATTGATCTTATCTGTTGCAAACCTATGCAATAAATCATGCATGAACT             | 4252 |
| TRIAE_CS42_4AL_TGACv1_288580_AA0952690.1 | GGATAACCTTCCATTGATCTTATCTGTTGCAAACCTATGCAATAAATCTTGATGCATCT             | 4487 |
| TRIAE_CS42_7DS_TGACv1_622487_AA2040690.1 | GGATAACCTTCCATTGATCTTATCTGTTGCAAACCTATGCAATAAATCTTGATGCATCT             | 4478 |
|                                          | ***** * **                                                              |      |
| G7ANBS-cDNA2                             | TCTCGAGAGATGCCTTGAGATGGTAGTTCGGTCAAATCTTGACATGATTACTCTTGAGAA            | 4312 |
| TRIAE_CS42_4AL_TGACv1_288580_AA0952690.1 | GCTTGAGAGATGCCTTGAGATGGTAGTCCGGTCAAATCTTGACATGATTACTCTTGAGAA            | 4547 |
| TRIAE_CS42_7DS_TGACv1_622487_AA2040690.1 | GCTCGAGAGATGCCTTGAGATGGTAGTCCGGTCAAATCTTGACATGATTACTCTTGAGAA            | 4538 |
|                                          | ** *****                                                                |      |
| G7ANBS-cDNA2                             | AGCATTGCCTCCAGATATTATCAAGCAAATGCTGATTACGCCTAAGTCTTGGGTTAGT              | 4372 |
| TRIAE_CS42_4AL_TGACv1_288580_AA0952690.1 | AGCATTGCCTCCAGATATTATCAAGCAAATGCTGATTACGCCTAAGTCTTGGGTTAAT              | 4607 |
| TRIAE_CS42_7DS_TGACv1_622487_AA2040690.1 | AGCATTGCCTCCAGATATTATCAAGCAAATGCTGATTACGCCTAAGTCTTGGACTAGT              | 4598 |
|                                          | ***** * ** * ** * ** * ** * ** * ** * ** * ** * ** * ** * ** * **       |      |
| G7ANBS-cDNA2                             | TTCACCGAAGACAAGGATTTCCTAACAAACATGTAAGAAGGATACTCCAAGCTTTGA               | 4432 |
| TRIAE_CS42_4AL_TGACv1_288580_AA0952690.1 | TTCACCAAGGACAACGGATTTCCTAACAAACATGTAAGAAGGATATTCGGAGCTCTCGA             | 4667 |
| TRIAE_CS42_7DS_TGACv1_622487_AA2040690.1 | TTCACCGAAGATAAGGATTTCCTAACAAACATGTAAGAAGGATACTCAGAGCTTTGA               | 4658 |
|                                          | *** ** * ** * ** ***** ** *****                                         |      |
| G7ANBS-cDNA2                             | CAGTAATGATGCGGAGGTAGCGAGATCCTGCACCAGGAAGGCAGACTAATCTTGATGA              | 4492 |
| TRIAE_CS42_4AL_TGACv1_288580_AA0952690.1 | TTCTTATGATGCGGAGGTAGTGAGTTGCTACTCTACGAAGGCAGACTAATCTTGATGA              | 4727 |
| TRIAE_CS42_7DS_TGACv1_622487_AA2040690.1 | TTCTGATGATGTGTTAGTGAGGATGCTGCTCAAAGAAGGCAGACTAATCTTGATGG                | 4718 |
|                                          | * ***** * ** * ** * ** * ** * ** * ** * ** * ** * ** * ** * ** * **     |      |
| G7ANBS-cDNA2                             | TGCGTTGCGTGCACATGCTGTTGAACATTGTGACTCAAAGATCATAACAGAAATTTT               | 4552 |
| TRIAE_CS42_4AL_TGACv1_288580_AA0952690.1 | TGCATTTGCATTGCACATGCTGTAGAACATTGTGACCCAAAGATCACAACAGAATTCT              | 4787 |
| TRIAE_CS42_7DS_TGACv1_622487_AA2040690.1 | TGCATTTGCATTGCACATGCTGTAGAACATTGTGACTCGAAGTCAATGGAATTCT                 | 4778 |
|                                          | *** ***** ***** ***** ***** * ** * ** * ** * ** * ** * ** * **          |      |
| G7ANBS-cDNA2                             | GGACATCACACTGCAGATGTTAATCATAGAAATCCTAGAGTTATACTGTTCTTCACAT              | 4612 |
| TRIAE_CS42_4AL_TGACv1_288580_AA0952690.1 | GGACCTCGAACTGCAGATGTTAATCGTAGAAATCAAAGAGTTATACTGTTCTTCACAT              | 4847 |
| TRIAE_CS42_7DS_TGACv1_622487_AA2040690.1 | GGATATCGGACTGCAGATGTTAATCATAGAAATCAAAGAGTTATACTGTTCTTCACGT              | 4838 |
|                                          | *** ** ***** ***** ***** ***** ***** * ** * ** * ** * ** * ** * ** * ** |      |
| G7ANBS-cDNA2                             | TGCTGCCAGGCGAAGAGATCCCAAATCTTGCTCTCTTTAACCAAGGGTGCCTGGCC                | 4672 |
| TRIAE_CS42_4AL_TGACv1_288580_AA0952690.1 | TGCTGCCAGGCGAAGAAATCTTAAATCTTGCTCTCTTTAACCAAGGAGCTCGGCC                 | 4907 |
| TRIAE_CS42_7DS_TGACv1_622487_AA2040690.1 | TGCTGCCAGGCGAAGAGATCTTAAATCTTGCTCTCTTTAACCAAGGTGCCTGGCA                 | 4898 |

```

***** **
G7ANBS-cDNA2          TTCCGATCTTACATTTGATGGAAGAAGCAGTTCAAATCTCAAAAGACTCACAAAACA 4732
TRIAE_CS42_4AL_TGACv1_288580_AA0952690.1  TTCCGATCTTACATTTGATGGAAGAAAAGCAATACAAATCTCAAAGAGACTCACAAAACA 4967
TRIAE_CS42_7DS_TGACv1_622487_AA2040690.1  TTCTGATCTTACATTTGATGGAAGAAAAGCAGTTCAAATCTCAAAGAGACTCACAAAACA 4958
***** **

G7ANBS-cDNA2          TAGGGATTACTTTGGGGTTACTGAAAAAGGAAATCGTCTCCTCAAGATCGGTTATGCAT 4792
TRIAE_CS42_4AL_TGACv1_288580_AA0952690.1  TGGGGATTACTTTGGGGTTACTGAAAGAGGAAAACCGTCTCTGAATATAGTTTATGCAT 5027
TRIAE_CS42_7DS_TGACv1_622487_AA2040690.1  TGGGGATTACTTTGGGGTTACTGAAAGAGGAAAACCGTCTCTGAAGATAGGTTATGCAT 5018
***** **

G7ANBS-cDNA2          TGAGATACTAGAGCAAGCTGAAAGAAAAGC---ACAACCTGGAGAAGAATGAGTTTCTGT 4849
TRIAE_CS42_4AL_TGACv1_288580_AA0952690.1  TGAGATACTGGAGCAAGCTGAAAGAGGGGTCACAACCTGGAGAAGCATCGGTTTCTCT 5087
TRIAE_CS42_7DS_TGACv1_622487_AA2040690.1  TAAGATACTGGAGCAAGCTGAAAGAGGGATCCACAACCTGGAGAAGCATCGGTTTCTCT 5078
***** **

G7ANBS-cDNA2          TGAAATGGCCGGTGACGGTCTATGTGAAAGTTGTTGACCTTTGAAAACAGGTTCTT 4909
TRIAE_CS42_4AL_TGACv1_288580_AA0952690.1  TGCAATAGCTGGTGACTGTCAACGTGGGACGCTGTTGCACCT-CGAAAATCGAGTACTT 5146
TRIAE_CS42_7DS_TGACv1_622487_AA2040690.1  TGCAATAGCTGGTGACCGTCAACGTGGAAGCTGTTGACCT-CGAAAATCGAGTGTCT 5137
***** **

G7ANBS-cDNA2          TGATGAAAATACTTTCCGATTGAGGCAACAGTAGCAATGAAAATCCTCAAGTGAATG 4969
TRIAE_CS42_4AL_TGACv1_288580_AA0952690.1  TGATGAGGATAATGTTTCCAACCTGAGGCAAGAGTAGCAATGGACATCGCTCAAGTGGATT 5206
TRIAE_CS42_7DS_TGACv1_622487_AA2040690.1  TGATGAGGATAATGTTTCCAACCTGAGGCAAGAAATAGCAATGGACATCGCTCAAGTGGATT 5197
***** **

G7ANBS-cDNA2          GTACTTTGGAATTTACTTTTGATTCTAGTCCAAATCCACATCTGGAGATACGATGGCCAA 5029
TRIAE_CS42_4AL_TGACv1_288580_AA0952690.1  GCACCTTTGGAGTTAACCTTGATTCTGAGGCAAAACCTCCTTCGGAGAAGAAGTGGCAA 5266
TRIAE_CS42_7DS_TGACv1_622487_AA2040690.1  GTACTTTGAAGTTAACCTTGATTCTGGGGCAAAACCTCCTTCGGAGAAGAAGTGGCAA 5257
***** **

G7ANBS-cDNA2          CCGTTGATCTAAATGAATTTTCTTTCGAAACGAACGATGCACACTTGACTCGGCTGAGAG 5089
TRIAE_CS42_4AL_TGACv1_288580_AA0952690.1  CCATTGATCTAAATGAAACTCGTTTCCAAATGAATGACGAACACTTAGCTCGGATGAGTG 5326
TRIAE_CS42_7DS_TGACv1_622487_AA2040690.1  CCATTGATCTAAATGAAACTCCTTCCATATGAATGAAGAACAACCTTAGCTCGGATGAGTA 5317
***** **

G7ANBS-cDNA2          CCCTCTCCAAAACAGGTCACACTCGGCAACGCTTCTCCCATGTTGTTGGAATGTGCTG 5149
TRIAE_CS42_4AL_TGACv1_288580_AA0952690.1  CCCTCTCAAACAGT-TGAACCTGTAAACGCTTCTTCCGCGTTGTTCAAATGTCATA 5385
TRIAE_CS42_7DS_TGACv1_622487_AA2040690.1  CCCTCTCCAAAACAGT-TGAACCTGTAAACGCTTCTTCCGCGTTGTTCAAATGTGATA 5376
***** **

G7ANBS-cDNA2          AAGAAGATCATGGATGATGAATCTGAGCTGGATTCCATCGGAAGAGACACATCCACCGAG 5209
TRIAE_CS42_4AL_TGACv1_288580_AA0952690.1  GACAAGATTATGAATGATGAACCTGAGCTGGCTTCCCTTCAAAGAGACACATCCACCGAG 5445

```

```
TRIAE_CS42_7DS_TGACv1_622487_AA2040690.1   GACAAGATTATGGATGATGAACCTGAGCTGGCTCCTCTTCAAAGAGACGCATCCACCGAG   5436
* **** * * **** * * * **** * * * **** * * * **** * * * **** * * * **** * * *
G7ANBS-cDNA2                               AGGAAGCGGAGGTTCCATGAGCTGCAGGACTTGCTTCAGAAGGCATTACGCGAGGATAAG   5269
TRIAE_CS42_4AL_TGACv1_288580_AA0952690.1   AGGAATCGGAGGTTCCGTTGACATGCACGACACGCTTCAGAAGGCATTACGCGAGGACAAG   5505
TRIAE_CS42_7DS_TGACv1_622487_AA2040690.1   AGGACTCGGAGGTTCCGTTACCTGCAGGACGCGGTTTCAGAAGGCATTAAGCGAGGACAAG   5496
**** ***** * * **** * * * **** * * * **** * * * **** * * * **** * * *
G7ANBS-cDNA2                               GAGTCGTCTAGTTTGACAAGTCTCAGGTATAGCTCGAATGCCGACGGGTGACATGAAAAG   5329
TRIAE_CS42_4AL_TGACv1_288580_AA0952690.1   GGTTCGTCTAGTTTGACAAATCTGGGTCATAG-----                         5538
TRIAE_CS42_7DS_TGACv1_622487_AA2040690.1   GCTAGTTT-----TGACAAATCTGGGTCATAG-----                         5523
*   *           *   ***
G7ANBS-cDNA2                               CAGCCAGAAATGCATGCTGGGTTATACCGTTATACTAGTACTATATCAGATTGGAGTAC   5389
TRIAE_CS42_4AL_TGACv1_288580_AA0952690.1   -----                         5538
TRIAE_CS42_7DS_TGACv1_622487_AA2040690.1   -----                         5523
G7ANBS-cDNA2                               GACTGGAAAGCAGCCAGATATTCAGATTGTCCTTTTATAAAAAGAAAATTTTCAGGTGAA   5449
TRIAE_CS42_4AL_TGACv1_288580_AA0952690.1   -----                         5538
TRIAE_CS42_7DS_TGACv1_622487_AA2040690.1   -----                         5523
G7ANBS-cDNA2                               ATTAATCTAGAACTCGGTTCTCTCTCGGATCGAACCTTCTACAAACTGCAAGCAGCCGA   5509
TRIAE_CS42_4AL_TGACv1_288580_AA0952690.1   -----                         5538
TRIAE_CS42_7DS_TGACv1_622487_AA2040690.1   -----                         5523
G7ANBS-cDNA2                               TTGTTTGGAACTGCAGTTATCATTTAACGCCAGAACATGTTTCATGGCATGTGCTGTCTT   5569
TRIAE_CS42_4AL_TGACv1_288580_AA0952690.1   -----                         5538
TRIAE_CS42_7DS_TGACv1_622487_AA2040690.1   -----                         5523
G7ANBS-cDNA2                               TTCTCTGTTCTGCACCTTTGAGGTGATGCTGTTGTGTAATTCAGCAACTAGTACAAAT   5629
TRIAE_CS42_4AL_TGACv1_288580_AA0952690.1   -----                         5538
TRIAE_CS42_7DS_TGACv1_622487_AA2040690.1   -----                         5523
G7ANBS-cDNA2                               TTGTGGAACTGTAGCTGGTACGTAGTAGTATAATTCAGTTCACACCGAAATGCGC   5689
TRIAE_CS42_4AL_TGACv1_288580_AA0952690.1   -----                         5538
TRIAE_CS42_7DS_TGACv1_622487_AA2040690.1   -----                         5523
G7ANBS-cDNA2                               TACTGATAGACCAGCGTGTGAGTCAATTCGGCATGCTCAACTAATTCTTCTTGGCATGT   5749
```

```

TRIAE_CS42_4AL_TGACv1_288580_AA0952690.1 ----- 5538
TRIAE_CS42_7DS_TGACv1_622487_AA2040690.1 ----- 5523

G7ANBS-cDNA2 ACTATTTCGAGTTAGGTCCCTAGCTATGCGTATGGGACGAGTGGAATAAATATGTCTCACT 5809
TRIAE_CS42_4AL_TGACv1_288580_AA0952690.1 ----- 5538
TRIAE_CS42_7DS_TGACv1_622487_AA2040690.1 ----- 5523

G7ANBS-cDNA2 TGTCATACGGTAGCTCTCCCATATGACAAGTGAGATATATTTATTTTGTCTTTTTTTTC 5869
TRIAE_CS42_4AL_TGACv1_288580_AA0952690.1 ----- 5538
TRIAE_CS42_7DS_TGACv1_622487_AA2040690.1 ----- 5523

G7ANBS-cDNA2 TTCAGGTTTATTGA 5884
TRIAE_CS42_4AL_TGACv1_288580_AA0952690.1 ----- 5538
TRIAE_CS42_7DS_TGACv1_622487_AA2040690.1 ----- 5523

```

## 2. 7AS\_TGACv1\_569068\_AA1806240.1(7A 前半段 1-2646bp)与 4AL 与 7DS 比对。

CLUSTAL O(1.2.4) multiple sequence alignment

```

TRIAE_CS42_7AS_TGACv1_569068_AA1806240.1 ATGGGTCGGTCGCCATCTCCACCGGTGTCGCCGGCGTGAAGAAGGCCCGTGGACGGTA 60
TRIAE_CS42_4AL_TGACv1_288580_AA0952690.1 ATGGGGAGGTCAACCGTCTGCGGTAGTGAGGCCCCGTCGAAGAAGGCCCGTGGACGGAG 60
TRIAE_CS42_7DS_TGACv1_622487_AA2040690.1 ATGGGGAGGTGCGCGTCTGCAGCAGTGAGCCCCCCTTGAAGAAGGCCCAATGGACGGAG 60
*****
**** * * * * * * * * * * * * * * * * * * * * * * * * * * * * * * * * * * * *
GAGGAGGATATACTGCTCATAAATACTTCCAGAGGCATGGCAACGGCGCAACTGGCGA 120
GAGGAGGACAGGCTGCTGTGGACTACATCAAGTTGCATGGCACC GGCGCAACTGGCGA 120
GAGGAGGACAGGCTGCTGTGGACTACATCAAGTTGCATGGCACC GGCGCAACTGGCGA 120
***** * * * * * * * * * * * * * * * * * * * * * * * * * * * * * * * * * * * *
ACCTTGCCCAGTGCGCCGCCCTGAACCGCTCCGGCAAGAGCTGCCGCTCCGCTGGACC 180
ACCATCCCAAGCGCGCTGCCCTCAACCGCTGCGGCAAGAGCTGCCGCTCCGTTGGACC 180
ACCATCCCAAGCGCGCGCCTCAACCGCTGCGGCAAGAGCTGCCGCTCCGTTGGACC 180
*** * * * * * * * * * * * * * * * * * * * * * * * * * * * * * * * * * * * *
AACTACTCCGCCCAACATCAAGCGCGAACCTTACCAGCAGTGGGAGAAAAACCATC 240
AACTACTCCACCCGACATCAAGCGCGGACCTTACCAGCAGTGGGAGAAAAACCACC 240
AACTACTCCACCCGACATCAAGCGCGGACCTTACCAGCAGTGGGAGAAAAACCACC 240
***** * * * * * * * * * * * * * * * * * * * * * * * * * * * * * * * * * * * *
ATACACTCCACTCCATTCACGGGAACAAGTGTGCGGATCGCGACTATTGCCGGG 300
ATCCACTCCACTCCATGCTCGGCAACAAGTGTGCGGATTGCAACCCATGCGGGGA 300
ATCCACTCCACTCCATGCTCGGCAACAAGTGTGCGGATTGCAACCCATGCGAGGA 300

```

```

** ***** * ** ***** ** ** ** **
TRIAE_CS42_7AS_TGACv1_569068_AA1806240.1 AGAACAGGCAATTTTATCAAGAATTACTGGAACAGAACCTGCGCAAGAAGCTGCCAG 360
TRIAE_CS42_4AL_TGACv1_288580_AA0952690.1 AGGACAGGCAATTTTATCAAGAATTACTGGAACATGAACCTGCGCAAGAAGCTACTCCAC 360
TRIAE_CS42_7DS_TGACv1_622487_AA2040690.1 AGGACAGGCAATTTTATCAAGAATTACTGGAACACAAACCTGCGCAAGAAGCTGCCAC 360
** ***** ***** **
TRIAE_CS42_7AS_TGACv1_569068_AA1806240.1 ATGGGCATCAACCCCGTCACGCACCGACACTGAC---CTCAGCATGCTCAAGGGGCTC 417
TRIAE_CS42_4AL_TGACv1_288580_AA0952690.1 ATGGGCATCGACCCCATCAGCAGACCCCGCGCGGACCTCAGCCAGCTTACAGGGCTC 420
TRIAE_CS42_7DS_TGACv1_622487_AA2040690.1 ATGGGCATCGACCCCATCAGCAGACCCCGCGCGGACCTCAGCCAGCTTACAGGGCTC 420
***** ** * **
TRIAE_CS42_7AS_TGACv1_569068_AA1806240.1 CCCGGCTGCACCCGCT----GCCCCGGTAATAGCCTCTCCTCTGTGTGTCAGCATG 471
TRIAE_CS42_4AL_TGACv1_288580_AA0952690.1 CCCAGTCTCCCCGCCACCGCCCGCCCCAGTAATAGCCTCTC---CGGCGTCAGCATG 477
TRIAE_CS42_7DS_TGACv1_622487_AA2040690.1 CCCAGTCTCCCCGCCACCGCCCGCCCCAGTAATAGCCTCTC---CAGCGTCAGCATG 477
** * * * ** * ***** **
TRIAE_CS42_7AS_TGACv1_569068_AA1806240.1 -----GGCACCAGGGCACAGCCCCACCAACGCGGCCAGCTTCGCC 513
TRIAE_CS42_4AL_TGACv1_288580_AA0952690.1 GGCCCCAGCGCCTGGGACATGAATGCTGTCCAGGCCACGCGGACGTGGCCAGCTTCGCC 537
TRIAE_CS42_7DS_TGACv1_622487_AA2040690.1 CCCCCAGCACCTGGGACATGAATGCTGCCAGGCCACGCTGACGTGGCCAGCTTCGCC 537
* * ** ***** * ** *****
TRIAE_CS42_7AS_TGACv1_569068_AA1806240.1 GGGAGCAGCTCGGACATGAACACTCTCGGGATCAAGGACAAAGCCAGCTTCGCCGGG 573
TRIAE_CS42_4AL_TGACv1_288580_AA0952690.1 GGGGGCGGCTCGGACATGAACACTCTCAGGATCAAGGACGAAGCTACCAGCTTCACGGC 597
TRIAE_CS42_7DS_TGACv1_622487_AA2040690.1 GGGGGC-----GGTCTCAGGATCAAGGACGAAGCTACCAGCTTCACCGGC 582
** * ***** ***** **
TRIAE_CS42_7AS_TGACv1_569068_AA1806240.1 AGCAGCAGCTCGGACATGACTACTCTCGGGTCAAGGACGAAGCCAGCTTCAGTGGC 633
TRIAE_CS42_4AL_TGACv1_288580_AA0952690.1 ---AGCTACTCAGACATGAAACCTCCCAGGATCAAGGATGAAGCCAGCAGCTTCACGGT 654
TRIAE_CS42_7DS_TGACv1_622487_AA2040690.1 ---AGTTACTCAGACATGAAACCTCCTATGATCAAGGATGAAGCCAGCAGCTTACCGGC 639
** ** ***** ** * ***** ***** **
TRIAE_CS42_7AS_TGACv1_569068_AA1806240.1 AGCCACTCAGACATGAAACCTCCCAGGATCAAGGACAAAGCCGACGTTTACCGCAAC 693
TRIAE_CS42_4AL_TGACv1_288580_AA0952690.1 AGCCACTCGGAAATGAAACCTCCCAGAATCAAGTACGAAGCCGACGTTAATCAGTAGC 714
TRIAE_CS42_7DS_TGACv1_622487_AA2040690.1 AGTCACTCGGAACTGAAACCTCCCAGGATCAAGTACGAAGCCAGCTTACCGGTAGC 699
** ***** ** ***** ** ***** ** * * * * *
TRIAE_CS42_7AS_TGACv1_569068_AA1806240.1 TACTCGAAGATGAAACCTTTCAGGATCAAGGACGAAGCACTCAGCTTCACTGGCAGTAC 753
TRIAE_CS42_4AL_TGACv1_288580_AA0952690.1 CACTCGGACATGAAACCTCCCAGGATCAAGGACGAAGCCGCGCAGCTTCACTGGAAGACAC 774
TRIAE_CS42_7DS_TGACv1_622487_AA2040690.1 CACTCGGACATGAAACCTCACAGGATCAAGGACGAAGCCGCGCAGCTTCACTGGCAGACAC 759
***** * ***** ***** ***** **
TRIAE_CS42_7AS_TGACv1_569068_AA1806240.1 TCGGACATGAATCTCTCAGGATCAAGGACGAAGCCAGCTTACAGGACGCTACTCG 813
TRIAE_CS42_4AL_TGACv1_288580_AA0952690.1 TCGGACATGAAACCTCTCAGGATCAAGGACGAAGCCGCTTCTCACCGGACGCTACTCG 834

```

|                                          |                                                              |      |
|------------------------------------------|--------------------------------------------------------------|------|
| TRIAE_CS42_7DS_TGACv1_622487_AA2040690.1 | TCGGACATGAAACCTCTCAGGATCAAGGACGAAGCCGCCAGCTTACCCGGCAGTTGCTCG | 819  |
|                                          | ***** **                                                     |      |
| TRIAE_CS42_7AS_TGACv1_569068_AA1806240.1 | GACATTAATCTGTGAGTCCAGGACGAAACCACCAGCTTACTGGCAGTACTCGGCC      | 873  |
| TRIAE_CS42_4AL_TGACv1_288580_AA0952690.1 | GACAGGAAACCTCCAGGATCCAGGACGAAG-----GCAGTACTCAGGC             | 879  |
| TRIAE_CS42_7DS_TGACv1_622487_AA2040690.1 | GACAGGAAACCTCCAGGATCCAGAACGAAG-----GCAGTACTCAGGC             | 864  |
|                                          | **** ** * ** ***** ** ***** * *                              |      |
| TRIAE_CS42_7AS_TGACv1_569068_AA1806240.1 | ACCGGACTGGCTGGGACATGAATGCTCTCCGGCTCCAGGCCACCCGACAAGTTC       | 933  |
| TRIAE_CS42_4AL_TGACv1_288580_AA0952690.1 | GCTGTTGCTGGCTGGGACATGAACACTCTCCATGTCCAGCCCAACCCGCCAAGTTC     | 939  |
| TRIAE_CS42_7DS_TGACv1_622487_AA2040690.1 | GCTGTTGCTGGCTGGGACATGAACACTCTCCATGTCCAGCCCAACCCGCCAAGTTC     | 924  |
|                                          | * * ***** ***** ** **** * * * * *****                        |      |
| TRIAE_CS42_7AS_TGACv1_569068_AA1806240.1 | CAGCTCTCCAGGACCATTTGTTGGGTGATCAGTCTCGTTGGGCGCCATGAGAGCCCTT   | 993  |
| TRIAE_CS42_4AL_TGACv1_288580_AA0952690.1 | CATCTCTCCAGGCCATTGTTGGGTGATCAGTCTCCTTGGGCGCCATGAGAGCTCTT     | 999  |
| TRIAE_CS42_7DS_TGACv1_622487_AA2040690.1 | CATCTCTCCAGGCCATTGTTGGGTGATCAGTCTCCTTGGGCGCCATGAGAGCTCTT     | 984  |
|                                          | ** ***** ***** ***** ***** **                                |      |
| TRIAE_CS42_7AS_TGACv1_569068_AA1806240.1 | GTTGAGAAGCTGGACATGCTGCTAGCTTATTCATCTCCTCAGGAATGCTCTCCAAG     | 1053 |
| TRIAE_CS42_4AL_TGACv1_288580_AA0952690.1 | GTTGGGAAGCTGGACGTGCTGCTAGATGATTTCATCTCAGAAATCTTCTCCAAG       | 1059 |
| TRIAE_CS42_7DS_TGACv1_622487_AA2040690.1 | GTTGGGAAGCTGGACATGCTGCTAGATGATTTCATCTCAGAAATCTTCTCCAAG       | 1044 |
|                                          | **** ***** ***** * ***** ***** ** * *****                    |      |
| TRIAE_CS42_7AS_TGACv1_569068_AA1806240.1 | AGGGTGAAGGATGGGATGCACCTTCTCAAAGATGACCTTGAAGAGATAAGCTCTACCTT  | 1113 |
| TRIAE_CS42_4AL_TGACv1_288580_AA0952690.1 | AGGGTGAAGGATGGGATGCACCTTCTCAAAGATGATGGAAGAGCTAAGCTCTACCTT    | 1119 |
| TRIAE_CS42_7DS_TGACv1_622487_AA2040690.1 | AGGGTGAAGGATGGGATGCACCTTCTCAAAGATGATGGAAGAGATAAGCTCTACCTT    | 1104 |
|                                          | ***** ***** ** * ***** * ***** *****                         |      |
| TRIAE_CS42_7AS_TGACv1_569068_AA1806240.1 | GATGAACTTTAGAGGTTGAGGACCTCCCGATGGCCATGTGCTGGATGAATGAGGCA     | 1173 |
| TRIAE_CS42_4AL_TGACv1_288580_AA0952690.1 | GATGAACTGTCAGAGGTGATGACCATCCCAATAGCCATGTGCTGGATGAATGAGGCG    | 1179 |
| TRIAE_CS42_7DS_TGACv1_622487_AA2040690.1 | GATGAACTGTCAGAGGTGATGACCATCCCAATAGCCATGTGCTGGATGAATGAGGCG    | 1164 |
|                                          | ***** * ***** ** **** ***** ** *****                         |      |
| TRIAE_CS42_7AS_TGACv1_569068_AA1806240.1 | CGCGAAGTCTTATGACATGGAGATTACATTGACAGCTTATTATTATGTGTGCCACCT    | 1233 |
| TRIAE_CS42_4AL_TGACv1_288580_AA0952690.1 | CGTGATCTGCTTACGACATGGAGATTACATTGACAGCCTTTT---ATCTGTGCCACCT   | 1236 |
| TRIAE_CS42_7DS_TGACv1_622487_AA2040690.1 | CGTGACCTGCTTACGACATGGAGATTACATTGACAGCCTTTT---ATCTGTGCCACCT   | 1221 |
|                                          | ** ** ***** ***** ***** * * ** *****                         |      |
| TRIAE_CS42_7AS_TGACv1_569068_AA1806240.1 | GACCATTTCAACAAAATAAGAAGAGGAAGAATAAAAAAGAGATAATAAAGAAGAGG     | 1293 |
| TRIAE_CS42_4AL_TGACv1_288580_AA0952690.1 | GACCATTTCAACAAAACAAGAAGAAGAAAAACAAGAAGATGATGACCATAAAGAAGAGG  | 1296 |
| TRIAE_CS42_7DS_TGACv1_622487_AA2040690.1 | GACCATTTCAACAAAACAAGAAGAAGAAAAACAAGAAGATGATGACCATAAAGAAGAGG  | 1281 |
|                                          | ***** ***** ** * * * * * * *****                             |      |
| TRIAE_CS42_7AS_TGACv1_569068_AA1806240.1 | CTCAAGTGGCAGACAGATCACATACATTGCGCAAGTGTGAGAACATGGTGTGAGGACC   | 1353 |

|                                          |                                                               |      |
|------------------------------------------|---------------------------------------------------------------|------|
| TRIAE_CS42_4AL_TGACv1_288580_AA0952690.1 | CTCAAAATGGTACAAAACAGATCACATACGTACGCAAGTGTGAGAACATGGTGTCAAGACC | 1356 |
| TRIAE_CS42_7DS_TGACv1_622487_AA2040690.1 | CTCAAAATGGTACAAAACAGATCACATACGTATGCAAGTGTGAGAACATGGTGTCAAGACC | 1341 |
|                                          | ***** ** * ***** * *****                                      |      |
| TRIAE_CS42_7AS_TGACv1_569068_AA1806240.1 | AGCAAACGCATTTCATGTTACTGTTGTCCCTCTTCCCAAAAAGTCCAAGATTGCGGAA    | 1413 |
| TRIAE_CS42_4AL_TGACv1_288580_AA0952690.1 | AGCAAACGCATTTCATGTTACTGTTGTCCCTCTTCCCAAGAAGCCCAAGATTGCGGAA    | 1416 |
| TRIAE_CS42_7DS_TGACv1_622487_AA2040690.1 | AGCAAACGCATTTCATGTTACTGTTGTCCCTCTTCCCAAGAAGCCCAAGATTGCGGAA    | 1401 |
|                                          | ***** ***** ***** ***** ** *****                              |      |
|                                          | G7A-OligF                                                     |      |
| TRIAE_CS42_7AS_TGACv1_569068_AA1806240.1 | ACAATATCAGAATTCAGGATCTATGTCCAGGAGCAATTGAACGGCATGACAGGTATAAGC  | 1473 |
| TRIAE_CS42_4AL_TGACv1_288580_AA0952690.1 | ACAATTCAGATTCAGGATCTATGTCCAGGAGCCATTGAACGGTACGATAGATATATG     | 1476 |
| TRIAE_CS42_7DS_TGACv1_622487_AA2040690.1 | ACAATTCAGATTCAGGATCTATGTCCAGGAGCTATTGAACGGTATGACAGATATAAT     | 1461 |
|                                          | ***** ***** ***** ***** * * * * *                             |      |
| TRIAE_CS42_7AS_TGACv1_569068_AA1806240.1 | CTCCATTGTTGCAGCAACTTGAGGAGACATACATTCTGTCCAATGGCCGTATGCTTCCA   | 1533 |
| TRIAE_CS42_4AL_TGACv1_288580_AA0952690.1 | CTCCATTGTTGCAGCAACTTGAGGAGAGCTACATTCTGTCCACTGGCCATATGCTTCCA   | 1536 |
| TRIAE_CS42_7DS_TGACv1_622487_AA2040690.1 | CTCCATTGTTGCAGCAACTTGAGGAGAGCTACATTCTGTCCACTGGCCATATGCTTCCA   | 1521 |
|                                          | ***** ***** ***** *****                                       |      |
| TRIAE_CS42_7AS_TGACv1_569068_AA1806240.1 | ATGCCATATGAAGAAACCGATGATCATGTTGTAATCGATGGCCGTATGAATGAGTTTATC  | 1593 |
| TRIAE_CS42_4AL_TGACv1_288580_AA0952690.1 | ATGCACTATGAAGAAACCAATGATCATGTTGTAATGATGGCCGTATGAATGAGTTTATC   | 1596 |
| TRIAE_CS42_7DS_TGACv1_622487_AA2040690.1 | ATGCACTATGAAGAAACCAATGATCAGTTGTAATGATGGCCGTATGAATGAGTTTATC    | 1581 |
|                                          | **** ***** ***** ***** ***** *****                            |      |
| TRIAE_CS42_7AS_TGACv1_569068_AA1806240.1 | AACTACTGGTAGCTGATGTTGCTGCAGATCAGCAGCAGCTCAAGTGGTATCTGTCCTT    | 1653 |
| TRIAE_CS42_4AL_TGACv1_288580_AA0952690.1 | GACTCACTGGTGGCTGATATTGGCAGATCAGCAGCAGCTCAAGTGGTATCTGTCCTT     | 1656 |
| TRIAE_CS42_7DS_TGACv1_622487_AA2040690.1 | GACTCACTGGTGG-----CAGATCAGCAGCAGCTCAAGTGGTATCTGTCCTT          | 1629 |
|                                          | ***** * *****                                                 |      |
| TRIAE_CS42_7AS_TGACv1_569068_AA1806240.1 | GGATCGGATGTCTGGGTAAAACACTTGCCTGCAAAAGTGTGACAAAAGAAATGGGATG    | 1713 |
| TRIAE_CS42_4AL_TGACv1_288580_AA0952690.1 | GGATCTGGATGTCTGGGTAAAACACTTGCCTGCAAAAGTGTGACAAAAGAAATGGGATA   | 1716 |
| TRIAE_CS42_7DS_TGACv1_622487_AA2040690.1 | GGATTTGGATGTCTGGGTAAAACACTTGCCTGCAAAAGTGTGACAAAAGAAATGGGATG   | 1689 |
|                                          | **** ***** ***** *****                                        |      |
| TRIAE_CS42_7AS_TGACv1_569068_AA1806240.1 | CAATTGATTGCAGAGCTTTCATTCGAGTGTCCAAAAGCCTGATATGAAGAGCCTTCTT    | 1773 |
| TRIAE_CS42_4AL_TGACv1_288580_AA0952690.1 | CAATTGATTGCAGAGCTTTCATTCGGATGCCAAAAGCCGGATATGCAGATACTTTTC     | 1776 |
| TRIAE_CS42_7DS_TGACv1_622487_AA2040690.1 | CAATTGATTGCAGAGCTTTCATTCGAGTGTCCAAAAGCCTGATATGCAGATACTTTTC    | 1749 |
|                                          | ***** ***** ***** ** ***** ***** ** * * *                     |      |
| TRIAE_CS42_7AS_TGACv1_569068_AA1806240.1 | CACAACCTGTTCTGCAACTCCATAAGAAGAAGCAGCCACTACCTGCCAATTGTAATGAA   | 1833 |
| TRIAE_CS42_4AL_TGACv1_288580_AA0952690.1 | TGCGACTGTTCTCACAACCTCCACAGAAAAGCGGCCACTACATGCCAATTCTAATGAG    | 1836 |
| TRIAE_CS42_7DS_TGACv1_622487_AA2040690.1 | TGCGACTGTTCTCACAACCTCCACAGAAAAGCGGCCAATACATGCCAATTCTAATGAG    | 1809 |
|                                          | * * * ***** ***** ** * * * * * ***** *****                    |      |



TRIAE\_CS42\_7AS\_TGACv1\_569068\_AA1806240.1 CTTGGCATCAGCGACATTAATATCAGCAAAACATCTGCAAGATAAAAAGGTATCTAATAGTC 1893  
TRIAE\_CS42\_4AL\_TGACv1\_288580\_AA0952690.1 CTTGGCATCAGCGACATTAATATCAGAAAACATCTGCAAGATAAAAAGGTATCTAATTGTT 1896  
TRIAE\_CS42\_7DS\_TGACv1\_622487\_AA2040690.1 CTTGGCATCAGCGACATTAATATCAGCAAAACATCTGCAAGATAAAAAGGTAC2AATTATT 1869

\*\*\*\*\*

TRIAE\_CS42\_7AS\_TGACv1\_569068\_AA1806240.1 ATTGATGACTTGTGGGATGCATCAGCATGGGATATTATTAATGTGCTTTCCGAAGGGA 1953  
TRIAE\_CS42\_4AL\_TGACv1\_288580\_AA0952690.1 ATTGATGATTGTGGGACGCATCAGCATGGGATATTCAAGTATGCCTTTCCAATGGA 1956  
TRIAE\_CS42\_7DS\_TGACv1\_622487\_AA2040690.1 ATTGATGATTGTGGGACGCATCAGCATGGGATATTCAAATATGCTTTCCAATGGA 1929

\*\*\*\*\*

TRIAE\_CS42\_7AS\_TGACv1\_569068\_AA1806240.1 AGCCATGGCAGTAGAATAATAAACCACACAGATTGAAGATTTGCATTAACATGTTGC 2013  
TRIAE\_CS42\_4AL\_TGACv1\_288580\_AA0952690.1 AACCGTGGCAGCAGAATAATAAATACTACAGATTGAAGATTTGCATTAACATGTTGC 2016  
TRIAE\_CS42\_7DS\_TGACv1\_622487\_AA2040690.1 AACCGTGGCAGCAGAATAATAAATACTACAGATTGAAGATTTGCATTAACATGTTGC 1989

\*\*\*\*\*

G7A-RTF

TRIAE\_CS42\_7AS\_TGACv1\_569068\_AA1806240.1 TGTGATCACTGGGAGCATGTTTCGAGATGAAACCTCTGACGACGATCACTCAAGAAAAG 2073  
TRIAE\_CS42\_4AL\_TGACv1\_288580\_AA0952690.1 TCTGATCACTCAGAACATGTTTCGAGATGAAACCTCTGACGAGATCACTCAAGAAAAG 2076  
TRIAE\_CS42\_7DS\_TGACv1\_622487\_AA2040690.1 TGTGATCACTCAGAACATGTTTCATGATGAAACCTCTGATGACGATCACTCAAGAAAAG 2049

\*\*\*\*\*

TRIAE\_CS42\_7AS\_TGACv1\_569068\_AA1806240.1 CTATTCTTTAACAGACTTTTGGTCTGAAAGTGACTGTCTGAAGAATTCAAAACAGTT 2133  
TRIAE\_CS42\_4AL\_TGACv1\_288580\_AA0952690.1 CTATTCTTTAACAGGCTTTTGGTCTGGAAGTGACTGTCTGAAGAATTTAAAACAGTT 2136  
TRIAE\_CS42\_7DS\_TGACv1\_622487\_AA2040690.1 CTGTTCTTTAACAGACTTTTGGTCTGGAAGTGACTGCCCTGAAGAATTTAAAACAGTT 2109

\*\*\*\*\*

TRIAE\_CS42\_7AS\_TGACv1\_569068\_AA1806240.1 TCAAATGAAATGTTGATATATGTGGTGGTTGCCGCTAGCAACAATCAATATAGCTAGT 2193  
TRIAE\_CS42\_4AL\_TGACv1\_288580\_AA0952690.1 TCAAATGAAATGTTGATGATGTGGTGGTTGCCGCTAGCTAGCATCAACATAGCTACT 2196  
TRIAE\_CS42\_7DS\_TGACv1\_622487\_AA2040690.1 TCAAATGAAATGTTGATGATGTGGTGGTTGCCGCTAGCTATGATCAACATAGCTAGT 2169

\*\*\*\*\*

TRIAE\_CS42\_7AS\_TGACv1\_569068\_AA1806240.1 CATTGGCAAACCAACAGACAGATTAGCACTTGATTGCTGGCATAACATGTGTGATTCA 2253  
TRIAE\_CS42\_4AL\_TGACv1\_288580\_AA0952690.1 CATTGGCAAATCAACAGAAAGCAGTATCACTGGATTTCTGACATACATACGTGATTGG 2256  
TRIAE\_CS42\_7DS\_TGACv1\_622487\_AA2040690.1 CATTGGCAAATCAACAGACAGCAGTATCACTGGATTTCTGACATACATACGTGATTGG 2229

\*\*\*\*\*

G7A-O1igR

TRIAE\_CS42\_7AS\_TGACv1\_569068\_AA1806240.1 CTGAGGTCACATCTTGGTCAAGTTCTACCTGGAAAGAACGAGAAAAGTACTGAACTT 2313  
TRIAE\_CS42\_4AL\_TGACv1\_288580\_AA0952690.1 TTGAGGTCACAATCGTGGTCAAGTTCTGCTCGGAAAGAACAGACAAGTACTGAACTTC 2316  
TRIAE\_CS42\_7DS\_TGACv1\_622487\_AA2040690.1 TTGAGGTCACAATCGTGGTCAAGTTCTACTTCGGAAGAACAGACAAGTACTGAACTTC 2289

\*\*\*\*\*

TRIAE\_CS42\_7AS\_TGACv1\_569068\_AA1806240.1 AGCTACAATAATCTTCTCAGCATCTGAAGACATGTTGCTGATTTTCATATGTATCCA 2373  
TRIAE\_CS42\_4AL\_TGACv1\_288580\_AA0952690.1 AGCTACAATGATCTTCTCATCTGAAGACATGTTGTTGTATCTTCATATGTATCCA 2376  
TRIAE\_CS42\_7DS\_TGACv1\_622487\_AA2040690.1 AGCTACAATAATCTTCTCATCTGAAGACATGTTGTTGTATCTTCATATGTATCCA 2349

\*\*\*\*\*

|                                          |                                                               |      |
|------------------------------------------|---------------------------------------------------------------|------|
| TRIAE_CS42_7AS_TGACv1_569068_AA1806240.1 | GAGGGCTCCATAATCTGGAAGGATGATCTGGTGAAGCAATGGGTGGCTGAAGGGTTTGT   | 2433 |
| TRIAE_CS42_4AL_TGACv1_288580_AA0952690.1 | GAGGGCTCCATAGTCTGGAAGGATGATCTGGTGAAGCAATGGGTGGCTGAAGCC TTCATC | 2436 |
| TRIAE_CS42_7DS_TGACv1_622487_AA2040690.1 | GAGGGCTCCATAGTCTGGAAGGATGATCTGGTGAAGCAATGGGTGGCTGAAGCC TTCATC | 2409 |
|                                          | ***** ** *                                                    |      |
| TRIAE_CS42_7AS_TGACv1_569068_AA1806240.1 | GCTACAGGAAAAGGAAAGCAAGA TAAAGAAACGACAGAAAAC TGCAGGAATCTAT     | 2493 |
| TRIAE_CS42_4AL_TGACv1_288580_AA0952690.1 | AATACACGAAAAGGAAAGAAAAGATCAA AACTGGATGGAGAAAGCTGCAGGAATCTAT   | 2496 |
| TRIAE_CS42_7DS_TGACv1_622487_AA2040690.1 | AATACACGAAAAGGAAAGAAAAGATCAA AACTGGATGGAGAAAGCTGCAGGAATCTAT   | 2469 |
|                                          | *** ** * ** *                                                 |      |
| TRIAE_CS42_7AS_TGACv1_569068_AA1806240.1 | TTGTATGCGCTTGTGTAGAGAAGATTCATTC AACCTTTATATCAACTACAACAATAAG   | 2553 |
| TRIAE_CS42_4AL_TGACv1_288580_AA0952690.1 | TTCGATGAACTTGTGTAGAGAAGATTCATTC AACCCCTAAATATCAACTACAACAATAAG | 2556 |
| TRIAE_CS42_7DS_TGACv1_622487_AA2040690.1 | TTCGATGAACTTGTGTAGAGAAGATTCATTC AACCTCTAAATATCAACTACAACAATAAG | 2529 |
|                                          | ** ** ** ** *                                                 |      |
| TRIAE_CS42_7AS_TGACv1_569068_AA1806240.1 | GTGTTGCTCTGTACAGTTCATGACGTAGTACGTGATCTTATGCAAAAAGTCTGCAGAA    | 2613 |
| TRIAE_CS42_4AL_TGACv1_288580_AA0952690.1 | GTGTTGCTCTGTACTGTTCAAGTGGTACGTGATCTTCTTGCACACAAGTCTG-----     | 2611 |
| TRIAE_CS42_7DS_TGACv1_622487_AA2040690.1 | GTGTTGCTCTGTACTGTTCAAGTGGTACGTGATCTTCTTGCACACAAGTCTGCAGAA     | 2589 |
|                                          | ***** ** *                                                    |      |
| TRIAE_CS42_7AS_TGACv1_569068_AA1806240.1 | GAGAAATTCATTGTGGTAGTAGACTACAATGA-----                         | 2646 |
| TRIAE_CS42_4AL_TGACv1_288580_AA0952690.1 | -----TGGTAGTAGATTATAATCGAAAGAATATATCACTTTCTCATAAGGCC          | 2658 |
| TRIAE_CS42_7DS_TGACv1_622487_AA2040690.1 | GAGAAATTCATTGTGGTAGTAGATTATAATCGAAAGAATATATCACTTTCTCATAAGGCC  | 2649 |
|                                          | ***** ** ** *                                                 |      |
| TRIAE_CS42_7AS_TGACv1_569068_AA1806240.1 | -----                                                         | 2646 |
| TRIAE_CS42_4AL_TGACv1_288580_AA0952690.1 | CGTCGGCTATCTCTCTCTTGGCAATGCAAGTTATGCCAAGACACCTGTAAACATCACA    | 2718 |
| TRIAE_CS42_7DS_TGACv1_622487_AA2040690.1 | CGTCGGCTATCTCTCTCTTGGCAATGCAAGTTATGCCAAGACACCTGTAAACATCACA    | 2709 |
| TRIAE_CS42_7AS_TGACv1_569068_AA1806240.1 | -----                                                         | 2646 |
| TRIAE_CS42_4AL_TGACv1_288580_AA0952690.1 | AAGGCGCAGGTTGGTCACTTAATTTTGTGGATTGTTGAGTGCATGCCTTGTATTGGA     | 2778 |
| TRIAE_CS42_7DS_TGACv1_622487_AA2040690.1 | AAGGCGCAAGTTGGTCACTTAATTTTGTGGATTGTTGAGTGCATGCCTTGTATTGGA     | 2769 |
| TRIAE_CS42_7AS_TGACv1_569068_AA1806240.1 | -----                                                         | 2646 |
| TRIAE_CS42_4AL_TGACv1_288580_AA0952690.1 | GAGTTCAAGGTTCTCCGTGTTCTGAACCTTCAACTATCCGGTCATTGTGGCACCATGAC   | 2838 |
| TRIAE_CS42_7DS_TGACv1_622487_AA2040690.1 | GAGTTCAAGGTTCTCCGTGTTCTGAACCTTCAACTATCCGGTCATTGTGGCACCATGAC   | 2829 |
| TRIAE_CS42_7AS_TGACv1_569068_AA1806240.1 | -----                                                         | 2646 |
| TRIAE_CS42_4AL_TGACv1_288580_AA0952690.1 | CCCATAGACCTCACTGGGATTTCAGAACTGTTTCAGTTGAGATATTTGAAGATTACAAGT  | 2898 |
| TRIAE_CS42_7DS_TGACv1_622487_AA2040690.1 | CCCATAGACCTCACTGGGATTTCAGAACTGTTTCAGTTGAGATATTTGAAGATTACAAGT  | 2889 |

|                                          |                                                               |      |
|------------------------------------------|---------------------------------------------------------------|------|
| TRIAE_CS42_7AS_TGACv1_569068_AA1806240.1 | -----                                                         | 2646 |
| TRIAE_CS42_4AL_TGACv1_288580_AA0952690.1 | GATGTGTGCATAAACTACCAAACCAATGCGAAAGCTGCAATGTTGGAAACGCTGGAT     | 2958 |
| TRIAE_CS42_7DS_TGACv1_622487_AA2040690.1 | GATGTGTGCATAAACTACCAAACCAATGCGAAAGCTGCAATGTTGGAAACGCTGGAT     | 2949 |
| TRIAE_CS42_7AS_TGACv1_569068_AA1806240.1 | -----                                                         | 2646 |
| TRIAE_CS42_4AL_TGACv1_288580_AA0952690.1 | ATTATAGATGCACCAAGAGTCACTGCTATCCCGTGGGATATTATATATCTCCCACACTTG  | 3018 |
| TRIAE_CS42_7DS_TGACv1_622487_AA2040690.1 | ATTATAGATGCACCAAGAGTCACTGCTATCCCATGGGATATTATATATCTCCCACACTTG  | 3009 |
| TRIAE_CS42_7AS_TGACv1_569068_AA1806240.1 | -----                                                         | 2646 |
| TRIAE_CS42_4AL_TGACv1_288580_AA0952690.1 | TTGCACCTTGACGCTTCCTGTTGACACAAATCTGCTGGATTGGATTGGCAGCATGACTGGC | 3078 |
| TRIAE_CS42_7DS_TGACv1_622487_AA2040690.1 | TTGCACCTAACCTTCCTGTTGACACAAATCTGCTGGATTGGATTGGCAGCATGACTGAC   | 3069 |
| TRIAE_CS42_7AS_TGACv1_569068_AA1806240.1 | -----                                                         | 2646 |
| TRIAE_CS42_4AL_TGACv1_288580_AA0952690.1 | TCCATCATCAGTCTGTGGAGCCTTGGCAACCTGAACTACCTGCAAGATCTTTATCTTACC  | 3138 |
| TRIAE_CS42_7DS_TGACv1_622487_AA2040690.1 | TCCATCATCAGTCTGTGGAGCCTTGGCAACCTGAACTACCTGCAAGATCTTTATCTTACC  | 3129 |
| TRIAE_CS42_7AS_TGACv1_569068_AA1806240.1 | -----                                                         | 2646 |
| TRIAE_CS42_4AL_TGACv1_288580_AA0952690.1 | ATTCTTCTACACATCCTTCTGGCCATCCAGAGAAAACATGGAAGCTCTGGGTCTTTA     | 3198 |
| TRIAE_CS42_7DS_TGACv1_622487_AA2040690.1 | ATTCTTCTACACATCCTTCTGGCCATCCAGAGAAAACATGGAAGCTCTGGGTCTTTA     | 3189 |
| TRIAE_CS42_7AS_TGACv1_569068_AA1806240.1 | -----                                                         | 2646 |
| TRIAE_CS42_4AL_TGACv1_288580_AA0952690.1 | CTAGGAGGACATGGCAACCTGAAAATTATAGTAGTGTCTCATGGCCATTGGTTAAAGAT   | 3258 |
| TRIAE_CS42_7DS_TGACv1_622487_AA2040690.1 | CTAGGAGGACATGGCAACCTGAAAATTATAGTAGTGTCTCATGGCCATCGGTTAAAGAT   | 3249 |
| TRIAE_CS42_7AS_TGACv1_569068_AA1806240.1 | -----                                                         | 2646 |
| TRIAE_CS42_4AL_TGACv1_288580_AA0952690.1 | ATTGTGGTTCCTGGTGCCTCAAAAGTAATCATTCTGGGATGAGTTGGAACCTCTCCA     | 3318 |
| TRIAE_CS42_7DS_TGACv1_622487_AA2040690.1 | ATTGTGGTTCCTGGTGCCTCAAAAGTAATCATTCTGGGATGAGTTGGAACCTCTCCA     | 3309 |
| TRIAE_CS42_7AS_TGACv1_569068_AA1806240.1 | -----                                                         | 2646 |
| TRIAE_CS42_4AL_TGACv1_288580_AA0952690.1 | CTTCTCCAGAGATTGAATGCTCGCCACACAGCTGCGTCATATTTCCCGAATTCCTAGG    | 3378 |
| TRIAE_CS42_7DS_TGACv1_622487_AA2040690.1 | CTTCTCCAGAGATTGAATGCTCACCGCACAGCTGCGTCATATTTCCCGAATTCCTAAG    | 3369 |
| TRIAE_CS42_7AS_TGACv1_569068_AA1806240.1 | -----                                                         | 2646 |
| TRIAE_CS42_4AL_TGACv1_288580_AA0952690.1 | TGGATTA AAAACATGGTAACTTGTGCATTCTGAAGATTGCAGTGGTGGAACTGCAGATG  | 3438 |

|                                          |                                                               |      |
|------------------------------------------|---------------------------------------------------------------|------|
| TRIAE_CS42_7DS_TGACv1_622487_AA2040690.1 | TGGGTAAAAAACTGGTAACTTGTGCATTCTGAAGATTGCAGTGGTGAACGCAGATG      | 3429 |
| TRIAE_CS42_7AS_TGACv1_569068_AA1806240.1 | -----                                                         | 2646 |
| TRIAE_CS42_4AL_TGACv1_288580_AA0952690.1 | AGTTGTGTGATATTCTCAGAGGATTGCCTGCCCTCACTGCTCTGTCGCTGTATGTGCGG   | 3498 |
| TRIAE_CS42_7DS_TGACv1_622487_AA2040690.1 | AGTTGTGTGATATTCTCAGAGGATTGCCTGCCCTTACTGCTCTGTCGCTGTATGTGCGG   | 3489 |
| TRIAE_CS42_7AS_TGACv1_569068_AA1806240.1 | -----                                                         | 2646 |
| TRIAE_CS42_4AL_TGACv1_288580_AA0952690.1 | TGCGCGCTGCTCAAAGGATCCTTTGACAAGATGGCCGGTTTTCAGTTCTCAAGTAC      | 3558 |
| TRIAE_CS42_7DS_TGACv1_622487_AA2040690.1 | TGCGCGCTGCTCAAAGGATCCTTTGACAAGATGGCCGGTTCTCAGTTCTCAAGTAC      | 3549 |
| TRIAE_CS42_7AS_TGACv1_569068_AA1806240.1 | -----                                                         | 2646 |
| TRIAE_CS42_4AL_TGACv1_288580_AA0952690.1 | TTCAAGTTGAGGTGCACGAGTGGTATCCCATGGCTGAAATTTGAGGCGGATGCAATGCCT  | 3618 |
| TRIAE_CS42_7DS_TGACv1_622487_AA2040690.1 | TTCAAGTTGAGGTTACGAGTGGTATCCCATGGCTGAAATTTGAGGCGGATGCAATGCCT   | 3609 |
| TRIAE_CS42_7AS_TGACv1_569068_AA1806240.1 | -----                                                         | 2646 |
| TRIAE_CS42_4AL_TGACv1_288580_AA0952690.1 | AACCTCTGGAAGCTGAAGCTAGGTTTCAATGCAATCCCCGAATGGACCAACATCAACTA   | 3678 |
| TRIAE_CS42_7DS_TGACv1_622487_AA2040690.1 | AATCTCTGGAAGCTGAAGCTGGGTTTCAATGCAATCCCCGAATGGACCAACATCAACTA   | 3669 |
| TRIAE_CS42_7AS_TGACv1_569068_AA1806240.1 | -----                                                         | 2646 |
| TRIAE_CS42_4AL_TGACv1_288580_AA0952690.1 | ATCTGCATCGAGCATATCCAGACCTTAAAGAGATCTCTGTAAAAATTTGGGGGTAGCT    | 3738 |
| TRIAE_CS42_7DS_TGACv1_622487_AA2040690.1 | ATCCGCATCGAGCATATGCCAGACCTTAAAGAGATCTCTGTAAAAATTTGGGGGTATAGCT | 3729 |
| TRIAE_CS42_7AS_TGACv1_569068_AA1806240.1 | -----                                                         | 2646 |
| TRIAE_CS42_4AL_TGACv1_288580_AA0952690.1 | GCTCTTAGAGTATGCCGTGAAGACTGTCATTAGTAATCATCTGAGAAATCCTAGAGTC    | 3798 |
| TRIAE_CS42_7DS_TGACv1_622487_AA2040690.1 | GCTCTTAGAGTATGCCGTGAAGACGGTCATTAGTAATCATCTGAGAAATCCTAGAGTC    | 3789 |
| TRIAE_CS42_7AS_TGACv1_569068_AA1806240.1 | -----                                                         | 2646 |
| TRIAE_CS42_4AL_TGACv1_288580_AA0952690.1 | CATGTGTGTTTGGTGACTTCTACTTTCTATGGTGCAGAGGACAAAAAGAGAAACCTCCC   | 3858 |
| TRIAE_CS42_7DS_TGACv1_622487_AA2040690.1 | CATGTGTGTTTGGTGACTTCTACTTCTATGGTATGAAAGCACAAAAAGAGAAACCTCCC   | 3849 |
| TRIAE_CS42_7AS_TGACv1_569068_AA1806240.1 | -----                                                         | 2646 |
| TRIAE_CS42_4AL_TGACv1_288580_AA0952690.1 | ACCAACTCGGCGATCAAGTCGCGCATGGCCGCCACAACCCAATGGAGACTCCGACCAGC   | 3918 |
| TRIAE_CS42_7DS_TGACv1_622487_AA2040690.1 | ACCAACTCGGCGGTGAGTCGCACATGGCCCGCAACGTCAACGGAGACTCCGACCAGC     | 3909 |
| TRIAE_CS42_7AS_TGACv1_569068_AA1806240.1 | -----                                                         | 2646 |

|                                          |                                                               |      |
|------------------------------------------|---------------------------------------------------------------|------|
| TRIAE_CS42_4AL_TGACv1_288580_AA0952690.1 | CACGTCACCACCGCCTTCGCCACTGCAACAGTGTCTCGACAGAGGGTGTCTGCTTCC     | 3978 |
| TRIAE_CS42_7DS_TGACv1_622487_AA2040690.1 | CAGGTCACCACCGCCTTCGCCACTGCGACAGTGTCTCGACAGAGGGTGTCTGCTTCC     | 3969 |
| TRIAE_CS42_7AS_TGACv1_569068_AA1806240.1 | -----                                                         | 2646 |
| TRIAE_CS42_4AL_TGACv1_288580_AA0952690.1 | GGGGACGAGATGTGGAGACGCTCTGCCACCTCTCCGACAATCTCGCCACCGCCTTTCGC   | 4038 |
| TRIAE_CS42_7DS_TGACv1_622487_AA2040690.1 | GGGGACGAGATGTGGAGACGCTCTGCCACCTCTCCAACAATCTCGCCACCGCCTTTCGC   | 4029 |
| TRIAE_CS42_7AS_TGACv1_569068_AA1806240.1 | -----                                                         | 2646 |
| TRIAE_CS42_4AL_TGACv1_288580_AA0952690.1 | TCTCAGAAGACTTCACCTTCCTTGTCGACATGCGTGCGTACCGTCCATGCTCTCCGTC    | 4098 |
| TRIAE_CS42_7DS_TGACv1_622487_AA2040690.1 | CCTCAGAAGACTTCACCTTCCTCGTCGACATGCGTGCGTACCGTCCGTCGCTCTCCGTC   | 4089 |
| TRIAE_CS42_7AS_TGACv1_569068_AA1806240.1 | -----                                                         | 2646 |
| TRIAE_CS42_4AL_TGACv1_288580_AA0952690.1 | CAGAGTCCCTTCCTGGATGCCCTTCGCGCGTGTGCGCGTGAAGGGGAGGACACCG       | 4158 |
| TRIAE_CS42_7DS_TGACv1_622487_AA2040690.1 | CGGAGTCCCTTCCTTGATGCCATCTTCGCGCGTGTGCGCGTGAAGGGGAGGCAACCG     | 4149 |
| TRIAE_CS42_7AS_TGACv1_569068_AA1806240.1 | -----                                                         | 2646 |
| TRIAE_CS42_4AL_TGACv1_288580_AA0952690.1 | CTGGACTCCGGGAGCTTCTGGGTGAGGAGGTGGAGTTCGGGTATGAGGCACTGCAGTTG   | 4218 |
| TRIAE_CS42_7DS_TGACv1_622487_AA2040690.1 | CTGGACTCCGGGAGCTTCTGGGTGAGGAGGTGGAGTTCGGGTATGAGGCACTGCAGTTG   | 4209 |
| TRIAE_CS42_7AS_TGACv1_569068_AA1806240.1 | -----                                                         | 2646 |
| TRIAE_CS42_4AL_TGACv1_288580_AA0952690.1 | GTGCTCGAGTACCTGTACACCGCCGCATCCGCGACCTTCCCAAGTCAAGTGCAGTTTGC   | 4278 |
| TRIAE_CS42_7DS_TGACv1_622487_AA2040690.1 | GTGCTCGAGTACCTGTACACCGGCTGCATCCGCGACCTTCCCAAGTCCGATGCAGTTTGC  | 4269 |
| TRIAE_CS42_7AS_TGACv1_569068_AA1806240.1 | -----                                                         | 2646 |
| TRIAE_CS42_4AL_TGACv1_288580_AA0952690.1 | GCCGACGTGGACGGCTGCGCCACGTCGGTTGCCTTCCCGCATCTCCTTCATGGCGCAG    | 4338 |
| TRIAE_CS42_7DS_TGACv1_622487_AA2040690.1 | GCAGACGTGGACGGCTGCGCCATGTCGGCTGCCCTCCCTGCCATCTCGTTTCATGGCGCAG | 4329 |
| TRIAE_CS42_7AS_TGACv1_569068_AA1806240.1 | -----                                                         | 2646 |
| TRIAE_CS42_4AL_TGACv1_288580_AA0952690.1 | GTCATCTTTGCCGCATCCATCTTCGAGGTTGCGGTGCTCACCACCACTTCCAGCGGCTT   | 4398 |
| TRIAE_CS42_7DS_TGACv1_622487_AA2040690.1 | GTCATCTTTGCCGCATCCATCTTCAGGTTGCGGTGCTCACCACCACTTCCAGCGGCTT    | 4389 |
| TRIAE_CS42_7AS_TGACv1_569068_AA1806240.1 | -----                                                         | 2646 |
| TRIAE_CS42_4AL_TGACv1_288580_AA0952690.1 | CTCCTTGATGTCCTTGATGATGTTGAAGTGGATAACCTTCCATTGATCTTATCTGTGCA   | 4458 |
| TRIAE_CS42_7DS_TGACv1_622487_AA2040690.1 | CTCCTTGATGTCCTTGATGATGTTGAAGTGGATAACCTTCCATTGATCTTATCTGTGCG   | 4449 |

|                                          |                                                              |      |
|------------------------------------------|--------------------------------------------------------------|------|
| TRIAE_CS42_7AS_TGACv1_569068_AA1806240.1 | -----                                                        | 2646 |
| TRIAE_CS42_4AL_TGACv1_288580_AA0952690.1 | AACCTTATGCAATAAATCTTGATGCATCTGCTTGAGAGATGCCTTGAGATGGTAGTCCGG | 4518 |
| TRIAE_CS42_7DS_TGACv1_622487_AA2040690.1 | AACCTTATGCAATAAATCTTGATGCATCTGCTCGAGAGATGCCTTGAGATGGTAGTCCGG | 4509 |
| TRIAE_CS42_7AS_TGACv1_569068_AA1806240.1 | -----                                                        | 2646 |
| TRIAE_CS42_4AL_TGACv1_288580_AA0952690.1 | TCAAATCTTGACATGATTACTCTTGAGAAAGCATTGCCTCCAGATGTTATCAAGCAAATT | 4578 |
| TRIAE_CS42_7DS_TGACv1_622487_AA2040690.1 | TCAAATCTTGACATGATTACTCTTGAGAAAGCATTGCCTTCAGATATCATCGAGCAGATT | 4569 |
| TRIAE_CS42_7AS_TGACv1_569068_AA1806240.1 | -----                                                        | 2646 |
| TRIAE_CS42_4AL_TGACv1_288580_AA0952690.1 | ACTGACTCGGGATAAGTCTTGGGTAATTCACCCAAGGACAACGGATTTCCTAACAAA    | 4638 |
| TRIAE_CS42_7DS_TGACv1_622487_AA2040690.1 | ACTGATTCACGGCTAAGTCTGGACTAGTTTCACCCGAAGATAAGGGATTTCCTAACAAA  | 4629 |
| TRIAE_CS42_7AS_TGACv1_569068_AA1806240.1 | -----                                                        | 2646 |
| TRIAE_CS42_4AL_TGACv1_288580_AA0952690.1 | CATGTAAGAAGGATATTCGGAGCTCTCGATTCTTATGATGTGGAGCTAGTGAGGTGCTA  | 4698 |
| TRIAE_CS42_7DS_TGACv1_622487_AA2040690.1 | CATGTAAGAAGGATACTCAGAGCTCTTGATTCTGATGATGTGTGTTTAGTGAGGATGCTG | 4689 |
| TRIAE_CS42_7AS_TGACv1_569068_AA1806240.1 | -----                                                        | 2646 |
| TRIAE_CS42_4AL_TGACv1_288580_AA0952690.1 | CTCTACGAAGGGCAGACTAATCTTGATGATGCATTGTCATTGCTGTAGAACAT        | 4758 |
| TRIAE_CS42_7DS_TGACv1_622487_AA2040690.1 | CTCAAAGAAGGGGGACTAATCTTGATGGTGCATTGTCATTGCACCATGCTGTAGAACAT  | 4749 |
| TRIAE_CS42_7AS_TGACv1_569068_AA1806240.1 | -----                                                        | 2646 |
| TRIAE_CS42_4AL_TGACv1_288580_AA0952690.1 | TGTGACCCAAGATCACACAGAAGTCTTGACCTCGAACTTGCAGATGTTAATCGTAGA    | 4818 |
| TRIAE_CS42_7DS_TGACv1_622487_AA2040690.1 | TGTGACTCGAAGGTCACAATGGAAGTCTGGATATCGGACTTGCAGATGTTAATCATAGA  | 4809 |
| TRIAE_CS42_7AS_TGACv1_569068_AA1806240.1 | -----                                                        | 2646 |
| TRIAE_CS42_4AL_TGACv1_288580_AA0952690.1 | AATCAAAGAGGTATACTGTTCTCACCATTGCTGCCAGGCGAAGAAATCCTAAAATCTT   | 4878 |
| TRIAE_CS42_7DS_TGACv1_622487_AA2040690.1 | AATCAAAGAGGTATACTGTTCTCACCATTGCTGCCAGGCGAAGAGATCCTAAAATCTT   | 4869 |
| TRIAE_CS42_7AS_TGACv1_569068_AA1806240.1 | -----                                                        | 2646 |
| TRIAE_CS42_4AL_TGACv1_288580_AA0952690.1 | GTCTCTGTTTTAACCAAGGAGCTCGGCCTCCGATCTTACATTTGATGGAAGAAAAGCA   | 4938 |
| TRIAE_CS42_7DS_TGACv1_622487_AA2040690.1 | GTCTCTGTTTTAACCAAGGTGCTCGGCATTCTGATCTTACATTTGATGGAAGAAAAGCA  | 4929 |
| TRIAE_CS42_7AS_TGACv1_569068_AA1806240.1 | -----                                                        | 2646 |
| TRIAE_CS42_4AL_TGACv1_288580_AA0952690.1 | ATACAAATCTCAAAGAGACTCACAAAACATGGGGATTACTTTGGATTACTGAAGAAGGA  | 4998 |
| TRIAE_CS42_7DS_TGACv1_622487_AA2040690.1 | GTTCAAATCTCAAAGAGACTCACAAAACATGGGGATTACTTTGGATTACAGAAGAAGGA  | 4989 |

|                                          |                                                               |      |
|------------------------------------------|---------------------------------------------------------------|------|
| TRIAE_CS42_7AS_TGACv1_569068_AA1806240.1 | -----                                                         | 2646 |
| TRIAE_CS42_4AL_TGACv1_288580_AA0952690.1 | AAACCGTCTCCTGAATATAGTTTATGCATTGAGATACTGGAGCAAGCTGAAAGAAGGGGT  | 5058 |
| TRIAE_CS42_7DS_TGACv1_622487_AA2040690.1 | AAACCGTCTCGTGAAGATAGGTTATGCATTAAGATACTGGAGCAAGCTGAAAGAAGGGAT  | 5049 |
| TRIAE_CS42_7AS_TGACv1_569068_AA1806240.1 | -----                                                         | 2646 |
| TRIAE_CS42_4AL_TGACv1_288580_AA0952690.1 | CCACAACCTGGAGAAGCATCGGTTTCTCTTGCAATAGCTGGTGACTGTCAACGTGGGACG  | 5118 |
| TRIAE_CS42_7DS_TGACv1_622487_AA2040690.1 | CCACAACCTGGAGAAGCATCGGTTTCTCTTGCAATAGCTGGTGACCGTCAACGTGGAAG   | 5109 |
| TRIAE_CS42_7AS_TGACv1_569068_AA1806240.1 | -----                                                         | 2646 |
| TRIAE_CS42_4AL_TGACv1_288580_AA0952690.1 | CTGTTGCACCTCGAAAATCGAGTTACTTTGATGAGGATAATGTTTCCAACCTGAGGCAAGA | 5178 |
| TRIAE_CS42_7DS_TGACv1_622487_AA2040690.1 | CTGTTGTACCTCGAAAATCGAGTTGCTTTGATGAGGATAATGTTTCCAACCTGAGGCAAGA | 5169 |
| TRIAE_CS42_7AS_TGACv1_569068_AA1806240.1 | -----                                                         | 2646 |
| TRIAE_CS42_4AL_TGACv1_288580_AA0952690.1 | GTAGCAATGGACATCGCTCAAGTGGATTGCACCTTGGAGTTAACCCCTTGATTCTGAGGCA | 5238 |
| TRIAE_CS42_7DS_TGACv1_622487_AA2040690.1 | ATAGCAATGGACATCGCTCAAGTGGATTGTACTTTGAAGTTAACCCCTTGATTCTGGGGCA | 5229 |
| TRIAE_CS42_7AS_TGACv1_569068_AA1806240.1 | -----                                                         | 2646 |
| TRIAE_CS42_4AL_TGACv1_288580_AA0952690.1 | AAACCTCCTTCGGAGAAAGAGTGGCAACCATTGATCTAAATGAAACTCGTTTCCAAATG   | 5298 |
| TRIAE_CS42_7DS_TGACv1_622487_AA2040690.1 | AAACCTCCTTCGGAGAAAGAACTGGCAACCATTGATCTAAATGAAACTCCTTTCCATATG  | 5289 |
| TRIAE_CS42_7AS_TGACv1_569068_AA1806240.1 | -----                                                         | 2646 |
| TRIAE_CS42_4AL_TGACv1_288580_AA0952690.1 | AATGACGAACACTTAGCTCGGATGAGTGCCCTCTTCAAACAGTTGAACTCTGTAAACGC   | 5358 |
| TRIAE_CS42_7DS_TGACv1_622487_AA2040690.1 | AATGAAGAACACTTAGCTCGGATGAGTACCCCTCTCAAACAGTTGAACTCTGTAAACGC   | 5349 |
| TRIAE_CS42_7AS_TGACv1_569068_AA1806240.1 | -----                                                         | 2646 |
| TRIAE_CS42_4AL_TGACv1_288580_AA0952690.1 | TTCCTTCCGCGTTGTTCAAATGTATAGACAAGATTATGAATGATGAACCTGAGCTGGCT   | 5418 |
| TRIAE_CS42_7DS_TGACv1_622487_AA2040690.1 | TTCCTTCCGCGTTGTTCAAATGTATAGACAAGATTATGAATGATGAACCTGAGCTGGCT   | 5409 |
| TRIAE_CS42_7AS_TGACv1_569068_AA1806240.1 | -----                                                         | 2646 |
| TRIAE_CS42_4AL_TGACv1_288580_AA0952690.1 | TCCCTTCAAAGAGACACATCCACCGAGAGGAATCGGAGGTTCCGGTGACATGCACGACAG  | 5478 |
| TRIAE_CS42_7DS_TGACv1_622487_AA2040690.1 | CCTCTTCAAAGAGACATCCACCGAGAGGACTCGGAGGTTCCGGTTACCTGCAGGACGCG   | 5469 |
| TRIAE_CS42_7AS_TGACv1_569068_AA1806240.1 | -----                                                         | 2646 |
| TRIAE_CS42_4AL_TGACv1_288580_AA0952690.1 | CTTCAGAAGGCATTACGCGAGGACAAGGGTTCGTCTAGTTTTGACAAATCTGGGTCATAG  | 5538 |
| TRIAE_CS42_7DS_TGACv1_622487_AA2040690.1 | GTCAGAAGGCATTAAGCGAGGACAAGGCTAGTTT-----TGACAAATCTGGGTCATAG    | 5523 |

### 3. 7AS\_TGACv1\_569068\_AA1806230.1 (7A 的后半段约 3000-5000bp) 与 4AL 和 7DS 比对

CLUSTAL O (1.2.4) multiple sequence alignment

|                                          |                                                              |     |
|------------------------------------------|--------------------------------------------------------------|-----|
| TRIAE_CS42_7AS_TGACv1_569068_AA1806230.1 | -----                                                        | 0   |
| TRIAE_CS42_4AL_TGACv1_288580_AA0952690.1 | ATGGGGAGGTCACCGTCTGCGGTAGTGAGCCCCCGTCAAGAAGGGCCCGTGGACGGAG   | 60  |
| TRIAE_CS42_7DS_TGACv1_622487_AA2040690.1 | ATGGGGAGGTCGCGTCTGTCAGCAGTGAGCCCCCTTGAAGAAGGGCCCATGGACGGAG   | 60  |
| TRIAE_CS42_7AS_TGACv1_569068_AA1806230.1 | -----                                                        | 0   |
| TRIAE_CS42_4AL_TGACv1_288580_AA0952690.1 | GAGGAGGACAGGCTGCTCGTGGACTACATCAAGTTGCATGGCACCGGCGGCAACTGGCGA | 120 |
| TRIAE_CS42_7DS_TGACv1_622487_AA2040690.1 | GAGGAGGACAGGCTGCTCGTGGACTACATCAAGTTGCATGGCACCGGCGGCAACTGGCGA | 120 |
| TRIAE_CS42_7AS_TGACv1_569068_AA1806230.1 | -----                                                        | 0   |
| TRIAE_CS42_4AL_TGACv1_288580_AA0952690.1 | ACCATCCCCAAGCGCGCTGGCCTCAACCGCTGCGGCAAGAGTGCCGCCTCCGTTGGACC  | 180 |
| TRIAE_CS42_7DS_TGACv1_622487_AA2040690.1 | ACCATCCCCAAGCGCGCGCCCTCAACCGCTGCGGCAAGAGTGCCGCCTCCGTTGGACC   | 180 |
| TRIAE_CS42_7AS_TGACv1_569068_AA1806230.1 | -----                                                        | 0   |
| TRIAE_CS42_4AL_TGACv1_288580_AA0952690.1 | AACTACTCCACCCCGACATCAAGCGCGGACCCCTCACCGAGATGAGGAGAAAACCACC   | 240 |
| TRIAE_CS42_7DS_TGACv1_622487_AA2040690.1 | AACTACTCCACCCCGACATCAAGCGCGGACCCCTCACCGATGAGGAGGAGAAAACCACC  | 240 |
| TRIAE_CS42_7AS_TGACv1_569068_AA1806230.1 | -----                                                        | 0   |
| TRIAE_CS42_4AL_TGACv1_288580_AA0952690.1 | ATCCACTCCACTCCATGCTCGGCAACAAGTGGTCGGCGATTGCAACCCATCTGCCGGA   | 300 |
| TRIAE_CS42_7DS_TGACv1_622487_AA2040690.1 | ATCCACTCCACTCCATGCTCGGCAACAAGTGGTCGGCGATTGCAACCCATCTGCCAGGA  | 300 |
| TRIAE_CS42_7AS_TGACv1_569068_AA1806230.1 | -----                                                        | 0   |
| TRIAE_CS42_4AL_TGACv1_288580_AA0952690.1 | AGGACAGGCAATTTTATCAAGAATTACTGGAACATGAACCTGCGCAAGAAGCTACTCCAC | 360 |
| TRIAE_CS42_7DS_TGACv1_622487_AA2040690.1 | AGGACAGGCAATTTTATCAAGAATTACTGGAACACAAACCTGCGCAAGAAGCTACTCCAC | 360 |
| TRIAE_CS42_7AS_TGACv1_569068_AA1806230.1 | -----                                                        | 0   |
| TRIAE_CS42_4AL_TGACv1_288580_AA0952690.1 | ATGGGCATCGACCCATCAGGCACAGCCGCGCGCGACCTAGCCAGCTTACAGGGCTC     | 420 |
| TRIAE_CS42_7DS_TGACv1_622487_AA2040690.1 | ATGGGCATCGACCCATCAGGCACAACCCGCGCAGCCAGCTAGCCAGCTTACAGGGCTC   | 420 |
| TRIAE_CS42_7AS_TGACv1_569068_AA1806230.1 | -----                                                        | 0   |
| TRIAE_CS42_4AL_TGACv1_288580_AA0952690.1 | CCCAGTCTCCCCGCCACGCGCGCCCGCCAGTAATAGCCTCTCCGGCGTCAGCATGGGC   | 480 |



|                                          |                                                              |     |
|------------------------------------------|--------------------------------------------------------------|-----|
| TRIAE_CS42_7DS_TGACv1_622487_AA2040690.1 | CCCAGTCTCCCCGCCACCGCCGCGCCCCAGTAATAGCCTCTCCAGCGTCAGCATGCCC   | 480 |
| TRIAE_CS42_7AS_TGACv1_569068_AA1806230.1 | -----                                                        | 0   |
| TRIAE_CS42_4AL_TGACv1_288580_AA0952690.1 | CCCAGCGCTGGGACATGAATGCTGCCAGGCCACGCGACGTGGCCAGCTTCGCCGGG     | 540 |
| TRIAE_CS42_7DS_TGACv1_622487_AA2040690.1 | CCCAGCACCTGGGACATGAATGCTGCCAGGCCACGCTGACGTGGCCAGCTTCGCCGGG   | 540 |
| TRIAE_CS42_7AS_TGACv1_569068_AA1806230.1 | -----                                                        | 0   |
| TRIAE_CS42_4AL_TGACv1_288580_AA0952690.1 | GGCGGCTCGGACATGAACACTCTCAGGATCAAGGACGAAGCTACCAGCTTACCGGCAGC  | 600 |
| TRIAE_CS42_7DS_TGACv1_622487_AA2040690.1 | GGC-----GGTCTCAGGATCAAGGACGAAGCTACCAGCTTACCGGCAGT            | 585 |
| TRIAE_CS42_7AS_TGACv1_569068_AA1806230.1 | -----                                                        | 0   |
| TRIAE_CS42_4AL_TGACv1_288580_AA0952690.1 | TACTCAGACATGAAACCTCCAGGATCAAGGATGAAGCCAGCAGCTTACCGGTAGCCAC   | 660 |
| TRIAE_CS42_7DS_TGACv1_622487_AA2040690.1 | TACTCAGACATGAAACCTCCTATGATCAAGGATGAAGCCAGCAGCTTACCGGCAGTCAC  | 645 |
| TRIAE_CS42_7AS_TGACv1_569068_AA1806230.1 | -----                                                        | 0   |
| TRIAE_CS42_4AL_TGACv1_288580_AA0952690.1 | TCGGAAATGAAACCTCCAGAATCAAGTACGAAGCCGCCAGCTTAATCAGTAGCCACTCG  | 720 |
| TRIAE_CS42_7DS_TGACv1_622487_AA2040690.1 | TCGGAACTGAAACCTCCAGGATCAAGTACGAAGCCACTAGTTTACCGGTAGCCACTCG   | 705 |
| TRIAE_CS42_7AS_TGACv1_569068_AA1806230.1 | -----                                                        | 0   |
| TRIAE_CS42_4AL_TGACv1_288580_AA0952690.1 | GACATGAAACCTCCAGGATCAAGGACGAAGCCGCCAGCTTCACTGGAAGACACTCGGAC  | 780 |
| TRIAE_CS42_7DS_TGACv1_622487_AA2040690.1 | GACATGAAACCTCACAGGATCAAGGACGAAGCCGCCAGCTTCACTGGCAGACACTCGGAC | 765 |
| TRIAE_CS42_7AS_TGACv1_569068_AA1806230.1 | -----                                                        | 0   |
| TRIAE_CS42_4AL_TGACv1_288580_AA0952690.1 | ATGAAACCTCTCAGGTC AAGGACGAAGCCGCTGCTTACCGGCAGCTACTCGGACAGG   | 840 |
| TRIAE_CS42_7DS_TGACv1_622487_AA2040690.1 | ATGAAACCTCTCAGGATCAAGGACGAAGCCGCCAGCTTACCGGCAGTTGCTCGGACAGG  | 825 |
| TRIAE_CS42_7AS_TGACv1_569068_AA1806230.1 | -----                                                        | 0   |
| TRIAE_CS42_4AL_TGACv1_288580_AA0952690.1 | AAACCTCCAGGATCCAGGACGAAGGACGCTACTCAGGCGCTGTGCTGGTGGGACATG    | 900 |
| TRIAE_CS42_7DS_TGACv1_622487_AA2040690.1 | AAACCTCCAGGATCCAGAACGAAGGACGCTACTCAGGCGCTGGTGTGTTGGGACATG    | 885 |
| TRIAE_CS42_7AS_TGACv1_569068_AA1806230.1 | -----                                                        | 0   |
| TRIAE_CS42_4AL_TGACv1_288580_AA0952690.1 | AACACTCTCTCCATGCTCCAGCCCAACCCGCAAGTTCCATCTCCTCCAGGGCCATTGT   | 960 |
| TRIAE_CS42_7DS_TGACv1_622487_AA2040690.1 | AACACTCTCTCCATGGCCAGTCCAACGCCCAAGTTCCATCTCCTCCAGGGCCATTGT    | 945 |
| TRIAE_CS42_7AS_TGACv1_569068_AA1806230.1 | -----                                                        | 0   |

|                                          |                                                              |      |
|------------------------------------------|--------------------------------------------------------------|------|
| TRIAE_CS42_4AL_TGACv1_288580_AA0952690.1 | TGGGTGATCAGTGCTTCCTTGGGCGCCATGAGAGCTCTTGTGGGAAGCTGGACGTGCTG  | 1020 |
| TRIAE_CS42_7DS_TGACv1_622487_AA2040690.1 | TGGGTGATCAGTGCTTCCTTGGGCGCCATGAGAGCTCTTGTGGGAAGCTGGACATGCTG  | 1005 |
| TRIAE_CS42_7AS_TGACv1_569068_AA1806230.1 | -----                                                        | 0    |
| TRIAE_CS42_4AL_TGACv1_288580_AA0952690.1 | CTGCTAGATGATTCATCTTCTCAGAAAATCTTCTCCAAGAGGGTGATGGATGGGTGCGC  | 1080 |
| TRIAE_CS42_7DS_TGACv1_622487_AA2040690.1 | CTGCTAGATGATTCATCTTCTCAGAAAATCTTCTCCAAGAGGGTGATGGATGGGTGCGT  | 1065 |
| TRIAE_CS42_7AS_TGACv1_569068_AA1806230.1 | -----                                                        | 0    |
| TRIAE_CS42_4AL_TGACv1_288580_AA0952690.1 | CTCCTCAAAGATGATGTGGAAGAGCTAAGCTCCTACCTTGATGAAGTGCAGAGGTGGAT  | 1140 |
| TRIAE_CS42_7DS_TGACv1_622487_AA2040690.1 | CTCCTCAAAGATGATGTGGAAGAGATAAGCTCCTACCTTGATGAAGTGCAGAGGTGGAT  | 1125 |
| TRIAE_CS42_7AS_TGACv1_569068_AA1806230.1 | -----                                                        | 0    |
| TRIAE_CS42_4AL_TGACv1_288580_AA0952690.1 | GACCATCCCCAATAGCCATGTGCTGGATGAATGAGGCGCGTGATCTGTCTACGACATG   | 1200 |
| TRIAE_CS42_7DS_TGACv1_622487_AA2040690.1 | GACCATCCCCAATAGCCATGTGCTGGATGAATGAGGTGCGTGACCTGTCTTACGACATG  | 1185 |
| TRIAE_CS42_7AS_TGACv1_569068_AA1806230.1 | -----                                                        | 0    |
| TRIAE_CS42_4AL_TGACv1_288580_AA0952690.1 | GAGGATTACATTGACAGCCTTTTATCTGTGCCACCTGACCATTCAACAAAAACAAGAAG  | 1260 |
| TRIAE_CS42_7DS_TGACv1_622487_AA2040690.1 | GAGGATTACATTGACAGCCTTTTATCTGTGCCACCTGACCATTCAACAAAAACAAGAAG  | 1245 |
| TRIAE_CS42_7AS_TGACv1_569068_AA1806230.1 | -----                                                        | 0    |
| TRIAE_CS42_4AL_TGACv1_288580_AA0952690.1 | AAGAAAAACAAGAAGATGATGACCATAAAGAAGAGGCTCAAATGGTACAAACAGATCACA | 1320 |
| TRIAE_CS42_7DS_TGACv1_622487_AA2040690.1 | AAGAAAAACAAGAAGATGATGACCATAAAGAAGAGGCTCAAATGGTACAAACAGATCACA | 1305 |
| TRIAE_CS42_7AS_TGACv1_569068_AA1806230.1 | -----                                                        | 0    |
| TRIAE_CS42_4AL_TGACv1_288580_AA0952690.1 | TACGTCACGCAAGTGTGCAACATGGTGTCAAGACCAGCAAACGCGTTCATGTTAGTGTT  | 1380 |
| TRIAE_CS42_7DS_TGACv1_622487_AA2040690.1 | TACGTCATGCAAGTGTGCAACATGGTGTCAAGACCAGCAAACGCGTTCATGTTAGTGTT  | 1365 |
| TRIAE_CS42_7AS_TGACv1_569068_AA1806230.1 | -----                                                        | 0    |
| TRIAE_CS42_4AL_TGACv1_288580_AA0952690.1 | GTCCCTCGTCTTCCCAAGAAGCCAAGATTGCGGAAACAATTCAGATTCAGGATCTAT    | 1440 |
| TRIAE_CS42_7DS_TGACv1_622487_AA2040690.1 | GTCCCTCGTCTTCCCAAGAAGCCAAGATTGCGGAAACAATTCAGATTCAGGATCTAT    | 1425 |
| TRIAE_CS42_7AS_TGACv1_569068_AA1806230.1 | -----                                                        | 0    |
| TRIAE_CS42_4AL_TGACv1_288580_AA0952690.1 | GTCCAGGAGGCCATTGAACGGTACGATAGATATATGCTCCATTGTTGCAGCAACTTGAGG | 1500 |
| TRIAE_CS42_7DS_TGACv1_622487_AA2040690.1 | GTCCAGGAGGCTATTGAACGGTATGACAGATATAATCTCCATTGTTGCAGCAACTTGAGG | 1485 |

|                                          |                                                                 |      |
|------------------------------------------|-----------------------------------------------------------------|------|
| TRIAE_CS42_7AS_TGACv1_569068_AA1806230.1 | -----                                                           | 0    |
| TRIAE_CS42_4AL_TGACv1_288580_AA0952690.1 | AGACGTACATCTTGTCCACTGGCCATATGCTTCCAATGCACTATGAAGAAACCAATGAT     | 1560 |
| TRIAE_CS42_7DS_TGACv1_622487_AA2040690.1 | AGACGTACATCTTGTCCACTGGCCATATGCTTCCAATGCACTATGAAGAAACCAATGAT     | 1545 |
| TRIAE_CS42_7AS_TGACv1_569068_AA1806230.1 | -----                                                           | 0    |
| TRIAE_CS42_4AL_TGACv1_288580_AA0952690.1 | CATGTTGTAATTGATGGCCGGATGAATGAGTTTATCGACTCACTGGTGGCTGATATTGTG    | 1620 |
| TRIAE_CS42_7DS_TGACv1_622487_AA2040690.1 | CACGTTGTAATTGATGGCCGGATGAATGAGTTTATCGACTCACTGGTGG-----          | 1594 |
| TRIAE_CS42_7AS_TGACv1_569068_AA1806230.1 | -----                                                           | 0    |
| TRIAE_CS42_4AL_TGACv1_288580_AA0952690.1 | GCAGATCAGCAGCAGCTCAAGTGGTATCTGTCCTTGGATCTGGATGTCTGGGTAATACT     | 1680 |
| TRIAE_CS42_7DS_TGACv1_622487_AA2040690.1 | -CAGATCAGCAGCAGCTCAAGTGGTATCTGTCCTTGGATTTGGATGTCTGGGTAATACT     | 1653 |
| TRIAE_CS42_7AS_TGACv1_569068_AA1806230.1 | -----                                                           | 0    |
| TRIAE_CS42_4AL_TGACv1_288580_AA0952690.1 | ACACTTGCCAAAAGTGTGTACAACAGAATTGGGATACAATTGATTGCAGAGCTTTCATT     | 1740 |
| TRIAE_CS42_7DS_TGACv1_622487_AA2040690.1 | ACACTTGCCAAAAGTGTGTACAACAGAATTGGGATGCAATTGATTGCAGAGCTTTCATT     | 1713 |
| TRIAE_CS42_7AS_TGACv1_569068_AA1806230.1 | -----                                                           | 0    |
| TRIAE_CS42_4AL_TGACv1_288580_AA0952690.1 | CGGATGCCAAAAAGCCGGATATGCAGATACTTTCTGCGACTTGTCTCACAACCTCCAC      | 1800 |
| TRIAE_CS42_7DS_TGACv1_622487_AA2040690.1 | CGAGTGTCCAAAAAGCCGGATATGCAGATACTTTCTGCGACTTGTCTCACAACCTCCAC     | 1773 |
| TRIAE_CS42_7AS_TGACv1_569068_AA1806230.1 | -----                                                           | 0    |
| TRIAE_CS42_4AL_TGACv1_288580_AA0952690.1 | CAGAAAAAGCGCCACTACATGCCAATTCTAATGAGCTTGGCATCAGCGACATTAATATC     | 1860 |
| TRIAE_CS42_7DS_TGACv1_622487_AA2040690.1 | CAGAAGAAGCGCCAATACATGCCAATTCTAATGAGCTTGGCATCAGCGACATTAATATC     | 1833 |
| TRIAE_CS42_7AS_TGACv1_569068_AA1806230.1 | -----                                                           | 0    |
| TRIAE_CS42_4AL_TGACv1_288580_AA0952690.1 | AGAAAACATCTGCAAGATAAAAAGGTATCTAATTGTTATTGATGATTTGTTGGGACGCATCA  | 1920 |
| TRIAE_CS42_7DS_TGACv1_622487_AA2040690.1 | AGCAAAACATCTGCAAGATAAAAAGGTACCTAATTATTATTGATGATTTGTTGGGACGCATCA | 1893 |
| TRIAE_CS42_7AS_TGACv1_569068_AA1806230.1 | -----                                                           | 0    |
| TRIAE_CS42_4AL_TGACv1_288580_AA0952690.1 | GCATGGGATATTATCAAGTATGCCTTTCCAAATGGAAACCGTGGCAGCAGAATAATAATA    | 1980 |
| TRIAE_CS42_7DS_TGACv1_622487_AA2040690.1 | GCATGGGATATTATCAAAATATGCTTTTCCAAATGGAAACCGTGGCAGCAGAATAATAATA   | 1953 |
| TRIAE_CS42_7AS_TGACv1_569068_AA1806230.1 | -----                                                           | 0    |
| TRIAE_CS42_4AL_TGACv1_288580_AA0952690.1 | ACTACACAGATTGAAGATGTTGCATTAACATGTTGCTCTGATCACTCAGAACATGTTTTC    | 2040 |
| TRIAE_CS42_7DS_TGACv1_622487_AA2040690.1 | ACTACACAGATTGAAGATGTTGCATTAACATGTTGCTGTGATCACTCAGAACATGTTTTC    | 2013 |

|                                          |                                                               |      |
|------------------------------------------|---------------------------------------------------------------|------|
| TRIAE_CS42_7AS_TGACv1_569068_AA1806230.1 | -----                                                         | 0    |
| TRIAE_CS42_4AL_TGACv1_288580_AA0952690.1 | GAGATGAAACCTCTTGACGAAGATCACTCAAGAAAGCTATTCTTTAACAGGCTTTTGGT   | 2100 |
| TRIAE_CS42_7DS_TGACv1_622487_AA2040690.1 | ATGATGAAACCTCTTGATGACGATCACTCAAGAAAGCTGTTCTTTAACAGACTTTTGGT   | 2073 |
| TRIAE_CS42_7AS_TGACv1_569068_AA1806230.1 | -----                                                         | 0    |
| TRIAE_CS42_4AL_TGACv1_288580_AA0952690.1 | TCTGGAAGTGACTGTCTGAAGAATTTAAACAAGTTTCAAATGAAATGTTGATGATGT     | 2160 |
| TRIAE_CS42_7DS_TGACv1_622487_AA2040690.1 | TCTGGAAGTGACTGCCCTGAAGAATTTAAACAAGTTTCAAATGAAATGTTGATGATGT    | 2133 |
| TRIAE_CS42_7AS_TGACv1_569068_AA1806230.1 | -----                                                         | 0    |
| TRIAE_CS42_4AL_TGACv1_288580_AA0952690.1 | GGTGGTTTCCGCTAGCTACGATCAACATAGCTACTCATTGGCAAATCAACAGAAAGCA    | 2220 |
| TRIAE_CS42_7DS_TGACv1_622487_AA2040690.1 | GGTGGTTTCCGCTAGCTATGATCAACATAGCTAGTCATTGGCAAATCAACAGACAGCA    | 2193 |
| TRIAE_CS42_7AS_TGACv1_569068_AA1806230.1 | -----                                                         | 0    |
| TRIAE_CS42_4AL_TGACv1_288580_AA0952690.1 | GTATCACTGGATTTTCTGACATACATACGTGATTCGTTGAGGTCACAATCGTGGTCAAGT  | 2280 |
| TRIAE_CS42_7DS_TGACv1_622487_AA2040690.1 | GTATCACTGGATTTTCTGACATACATACGTGATTCGTTGAGGTCACAATCGTGGTCAAGT  | 2253 |
| TRIAE_CS42_7AS_TGACv1_569068_AA1806230.1 | -----                                                         | 0    |
| TRIAE_CS42_4AL_TGACv1_288580_AA0952690.1 | TCTGCTTCGGAAAGAACAAGACAAGTACTGAACTCAGCTACAATGATCTTCTCATCAT    | 2340 |
| TRIAE_CS42_7DS_TGACv1_622487_AA2040690.1 | TCTACTTCGGAAAGAACAAGACAAGTACTGAACTCAGCTACAATAATCTTCTCATCAT    | 2313 |
| TRIAE_CS42_7AS_TGACv1_569068_AA1806230.1 | -----                                                         | 0    |
| TRIAE_CS42_4AL_TGACv1_288580_AA0952690.1 | CTGAAGACATGTTTGTGTATCTTCATATGTATCCAGAGGGCTCCATAGCTGGAAGGAT    | 2400 |
| TRIAE_CS42_7DS_TGACv1_622487_AA2040690.1 | CTGAAGACATGTTTGTGTATCTTCATATGTATCCAGAGGGCTCCATAGCTGGAAGGAT    | 2373 |
| TRIAE_CS42_7AS_TGACv1_569068_AA1806230.1 | -----                                                         | 0    |
| TRIAE_CS42_4AL_TGACv1_288580_AA0952690.1 | GATCTGGTGAAGCAATGGGTGGCTGAAGCCTTCATCAATACACGAAAAGGGAAAGAAAA   | 2460 |
| TRIAE_CS42_7DS_TGACv1_622487_AA2040690.1 | GATCTGGTGAAGCAATGGGTGGCTGAAGCCTTCATCAATACACGAAAAGGGAAAGAAAA   | 2433 |
| TRIAE_CS42_7AS_TGACv1_569068_AA1806230.1 | -----                                                         | 0    |
| TRIAE_CS42_4AL_TGACv1_288580_AA0952690.1 | GATCAAACTGGATGGAGAAAGCTGCAGGAATCTATTTGATGAACTTGTGATAGAAGA     | 2520 |
| TRIAE_CS42_7DS_TGACv1_622487_AA2040690.1 | GATCAAACTGGATGGAGAAAGCTGCAGGAATCTATTTGATGAACTTATTGATAGAAGA    | 2493 |
| TRIAE_CS42_7AS_TGACv1_569068_AA1806230.1 | -----                                                         | 0    |
| TRIAE_CS42_4AL_TGACv1_288580_AA0952690.1 | TTCATCCAACCCCTAAATATCAACTACAACAATAAGGTGTTGTCATGTACTGTTTCATGAA | 2580 |
| TRIAE_CS42_7DS_TGACv1_622487_AA2040690.1 | TTCATCCAACCTCTAAATATCAACTACAACAATAAGGTGTTGTCCTGTACTGTTTCATGAA | 2553 |

|                                          |                                                              |      |
|------------------------------------------|--------------------------------------------------------------|------|
| TRIAE_CS42_7AS_TGACv1_569068_AA1806230.1 | -----                                                        | 0    |
| TRIAE_CS42_4AL_TGACv1_288580_AA0952690.1 | GTGGTACGTGATCTTCTTGCACACAAGTCTG-----TGGTAGTAGAT              | 2622 |
| TRIAE_CS42_7DS_TGACv1_622487_AA2040690.1 | GTGGTACGTGATCTTCTTGCACACAAGTCTGCAGAAGAGAATTCATTGTGGTAGTAGAT  | 2613 |
| TRIAE_CS42_7AS_TGACv1_569068_AA1806230.1 | -----                                                        | 0    |
| TRIAE_CS42_4AL_TGACv1_288580_AA0952690.1 | TATAATCGAAAGAATATATCACTTTCTCATAAGGCCCGTCGGCTATCTCTCCTTTTGCC  | 2682 |
| TRIAE_CS42_7DS_TGACv1_622487_AA2040690.1 | TATAATCGAAAGAATATATCACTTTCTCATAAGGCCCGTCGGCTATCTCTCCTTTTGCC  | 2673 |
| TRIAE_CS42_7AS_TGACv1_569068_AA1806230.1 | -----                                                        | 0    |
| TRIAE_CS42_4AL_TGACv1_288580_AA0952690.1 | AATGCAAGTTATGCCAAGACACCTGTAACATCACAAGGCGCAGGTCGGTCACTTAAT    | 2742 |
| TRIAE_CS42_7DS_TGACv1_622487_AA2040690.1 | ACTGCAAGGTATGCCAAGACACCAGTAAACATCACAAGCCGCAAGTTCGGTCACTTAAT  | 2733 |
| TRIAE_CS42_7AS_TGACv1_569068_AA1806230.1 | -----                                                        | 0    |
| TRIAE_CS42_4AL_TGACv1_288580_AA0952690.1 | TTTGTGGATTGTTTCGAGTGCATGCCTTGTATTGGAGAGTTCAAGTTCTCCGTGTTCTG  | 2802 |
| TRIAE_CS42_7DS_TGACv1_622487_AA2040690.1 | TTTGTGGATTGTTTCGAGTGCATGCCTTGTATTGGAGAGTTCAAGTTCTCCGTGTTCTG  | 2793 |
| TRIAE_CS42_7AS_TGACv1_569068_AA1806230.1 | -----                                                        | 0    |
| TRIAE_CS42_4AL_TGACv1_288580_AA0952690.1 | AACCTTCAACTATCCGGTCATTGTGGCGACCATGACCCCATAGACCTCACTGGGATTCA  | 2862 |
| TRIAE_CS42_7DS_TGACv1_622487_AA2040690.1 | AACCTTCAACTATCCGGTCATTGTGGCGACCATGACCCCATAGACCTCACTGGGATTCA  | 2853 |
| TRIAE_CS42_7AS_TGACv1_569068_AA1806230.1 | -----                                                        | 0    |
| TRIAE_CS42_4AL_TGACv1_288580_AA0952690.1 | GAACTGTTTCAGTTGAGATATTTGAAGATTACAAGTGATGTGTGCATAAACTACCAAAC  | 2922 |
| TRIAE_CS42_7DS_TGACv1_622487_AA2040690.1 | GAACTGTTTCAGTTGAGATATTTGAAGATTACAAGTGATGTGTGCATAAACTACCAAAC  | 2913 |
| TRIAE_CS42_7AS_TGACv1_569068_AA1806230.1 | -----                                                        | 0    |
| TRIAE_CS42_4AL_TGACv1_288580_AA0952690.1 | CAAATGCGAAAGCTGCAATGTTGGAAACGCTGGATATTATAGATGCACCAAGAGTCACT  | 2982 |
| TRIAE_CS42_7DS_TGACv1_622487_AA2040690.1 | CAAATGCGAAAGCTGCAATGTTGGAAACGCTGGATATTATAGATGCACCAAGAGTCACT  | 2973 |
| TRIAE_CS42_7AS_TGACv1_569068_AA1806230.1 | -----                                                        | 0    |
| TRIAE_CS42_4AL_TGACv1_288580_AA0952690.1 | GCTATCCCGTGGGATATTATATATCTCCACACTTGTGCACCTGACGCTTCTGTTGAC    | 3042 |
| TRIAE_CS42_7DS_TGACv1_622487_AA2040690.1 | GCTATCCCATGGGATATTATATATCTCCACACTTGTGCACCTAACCTTCTGTTGAC     | 3033 |
| TRIAE_CS42_7AS_TGACv1_569068_AA1806230.1 | -----ATGACTGACTCAGTCATCAGTCTGTGGAGCCTT                       | 33   |
| TRIAE_CS42_4AL_TGACv1_288580_AA0952690.1 | ACAAATCTGCTGGATTGGATTGGCAGCATGACTGGCTCCATCATCAGTCTGTGGAGCCTT | 3102 |

|                                          |                                                               |      |
|------------------------------------------|---------------------------------------------------------------|------|
| TRIAE_CS42_7DS_TGACv1_622487_AA2040690.1 | ACAAATCTGCTGGATTGGATTGGCAGCATGACTGACTCCATCATCAGTCTGTGGAGCCTT  | 3093 |
|                                          | ***** ** *****                                                |      |
| TRIAE_CS42_7AS_TGACv1_569068_AA1806230.1 | GGCAAGCTGAACTACCTGCAGGATCTTACCTTAACATGTGCTGATTCTTC-----       | 86   |
| TRIAE_CS42_4AL_TGACv1_288580_AA0952690.1 | GGCAACCTGAACTACCTGCAGGATCTTATCTTACCATTCTTCTACACATCCTCTGGC     | 3162 |
| TRIAE_CS42_7DS_TGACv1_622487_AA2040690.1 | GGCAACCTGAACTACCTGCAGGATCTTATCTTACCATTCTTCTACACATCCTCTGGC     | 3153 |
|                                          | ***** ***** ***** ***** ** * * * * * * * *                    |      |
| TRIAE_CS42_7AS_TGACv1_569068_AA1806230.1 | -----ACTTCTGGCGTGAAGCTCTGGCTCATTGATCGGAGGCATGGTAACTGAAA       | 141  |
| TRIAE_CS42_4AL_TGACv1_288580_AA0952690.1 | CATCCAGAGAAAAACATGGAAGCTCTGGGTCTTTACTAGGAGGACATGGCAACTGAAA    | 3222 |
| TRIAE_CS42_7DS_TGACv1_622487_AA2040690.1 | CATCCAGAGAAAAACATGGAAGCTCTGGGTCTTTACTAGGAGGACATGGCAACTGAAA    | 3213 |
|                                          | * * ***** * ** * ***** ***** *****                            |      |
| TRIAE_CS42_7AS_TGACv1_569068_AA1806230.1 | ACTATAGTAATGTCTCATGGCTCATCG-----GTGATTCTGGCGCCTCAAAA          | 189  |
| TRIAE_CS42_4AL_TGACv1_288580_AA0952690.1 | ATTATAGTAGTGTCTCATGGCCATTGGTTAAAGATATTGTGGTCTGTGGCTCAAAA      | 3282 |
| TRIAE_CS42_7DS_TGACv1_622487_AA2040690.1 | ATTATAGTAGTGTCTCATGGCCATCGGTTAAAGATATTGTGGTCTGTGGCTCAAAA      | 3273 |
|                                          | * ***** ***** ** * ** ***** *****                             |      |
| TRIAE_CS42_7AS_TGACv1_569068_AA1806230.1 | GCAATAATTCTGGGATGACTTGGAACTCTCCCCCTCTCCAGAGATTGAATGCTCG       | 249  |
| TRIAE_CS42_4AL_TGACv1_288580_AA0952690.1 | GTAATCATTCTGGGATGAGTTGGAACCTCTCCACTTCTCCAGAGATTGAATGCTCG      | 3342 |
| TRIAE_CS42_7DS_TGACv1_622487_AA2040690.1 | GTAATCATTCTGGGATGAGTTGGAACCTCTCCACTTCTCCAGAGATTGAATGCTCA      | 3333 |
|                                          | * ** ***** ***** *****                                        |      |
| TRIAE_CS42_7AS_TGACv1_569068_AA1806230.1 | CCGCACAGCTGCATCATAATTTCCCGAATTCCTAAGTGGATTAAGAACTTAGCCACCTG   | 309  |
| TRIAE_CS42_4AL_TGACv1_288580_AA0952690.1 | CCACACAGCTGCGTCATAATTTCCCGAATTCCTAGTGGATTAAGAACTTAGGTAACCTG   | 3402 |
| TRIAE_CS42_7DS_TGACv1_622487_AA2040690.1 | CCGCACAGCTGCGTCATAATTTCCCGAATTCCTAAGTGGGTTAAGAACTTAGGTAACCTG  | 3393 |
|                                          | ** ***** ** ***** ***** ***** ** * * * * *                    |      |
| TRIAE_CS42_7AS_TGACv1_569068_AA1806230.1 | TGCATTCTGAAGATTGCAGTGGTGGAACTGCAGATTAGTTGGTTGATATTCTGAGAGGA   | 369  |
| TRIAE_CS42_4AL_TGACv1_288580_AA0952690.1 | TGCATTCTGAAGATTGCAGTGGTGGAACTGCAGATTAGTTGGTTGATATTCTGAGAGGA   | 3462 |
| TRIAE_CS42_7DS_TGACv1_622487_AA2040690.1 | TGCATTCTGAAGATTGCAGTGGTGGAACTGCAGATTAGTTGGTTGATATTCTGAGAGGA   | 3453 |
|                                          | ***** ***** ***** ***** ***** ***** *****                     |      |
| TRIAE_CS42_7AS_TGACv1_569068_AA1806230.1 | TTGCCTGCCCTCACTGCTCTGTCTGTATGTGCGGCTGCGCCATTGAAAAGGATCATC     | 429  |
| TRIAE_CS42_4AL_TGACv1_288580_AA0952690.1 | TTGCCTGCCCTCACTGCTCTGTCTGTATGTGCGGCTGCGCCATTGAAAAGGATCCTC     | 3522 |
| TRIAE_CS42_7DS_TGACv1_622487_AA2040690.1 | TTGCCTGCCCTCACTGCTCTGTCTGTATGTGCGGCTGCGCCATTGAAAAGGATCCTC     | 3513 |
|                                          | ***** ***** ***** ***** * ***** * ***** **                    |      |
| TRIAE_CS42_7AS_TGACv1_569068_AA1806230.1 | TTCAACAAGGCAGACGGGTTCTCAGTTCTCAAGTACTTCAAGTTGACTGCACGAGTGGT   | 489  |
| TRIAE_CS42_4AL_TGACv1_288580_AA0952690.1 | TTTGACAAGATGCCCAGGTTTCTCAGTTCTCAAGTACTTCAAGTTGAGGTTGACGAGTGGT | 3582 |
| TRIAE_CS42_7DS_TGACv1_622487_AA2040690.1 | TTTGACAAGATGCCCAGGTTTCTCAGTTCTCAAGTACTTCAAGTTGAGGTTGACGAGTGGT | 3573 |
|                                          | ** ***** * ***** ***** ***** ***** * *****                    |      |
| TRIAE_CS42_7AS_TGACv1_569068_AA1806230.1 | ATAGCGTGTCTAAAATTTGAGGCGCAAGCAATGCCTAATCTTGAAGCTCAAGTAGGT     | 549  |

|                                          |                                                              |      |
|------------------------------------------|--------------------------------------------------------------|------|
| TRIAE_CS42_4AL_TGACv1_288580_AA0952690.1 | ATCCCATGGCTGAAATTTGAGGCGGATGCAATGCCTAACCTCTGGAAGCTGAAGCTAGGT | 3642 |
| TRIAE_CS42_7DS_TGACv1_622487_AA2040690.1 | ATCCCATGGCTGAAATTTGAGGCGGATGCAATGCCTAATCTCTGGAAGCTGAAGCTGGGT | 3633 |
|                                          | ** * ** * ***** * ***** ***** ***** **                       |      |
| TRIAE_CS42_7AS_TGACv1_569068_AA1806230.1 | TTCAATGCCACCCCGAATGGACCAACATCAACTTATCCGCATCGAGCATATGCCAAAC   | 609  |
| TRIAE_CS42_4AL_TGACv1_288580_AA0952690.1 | TTCAATGCAATCCCGAATGGACCAACATCAACTAATCTGCATCGAGCATATCCAGAC    | 3702 |
| TRIAE_CS42_7DS_TGACv1_622487_AA2040690.1 | TTCAATGCAATCCCGAATGGACCAACATCAACTAATCCGCATCGAGCATATGCCAGAC   | 3693 |
|                                          | ***** * ***** ***** ***** **                                 |      |
| TRIAE_CS42_7AS_TGACv1_569068_AA1806230.1 | CTTAAAGGATATCCGTAATAATTTGGGGGTAGTGCTCATATAGAGTATGCGAGGTCT    | 669  |
| TRIAE_CS42_4AL_TGACv1_288580_AA0952690.1 | CTTAAAGAGATCTCTGTAATAATTTGGGGGTAGTGCTCTTATAGAGTATGCCGTAAG    | 3762 |
| TRIAE_CS42_7DS_TGACv1_622487_AA2040690.1 | CTTAAAGAGATCTCTGTAATAATTTGGGGGTAGTGCTCTTATAGAGTATGCCGTAAG    | 3753 |
|                                          | ***** ** * ***** ***** ***** ***** *                         |      |
| TRIAE_CS42_7AS_TGACv1_569068_AA1806230.1 | GTT---GTAAGTAGTCATCCGAGAAATCTACAATCAATGCAATGGTGAATTTTGT      | 726  |
| TRIAE_CS42_4AL_TGACv1_288580_AA0952690.1 | ACTGTCATTAGTAATCATCTGAGAAATCTAGAGTCCATGTGTGTTGGTGACTTCTACT   | 3822 |
| TRIAE_CS42_7DS_TGACv1_622487_AA2040690.1 | ACGGTCATTAGTAATCATCTGAGAAATCTAGAGTCCATGTGTGTTGGTGACTTCTACT   | 3813 |
|                                          | * * ** ***** ***** * ** ** ***** ** * *                      |      |
| TRIAE_CS42_7AS_TGACv1_569068_AA1806230.1 | TCAAATGTGTGGAAGCACAAAACAGAACCTTCTCACCAACTGGGCTGTCAAGTCACGT   | 786  |
| TRIAE_CS42_4AL_TGACv1_288580_AA0952690.1 | TTCTATGGTGCCGAGAGACAAAAGAGAACTCCACCAACTCGGCGATCAAGTCGCGC     | 3882 |
| TRIAE_CS42_7DS_TGACv1_622487_AA2040690.1 | TCCTATGGTGATGAAAGCACAAAAGAGAACTCCACCAACTCGGCGGTCGAGTCGCAC    | 3873 |
|                                          | * ** *** * ** ***** ** * ** ***** ** * ** * *                |      |
| TRIAE_CS42_7AS_TGACv1_569068_AA1806230.1 | GCCGAGCTCAGACCAATGGAGGATCTCCAGTCACTCACCACCCTTCTCCAGC         | 846  |
| TRIAE_CS42_4AL_TGACv1_288580_AA0952690.1 | ATGGCCGCCACAACCCAATGGAGACTCGACCAGCCAGTCACCACCGCTTCGCCAC      | 3942 |
| TRIAE_CS42_7DS_TGACv1_622487_AA2040690.1 | ATGGCCGCCACAACCTCAACGGAGACTCGACCAGCCAGTCACCACCGCTTCGCCAC     | 3933 |
|                                          | ** *** ** * ** ***** ** * ** ***** ***** ** *                |      |
| TRIAE_CS42_7AS_TGACv1_569068_AA1806230.1 | TCCGATGGCATCTTCATGGCAG-----ACATGAACTGGAGGCGCTC               | 888  |
| TRIAE_CS42_4AL_TGACv1_288580_AA0952690.1 | TGCAACAGTGTCTCGACAGAGGTGCTGCTTCCGGGACGAGATGTGGAGAGCTC        | 4002 |
| TRIAE_CS42_7DS_TGACv1_622487_AA2040690.1 | TGCGACAGTGTCTCGACAGAGGTGCTGCTTCCGGGACGAGATGTGGAGAGCTC        | 3993 |
|                                          | * * * * ** * * * * * * * * * * * * * * * * * * * * * * * *   |      |
| TRIAE_CS42_7AS_TGACv1_569068_AA1806230.1 | TGCCGCTATCTGACAACCTCGCCCGCTTCCGCTCGCCGGATGCTTCGCCTTCCTT      | 948  |
| TRIAE_CS42_4AL_TGACv1_288580_AA0952690.1 | TGCCACCTCTCCGACAATCTCGCCACCGCTTTCGCTCTCCAGAAGACTTACCTT---    | 4058 |
| TRIAE_CS42_7DS_TGACv1_622487_AA2040690.1 | TGCCACCTCTCCAACAATCTCGCCACCGCTTTCGCTCTCCAGAAGACTTACCTT---    | 4049 |
|                                          | **** ** * * ***** ***** ** * ** * * * * * * * * * * * *      |      |
| TRIAE_CS42_7AS_TGACv1_569068_AA1806230.1 | GTTGACATGCACATCGTCGTGCCGACGCGCCGACCTGCCTGTGCACCTTCCATGCTC    | 1008 |
| TRIAE_CS42_4AL_TGACv1_288580_AA0952690.1 | -----CCTGTGCACATGCGTGCGTACCGCTCCATGCTC                       | 4092 |
| TRIAE_CS42_7DS_TGACv1_622487_AA2040690.1 | -----CCTGTGCACATGCGTGCGTACCGCTCCATGCTC                       | 4083 |
|                                          | * ***** ** * * * * * * * * * * * *                           |      |

|                                          |                                                              |      |
|------------------------------------------|--------------------------------------------------------------|------|
| TRIAE_CS42_7AS_TGACv1_569068_AA1806230.1 | TGCGCACGAAGTCCCTTCTGCATGATTCTTCATGCGCCGTGCCGCTGCCGTGAAGGGC   | 1068 |
| TRIAE_CS42_4AL_TGACv1_288580_AA0952690.1 | TCCGTCCAGAGTCCCTTCTGGATGCCGCTTCGCGCGTCGTGCCGCTGAAGGGGAGGAC   | 4152 |
| TRIAE_CS42_7DS_TGACv1_622487_AA2040690.1 | TCCGTCCGAGTCCCTTCTGGATGCCATCTCGCGCGTCGTGCCGCTGAAGGGGAGGGC    | 4143 |
|                                          | *** * ***** ** **** ** ***** * * ** *                        |      |
| TRIAE_CS42_7AS_TGACv1_569068_AA1806230.1 | AACCGGTGGACCTCCGGAGCTTCTGGGTGAGAAGATGGAGGTCGGGTACGAGTCATTG   | 1128 |
| TRIAE_CS42_4AL_TGACv1_288580_AA0952690.1 | GACCGGTGGACCTCCGGAGCTTCTGGGTGAGGAGTGGAGGTCGGGTATGAGGCACTG    | 4212 |
| TRIAE_CS42_7DS_TGACv1_622487_AA2040690.1 | AACCGGTGGACCTCCGGAGCTTCTGGGTGAGGAGTGGAGGTCGGGTATGAGGCACTG    | 4203 |
|                                          | *** ***** ***** ** ***** ** * **                             |      |
| TRIAE_CS42_7AS_TGACv1_569068_AA1806230.1 | CAGTGGTGTCTGAGTACCTGTACACCGGCTGCGTCGGCGACCTCCCAAGTCGGGTGTC   | 1188 |
| TRIAE_CS42_4AL_TGACv1_288580_AA0952690.1 | CAGTGGTGTCTGAGTACCTGTACACCGGCGCATCCGCGACCTCCCAAGTCAGCATGC    | 4272 |
| TRIAE_CS42_7DS_TGACv1_622487_AA2040690.1 | CAGTGGTGTCTGAGTACCTGTACACCGGCTGCATCCGCGACCTCCCAAGTCGGCATGC   | 4263 |
|                                          | *** ***** ***** ** * ***** ** * **                           |      |
| TRIAE_CS42_7AS_TGACv1_569068_AA1806230.1 | GTCTGCGTGTAGATGGCTGCACGCATGTCGGCTGCCACCCGTCATCTCCTTCATG      | 1248 |
| TRIAE_CS42_4AL_TGACv1_288580_AA0952690.1 | GTTTGGCGCAGCTGGACGGCTGCGCCACGTCGGTTGCCCTCCCGCATCTCCTTCATG    | 4332 |
| TRIAE_CS42_7DS_TGACv1_622487_AA2040690.1 | GTTTGGCGCAGCTGGACGGCTGCGCCATGTCGGCTGCCCTCCCGCATCTCCTTCATG    | 4323 |
|                                          | ** ***** ** * ** ***** * ** ***** ** * ***** *****           |      |
| TRIAE_CS42_7AS_TGACv1_569068_AA1806230.1 | GTGCAGGTCTCTTGGCCGATCCACCTTCCAGATTGCCAAGCTCACCAACCTTCCAG     | 1308 |
| TRIAE_CS42_4AL_TGACv1_288580_AA0952690.1 | GCGCAGGTCTCTTGGCCGATCCATCTTCAGGTTGCGGTGCTCACCAACCTTCCAG      | 4392 |
| TRIAE_CS42_7DS_TGACv1_622487_AA2040690.1 | GCGCAGGTCTCTTGGCCGATCCATCTTCAGGTTGCCGTGCTCACCAACCTTCCAG      | 4383 |
|                                          | * ***** ***** ***** ** * **** ***** *****                    |      |
| TRIAE_CS42_7AS_TGACv1_569068_AA1806230.1 | TGGCGTCTCTTGTATGTCCTTGTATGTTGAAGTTGATAACCTTCCATTGATCTTATCT   | 1368 |
| TRIAE_CS42_4AL_TGACv1_288580_AA0952690.1 | CGGCTTCTCTTGTATGTCCTTGTATGTTGAAGTTGATAACCTTCCATTGATCTTATCT   | 4452 |
| TRIAE_CS42_7DS_TGACv1_622487_AA2040690.1 | CGGCTTCTCTTGTATGTCCTTGTATGTTGAAGTTGATAACCTTCCATTGATCTTATCT   | 4443 |
|                                          | *** ***** ***** ***** ***** ***** *****                      |      |
| TRIAE_CS42_7AS_TGACv1_569068_AA1806230.1 | GTTGCAAACTTATGCAATAAATCATGCATGAACTTCTCGAGAGATGCCTTGAGATGGTA  | 1428 |
| TRIAE_CS42_4AL_TGACv1_288580_AA0952690.1 | GTTGCAAACTTATGCAATAAATCTTGCATGCATCTGCTTGAGAGATGCCTTGAGATGGTA | 4512 |
| TRIAE_CS42_7DS_TGACv1_622487_AA2040690.1 | GTTGCAAACTTATGCAATAAATCTTGCATGCATCTGCTTGAGAGATGCCTTGAGATGGTA | 4503 |
|                                          | ***** ***** ***** ***** * * * ***** *****                    |      |
| TRIAE_CS42_7AS_TGACv1_569068_AA1806230.1 | GTTCCGTCAAATCTTGACATGATTACTCTTGAGAAAGCATTGCCTCCAGATATTATCAAG | 1488 |
| TRIAE_CS42_4AL_TGACv1_288580_AA0952690.1 | GTCCGTCAAATCTTGACATGATTACTCTTGAGAAAGCATTGCCTCCAGATATTATCAAG  | 4572 |
| TRIAE_CS42_7DS_TGACv1_622487_AA2040690.1 | GTCCGTCAAATCTTGACATGATTACTCTTGAGAAAGCATTGCCTCCAGATATTATCAAG  | 4563 |
|                                          | ** ***** ***** ***** ***** * ** *                            |      |
| TRIAE_CS42_7AS_TGACv1_569068_AA1806230.1 | CAAATTGCTGATTCACGCTAAGTCTTGGGTAGTTTCAGCGAAGACAAGGATTTCCT     | 1548 |
| TRIAE_CS42_4AL_TGACv1_288580_AA0952690.1 | CAAATTACTGACTCGCGATAAGTCTTGGGTAATTCACCAAGGACAACGGATTTCCT     | 4632 |
| TRIAE_CS42_7DS_TGACv1_622487_AA2040690.1 | CAGATTACTGATTCACGCTAAGTCTTGGGTAATTCACCGAAGATAAGGATTTCCT      | 4623 |
|                                          | ** ** * ** * ** * ***** ** ***** ** * ** * *****             |      |



|                                          |                                                              |      |
|------------------------------------------|--------------------------------------------------------------|------|
| TRIAE_CS42_7AS_TGACv1_569068_AA1806230.1 | AACAAACATGTAAGAAGGATACTCCAAGCTCTTGACAGTAATGATGCGGAGGTAGCGACG | 1608 |
| TRIAE_CS42_4AL_TGACv1_288580_AA0952690.1 | AACAAACATGTAAGAAGGATATTCGGAGCTCGATTCTTATGATGTGGAGCTAGTGAGG   | 4692 |
| TRIAE_CS42_7DS_TGACv1_622487_AA2040690.1 | AACAAACATGTAAGAAGGATACTCAGAGCTCTTGATTCTGATGATGTGTGTTAGTGAGG  | 4683 |
|                                          | ***** ** * ***** * ** ** *                                   |      |
| TRIAE_CS42_7AS_TGACv1_569068_AA1806230.1 | ATCTGCACCAGGAAGGCAGACTAATCTTGATGATGCGTTTGCCTTGCACTATGCTGTT   | 1668 |
| TRIAE_CS42_4AL_TGACv1_288580_AA0952690.1 | TGCTACTCTACGAAGGCAGACTAATCTTGATGATGCATTTGCATTGCACTATGCTGTA   | 4752 |
| TRIAE_CS42_7DS_TGACv1_622487_AA2040690.1 | ATGCTGCTCAAAGAAGGCGGACTAATCTTGATGGTGCATTTGCATTGCACATGCTGTA   | 4743 |
|                                          | * * * * * ***** ***** ** * ***** ***** *****                 |      |
| TRIAE_CS42_7AS_TGACv1_569068_AA1806230.1 | GAACATTGTGACTCAAAGATCATAACAGAAATTTGGACATCACACTTGCACTGTTAAT   | 1728 |
| TRIAE_CS42_4AL_TGACv1_288580_AA0952690.1 | GAACATTGTGACCAAAGATCACAACAGAACTTCTGGACCTCGAACTTGCACTGTTAAT   | 4812 |
| TRIAE_CS42_7DS_TGACv1_622487_AA2040690.1 | GAACATTGTGACTCGAAGTCACAATGGAATCTTGATATCGACTTGCACTGTTAAT      | 4803 |
|                                          | ***** * ** ** * ** * ** * ** * *****                         |      |
| TRIAE_CS42_7AS_TGACv1_569068_AA1806230.1 | CATAGAAATCCTAGAGTTATACTGTTCTTACATTGCTGCCAGGGAAGAGATCCAAA     | 1788 |
| TRIAE_CS42_4AL_TGACv1_288580_AA0952690.1 | CGTAGAAATCAAAGAGTTATACTGTTCTTACATTGCTGCCAGGGAAGAAATCCTAAA    | 4872 |
| TRIAE_CS42_7DS_TGACv1_622487_AA2040690.1 | CATAGAAATCAAAGAGTTATACTGTTCTTACCGTTGCTGCCAGGGAAGAGATCCTAAA   | 4863 |
|                                          | * ***** ***** ***** ***** ** *                               |      |
| TRIAE_CS42_7AS_TGACv1_569068_AA1806230.1 | ATCTTGCTCTCTTTAACCAGGGTCTCGCCTCCGATCTTACATTGATGGAAGA         | 1848 |
| TRIAE_CS42_4AL_TGACv1_288580_AA0952690.1 | ATCTTGCTCTCTTTAACCAGGAGCTCGCCTCCGATCTTACATTGATGGAAGA         | 4932 |
| TRIAE_CS42_7DS_TGACv1_622487_AA2040690.1 | ATCTTGCTCTCTTTAACCAGGGTCTCGCATTCTGATCTTACATTGATGGAAGA        | 4923 |
|                                          | ***** ** * ***** ** * ***** *****                            |      |
| TRIAE_CS42_7AS_TGACv1_569068_AA1806230.1 | ACAGCAGTCAAATCTCAAAAAGACTCACAAAACATAGGGATTACTTTGGGGTACTGAA   | 1908 |
| TRIAE_CS42_4AL_TGACv1_288580_AA0952690.1 | AAAGCAATCAAATCTCAAAAGACTCACAAAACATGGGATTACTTTGGGATTACTGAA    | 4992 |
| TRIAE_CS42_7DS_TGACv1_622487_AA2040690.1 | AAAGCAGTCAAATCTCAAAAGACTCACAAAACATGGGATTACTTTGGGATTACAGAA    | 4983 |
|                                          | * * * * * ***** ***** ***** ** *                             |      |
| TRIAE_CS42_7AS_TGACv1_569068_AA1806230.1 | AAAGGAAATCGTCTCCTCAAGTCGGTTATGCATTGAGATACTAGAGCAAGCTGAAAGA   | 1968 |
| TRIAE_CS42_4AL_TGACv1_288580_AA0952690.1 | GAAGGAAAACCGTCTCCTGAATATAGTTTATGCATTGAGATACTGGAGCAAGCTGAAAGA | 5052 |
| TRIAE_CS42_7DS_TGACv1_622487_AA2040690.1 | GAAGGAAAACCGTCTCGTGAAGTAGGTTATGCATTAAGATACTGGAGCAAGCTGAAAGA  | 5043 |
|                                          | **** ** * ***** * * * * ***** ***** *****                    |      |
| TRIAE_CS42_7AS_TGACv1_569068_AA1806230.1 | AAAGCACAACCTGGAGAAGATGA-----                                 | 1992 |
| TRIAE_CS42_4AL_TGACv1_288580_AA0952690.1 | AGGGGTCCACAACCTGGAGAAGCATCGGTTTCTCTTGCAATAGCTGGTACTGTCAACGT  | 5112 |
| TRIAE_CS42_7DS_TGACv1_622487_AA2040690.1 | AGGGATCCACAACCTGGAGAAGCATCGGTTTCTCTTGCAATAGCTGGTACTGTCAACGT  | 5103 |
|                                          | * * * * * * * * * *                                          |      |
| TRIAE_CS42_7AS_TGACv1_569068_AA1806230.1 | -----                                                        | 1992 |
| TRIAE_CS42_4AL_TGACv1_288580_AA0952690.1 | GGGACGCTGTGACCTCGAAAATCGAGTTACTTTGATGAGGATAATGTTCCAACCTGAG   | 5172 |
| TRIAE_CS42_7DS_TGACv1_622487_AA2040690.1 | GGAAAGCTGTGTACCTCGAAAATCGAGTTGCTTTGATGAGGATAATGTTCCAACCTGAG  | 5163 |

|                                          |                                                               |      |
|------------------------------------------|---------------------------------------------------------------|------|
| TRIAE_CS42_7AS_TGACv1_569068_AA1806230.1 | -----                                                         | 1992 |
| TRIAE_CS42_4AL_TGACv1_288580_AA0952690.1 | GCAAGAGTAGCAATGGACATCGCTCAAGTGGATTGCACTTTGGAGTTAACCCCTTGATTCT | 5232 |
| TRIAE_CS42_7DS_TGACv1_622487_AA2040690.1 | GCAAGAATAGCAATGGACATCGCTCAAGTGGATTGTACTTTGAAGTTAACCCCTTGATTCT | 5223 |
| TRIAE_CS42_7AS_TGACv1_569068_AA1806230.1 | -----                                                         | 1992 |
| TRIAE_CS42_4AL_TGACv1_288580_AA0952690.1 | GAGGCAAAACCTCCTTCGGAGAAAGAAGTGGCAACCATTGATCTAAATGAAACTCGTTTC  | 5292 |
| TRIAE_CS42_7DS_TGACv1_622487_AA2040690.1 | GGGGCAAAACCTCCTCCGGAGAAAGAAGTGGCAACCATTGATCTAAATGAAACTCCTTTC  | 5283 |
| TRIAE_CS42_7AS_TGACv1_569068_AA1806230.1 | -----                                                         | 1992 |
| TRIAE_CS42_4AL_TGACv1_288580_AA0952690.1 | CAAATGAATGACGAACACTTAGCTCGGATGAGTGCCTTCTCAAAACAGTTGAACTCTGT   | 5352 |
| TRIAE_CS42_7DS_TGACv1_622487_AA2040690.1 | CATATGAATGAAGAACACTTAGCTCGGATGAGTACCCTCTCAAAACAGTTGAACTCTGT   | 5343 |
| TRIAE_CS42_7AS_TGACv1_569068_AA1806230.1 | -----                                                         | 1992 |
| TRIAE_CS42_4AL_TGACv1_288580_AA0952690.1 | AAACGCTTCTTTCCGCGTTGTTCAAATGTCATAGACAAGATTATGAATGATGAACCTGAG  | 5412 |
| TRIAE_CS42_7DS_TGACv1_622487_AA2040690.1 | AAACGCTTCTTTCCGCGTTGTTCAAATGTGATAGACAAGATTATGGATGATGAACCTGAG  | 5403 |
| TRIAE_CS42_7AS_TGACv1_569068_AA1806230.1 | -----                                                         | 1992 |
| TRIAE_CS42_4AL_TGACv1_288580_AA0952690.1 | CTGGCTCCCTTCAAAGAGACACATCCACCGAGAGGAATCGGAGGTTCCGGTACATGCAC   | 5472 |
| TRIAE_CS42_7DS_TGACv1_622487_AA2040690.1 | CTGGCTCCCTTCAAAGAGACGCATCCACCGAGAGGACTCGGAGGTTCCGGTTACCTGCAG  | 5463 |
| TRIAE_CS42_7AS_TGACv1_569068_AA1806230.1 | -----                                                         | 1992 |
| TRIAE_CS42_4AL_TGACv1_288580_AA0952690.1 | GACACGCTTCAGAAGCATTACGCGAGGACAAGGGTTCGTCTAGTTTTGACAAATCTGGG   | 5532 |
| TRIAE_CS42_7DS_TGACv1_622487_AA2040690.1 | GACGCGGTTCAGAAGGCATTAAGCGAGGACAAGGCTAGTTT-----TGACAAATCTGGG   | 5517 |
| TRIAE_CS42_7AS_TGACv1_569068_AA1806230.1 | -----                                                         | 1992 |
| TRIAE_CS42_4AL_TGACv1_288580_AA0952690.1 | TCATAG                                                        | 5538 |
| TRIAE_CS42_7DS_TGACv1_622487_AA2040690.1 | TCATAG                                                        | 5523 |
